# Supplementary material for: Subcortico-Cortical Dysconnectivity in ADHD: A Voxel-Wise Mega-Analysis Across Multiple Cohorts
Source: Atypon-hosted journal article supplement (doi:10.1176/appi.ajp.20230026), 2024-03-13
Supplement: appi.ajp.20230026.ds001.pdf [file appi.ajp.20230026.ds001.pdf]

 


Psychiatry Online
