# Supplementary material for: Subcortico-Cortical Dysconnectivity in ADHD: A Voxel-Wise Mega-Analysis Across Multiple Cohorts
Source: Atypon-hosted journal article supplement (doi:10.1176/appi.ajp.20230026), 2024-03-13
Supplement: appi.ajp.20230026.ds001.pdf [file appi.ajp.20230026.ds001.pdf]

## **SUPPLEMENTARY METHODS**

### **Study protocols for included datasets**

#### *Adolescent Brain Cognitive Development (ABCD)*

The Adolescent Brain Cognitive Development (ABCD) study is an ongoing multisite, longitudinal neuroimaging study of N~11,875 youths(1, 2). See a special issue of *Developmental Cognitive Neuroscience* (Volume 32, Pages 1-164, August 2018). Children were aged between 9 and 11 years old at baseline, and largely recruited via probability sampling of public and private elementary schools within the catchment areas of 21 research sites in the United States of America. Demographic data were monitored to ensure that the study met targets for sex, socioeconomic, ethnic, and racial diversity. Exclusion criteria for children included not being fluent in English or having a parent not fluent in English or Spanish, major medical or neurological conditions, gestational age <28 weeks or birthweight <1200 g, contraindications to MRI scanning, a history of traumatic brain injury, a current diagnosis of schizophrenia, moderate/severe autism spectrum disorder, intellectual disability, or alcohol/substance use disorder.

Clinical and demographic data were taken from the ABCD-BIDS (NDA Collection 3165) participants.tsv file and ABCD release 3.0. For subjects without usable data at baseline we used raw imaging data from the two-year follow-up. We first processed data from the ABCD-BIDS project (NDA Collection 3165)(3). We downloaded additional scans from the NDA Collection

#2573 using the ABCD-BIDS protocol(3). The raw data are available at [https://nda.nih.gov/edit\\_collection.html?id=2573](https://nda.nih.gov/edit_collection.html?id=2573). We excluded scans recommended for exclusion according to the ABCD quality control protocol (exclusion criteria: `imgincl_rsfmri_include=0`)(1, 2).

ADHD diagnoses were made according to a validated computerized parent-answered Kiddie Schedule of Affective Disorders and Schizophrenia for DSM-5 (KSADS-COMP) (4). This included current-ADHD (`ksads_14_853_p = 1`), ADHD-NOS (`ksads_14_856_p = 1`) and ADHD in partial remission (`ksads_14_855_p = 1`). A large number of subjects met criteria for past-ADHD only (`ksads_14_854_p=1`) at baseline ( $N \sim 1,100$ ). Given the young age of the sample, this number is likely inaccurate and we did not include these subjects in the categorical analyses as ADHD cases, unless they were currently taking a psychostimulant medication, in line with previous work using the ABCD cohort (5). Lacking a full-scale IQ measure in ABCD, we assessed estimated general intelligence using WISC-V Matrix Reasoning total scale score [5]. Race and ethnicity were based on parent reported variables `dem_003` and `dem_004`. Race, ethnicity, and sex for the child were reported by the parents (`pdem02`). Household income was assessed via parent report (`demo_comb_income_v2`).

All procedures were approved by a central Institutional Review Board (IRB) at the University of California, San Diego, and by individual site IRBs. Parents/guardians provided written informed consent and children assented before participation in the study. We have access to the genetic and phenotypic data from the NIMH data archive (NDA) Adolescent Brain Cognitive Development (ABCD) / Connectome Coordination Facility (CCF) permission group under a data use certification agreement.

### *Healthy Brain Network (HBN)*

The HBN sample is enriched for emotional and behavioral problems, with ADHD diagnoses present in more than half of the subjects released to date (release 10). Exclusion criteria included serious neurological disorders, neurodegenerative disorders, acute encephalopathy, hearing or visual impairment, lifetime substance abuse necessitating chemical replacement therapy/acute intoxication at time of study, recent diagnosis of a severe mental disorder or manic/psychotic episode within the last 6 months without ongoing treatment, in addition to the onset of suicidality/homicidality where there is no current, ongoing treatment. All participants > 18 years provided signed informed consent, while parents/legal guardians signed informed consent for participants < 18, in addition to minors giving a written assent. The Chesapeake Institutional Review Board approved the study (<https://www.chesapeakeirb.com/>). Brain imaging data for the Healthy Brain Network (HBN) study are publicly available. We accessed additional phenotypic data via a signed data use agreement with the Child Mind Institute.

ADHD diagnoses were determined via the Diagnosis\_ClinicianConsensus spreadsheet, which considered the outcomes of parent, child and (where collected) teacher KSADS-COMP. For some early subjects in the study, a non-computerized version of the KSADS was completed. A team of licensed clinicians also formed “consensus diagnoses” based on other study assessments, notes, the automated K-SADS diagnoses and their own clinical judgement. Medication status was based on the DailyMeds spreadsheet. The sex, race and ethnicity of the child were based on interview with parents (PreInt\_Demos\_Fam).

*Human Connectome Project – Developmental (HCP-D)*

The HCP-D is an accelerated longitudinal study of healthy brain development (age range 5-21 years old at baseline) (6, 7). We included data from HCP-Development Lifespan 2.0. This is a multi-site study with sites in four locations (Boston, Los Angeles, Minneapolis, St. Louis). Diagnostic data were unavailable at the time of data analysis, but the cohort was described as largely healthy at baseline. While medication data were unavailable, we modeled subjects in this dataset as unmedicated given the healthy nature of the sample and the fact that prolonged use of medications for psychiatric disorders was an exclusion criterion. Further exclusion criteria included the subject or subject's parent having insufficient English abilities to complete screening and consent procedures, premature birth (more than 3 weeks early), low birth weight (<5 lb), lifetime history of serious medical conditions, a history of head injuries, hospitalization for two or more days, receiving special services at school and MRI contraindications. We used data from release 2.0 (<https://www.humanconnectome.org/study/hcp-lifespan-development/data-releases>). Sex of the subjects at birth, race and ethnicity were taken from ndar\_subject01. We have access to the phenotypic data from the NIMH data archive (NDA) Adolescent Brain Cognitive Development (ABCD) / Connectome Coordination Facility (CCF) permission group under a data use certification agreement. Subjects provided written informed consent and assent, although parents of participants under 18 years provided written informed consent for their child's participation. All procedures were approved by a central Institutional Review Board administered at Washington University in St. Louis (IRB #201603135).

*Neurobehavioral Clinical Research (NCR)*

The NCR study was enriched for ADHD symptoms by targeting the recruitment of children and adolescents with ADHD traits in addition to children and adolescents with existing ADHD diagnoses and unaffected controls(8). ADHD diagnoses were based on the Parent Diagnostic Interview for Children and Adolescents (DICA-IV), conducted by two experienced clinicians (interrater reliabilities of  $\kappa > 0.9$ ), and made according to DSM-IV-TR criteria(9). A symptom was defined as present if it had an adverse impact on functioning at school, home and/or with peers (with a range from 0 to a maximum of 9 symptoms in each category).

Attention-deficit/hyperactivity disorder combined type was diagnosed when the subject had both six or more symptoms of inattention and six or more symptoms of hyperactivity/impulsivity. The inattentive or hyperactive/impulsive subtypes were diagnosed when symptom counts  $\geq 6$  were confined to one of these domains. ADHD-NOS was considered when subjects had 5 impairing symptoms in either domain, but less than six symptoms in both domains. Diagnoses of past-ADHD/ADHD in partial remission were assigned for subjects who met criteria for ADHD or ADHD-NOS at an earlier timepoint of the study but not at the time of their included scan. The unaffected subjects did not meet criteria for ADHD at the time of their scan or at any previous assessment. Parents were asked the sex, race and ethnicity of their child. Exclusion criteria for all subjects included  $IQ < 70$ , evidence of medical or neurological disorders affecting cerebral anatomy, psychosis or bipolar disorder. The study was approved by the IRB of the NIH. Parents or guardians of children gave written consent and children gave assent.

*National Consortium on Alcohol and Neurodevelopment in Adolescence (NCANDA)*

The NCANDA cohort is from an accelerated longitudinal study of roughly 830 youths and young adults, aged 12 to 21 years old(10–15). There are five data collection sites: Duke University, University of Pittsburgh Medical Center, Oregon Health & Science University, University of California, San Diego, and SRI International. Each site aimed to recruit a community sample that was reflective of local racial/ethnic distributions of the surrounding area with equal sex proportions in each age group. Exclusion criteria for children included not being fluent in English or having a parent not fluent in English or Spanish, major medical or neurological conditions, IQ<70, gestational age <30 weeks or low birth weight, contraindications to MRI scanning, a history of traumatic brain injury, prenatal alcohol/drug exposure, a current or persistent major Axis I psychiatric disorder that would interfere with valid completion of the protocol including psychosis, substance dependence, parental history of psychotic disorder, intellectual disability, or use of psychotropic medications. Subject sex, race and ethnicity were assessed at baseline via a demographics interview(10).

Given the small number of subjects with ADHD in this dataset, we did not include it in the categorical analyses. All subjects were free from psychostimulant medication. The institutional review board at each site approved the study. Adult participants consented to participating, and minors provided written assent along with consent from a parent/legal guardian. We used data from NCANDA\_PUBLIC\_4Y\_REDCAP\_V01 (<https://dx.doi.org/10.7303/syn22216455>), NCANDA\_PUBLIC\_BASE\_RESTINGSTATE\_V01 (<https://dx.doi.org/10.7303/syn11605291>) and NCANDA\_PUBLIC\_BASE\_STRUCTURAL\_V01 (<https://dx.doi.org/10.7303/syn11541569>). We accessed the de-identified NCANDA dataset via

adata use agreement in place with the National Institute on Alcohol Abuse and Alcoholism (NIAAA) (<http://www.ncanda.org/datasharing.php>).

#### *NKI-Rockland cohort*

The NKI-Rockland cohort is comprised of N=1500 child, adolescent and adult subjects from Rockland County, population of 311,687 per the 2010 census, located 15 miles northwest of New York City. The racial and socioeconomic demographics of Rockland County approximately resemble those of the United States census(16). Recruitment was made via a number of sources, including flyers posted at schools, shops, community centers and community events (e.g., street fairs) within Rockland County, as well as via appeals for word-of-mouth recommendations. A team of clinicians discussed data from all study assessments, including clinician administered K-SADS interviews, and formed “consensus diagnoses” based on these assessments, that incorporated impressions of impairment due to symptoms, and their own clinical judgements (16, 17). Full-scale IQ was assessed via the Wechsler intelligence scale (int\_14) (18). Socioeconomic status was defined according to household income (demos\_02). Race and ethnicity were based on parent reported variables dem\_003 and dem\_004. Sex was based on dem\_002 (What is your sex? (Male = 1, Female = 2, ‘Don't Know’ = Missing Data)).

Institutional Review Board Approval was obtained for this project at the Nathan Kline Institute. Written informed consent was obtained from legal guardians and written assent was obtained from the participants.

## **MRI Acquisition**

### *ABCD*

Full details regarding imaging acquisition are available elsewhere and the details are discussed in brief here(1, 2). Four separate resting-state scans were acquired per subject (TR = 800 ms, TE=30ms, flip angle=52°, multiband acceleration factor=6, FOV=216 × 216, slices=60, acquisition voxel size 2.4 x 2.4 x 2.4mm, ~380 volumes [~5 minutes]). During the scan, subjects were instructed to relax and focus on the fixation cross. A 3D T1w inversion prepared RF-spoiled gradient echo scan was also acquired (TR= 2500 ms, TE= range 2-2.9ms (depending on site), flip angle= 8°, FOV= 256 × 256 mm, voxel size at acquisition= 1 × 1 × 1 mm, slices=range 176-225, depending on site). Where possible, anatomical images were acquired using prospective motion correction (1, 2). Resting-state data were acquired with eyes open and passive viewing of a cross hair.

### *Healthy Brain Network*

For more information about the MRI parameters, see

[http://fcon\\_1000.projects.nitrc.org/indi/cmi\\_healthy\\_brain\\_network/MRI%20Protocol.html](http://fcon_1000.projects.nitrc.org/indi/cmi_healthy_brain_network/MRI%20Protocol.html). Two runs of resting-state fMRI data were collected using a T2\*-weighted BOLD echo-planar imaging sequence (TR=800ms, TE=30ms, multiband acceleration factor = 6, number of slices =60, voxel size= 2.4×2.4×2.4 mm, 375 volumes [5 minutes]). For all included sites, anatomic T1 images were acquired using 3-D Magnetization-Prepared Rapid Gradient-Echo Imaging (MPRAGE) sequences (TR= 2.5 s, TE= 3.15 ms, flip angle= 8°, FOV= 256 mm, slice thickness= 0.8 mm, slices=224). In addition, CBIC acquired an MPRAGE structural scan based on the ABCD and HCP-D study protocols including prospective motion correction (TR = 2.5 s, TE = 2.88 ms, flip



angle= 8°, FOV= 256 mm, slice thickness= 173 mm, slices= 176). Where possible, we used the structural scans with prospective motion correction as has been recommended by HBN authors for studies of ‘hyperkinetic’ populations(19). Specific instructions for the resting-state scan were as follows: “Please lie quietly with your eyes open, and direct your gaze towards the plus symbol. During this scan let your mind wander. If you notice yourself focusing on a particular stream of thoughts, let your mind wander away.”

### *Human Connectome Project – Development*

Full details and rationales are provided elsewhere(6, 7). Data were collected on a Siemens 3T Prisma MRI using a 64-channel head coil. Four resting-state runs were collected per subject. These functional scans were acquired with a gradient-recalled echo-planar imaging sequence (TR=800ms, TE=37ms, multiband factor=8, flip angle = 52°, 2.0 mm isotropic voxels, 488 volumes [~6 minutes 30 seconds]). A high-resolution, MPRAGE T1w image was also acquired using prospective motion correction (TR=2,400ms, TE=2.18ms, flip angle= 8°, FOV = 256 × 240 × 167 mm, 0.8 mm isotropic voxels, 208 slices). During the resting-state scan, participants were asked to lie with eyes open, and look at white fixation cross presented on a dark background. They were further asked to “think of nothing in particular”, and not to fall asleep.

### *NCANDA*

Imaging data was collected via 3T General Electric (GE) Discovery MR750 at 3 sites (University of California San Diego, SRI International, and Duke University) and via 3T Siemens TIM TRIO scanners at 2 sites (University of Pittsburgh and Oregon Health & Sciences

University). The parameters for the resting state scans were as follows: TR=2,200ms, TE=30ms, flip angle = 79°, voxel size=3.75mm, 3.75mm, 5mm, slices= 32, 275 volumes [~10 minutes]. Regarding structural images, the GE sites used an Array Spatial Sensitivity Encoding Technique (ASSET) for parallel and accelerated imaging with an 8-channel head coil and acquired an Inversion Recovery-Spoiled Gradient Recalled (IR-SPGR) echo sequence (TR = 5.904 ms, TI = 400 ms, TE = 1.932 ms, flip angle = 11°, NEX = 1, matrix = 256 × 256, FOV = 24 cm, slice dimensions = 1.2 × 0.9375 × 0.9375 mm, slices=146). The Siemens sites used a 12-channel head coil and parallel imaging and temporal acceleration with iPAT and acquired an MPRAGE sequence (TR = 1900 ms, TI = 900 ms, TE = 2.92 ms, flip angle = 9°, NEX = 1, matrix = 256 × 256, FOV = 24 cm, slice dimensions = 1.2 × 0.9375 × 0.9375 mm, slice=160). During resting-state scans, participants kept their eyes open and focused on a white fixation cross that appeared on a black background.

### *NCR*

Up to two runs of resting-state fMRI data for the NCR cohort were acquired using a gradient-echo-planar series acquisition procedure (TR = 2,500 ms; echo time = 27 ms; flip angle = 90°; 44 axial contiguous interleaved slices per volume; 2.8-mm slice thickness; field of view = 22 cm; 64 × 64 acquisition matrix; single-voxel volume = 3.4 mm, 3.4 mm, 2.8 mm, volumes=120 [5mins]) with whole-brain coverage on a 3-T General Electric MR 750 scanner. Subjects were instructed to lie in the scanner at rest and look at a fixation cross. A baseline-weighted anatomical image [magnetization prepared rapid acquisition gradient recalled echo sequence (MP RAGE): 124 axial slices, 1.3-mm slice thickness, field of view = 22 cm, 224 × 224 acquisition matrix] was acquired to assist with the alignment of the functional image with

normalization to stereotaxic space. Participants were instructed to lie in the scanner at rest, looking at a fixation cross.

### *NKI-Rockland cohort*

Neuroimaging data were collected on a Siemens Magnetom TrioTim syngo MR B17. We used the two ~10-minute multiband runs of resting-state fMRI (Run 1: TR = 645 ms, TE = 30 ms, multi-band factor = 4, slice thickness = 3.0 mm, FA=60°, FOV = 222 × 222 mm, voxel size=3mm × 3mm × 3mm, slices=40, volumes=900; Run 2: TR = 1400 ms, TE = 30 ms, multi-band factor = 4, slice thickness = 2.0 mm, flip angle = 65°, FOV = 224 mm × 224mm, slices = 64, volumes=404). Acquisition of the MPRAGE images followed the following scanning parameters: TR = 1,900 ms, TE = 2.52 ms, flip angle = 9°, FOV = 250mm, slice thickness = 1.0 mm, voxel size = 1.0 × 1.0 × 1.0 mm, and slices = 176). Detailed scanning parameters are provided on the NKI-Rockland website ([http://fcon\\_1000.projects.nitrc.org/indi/enhanced/mri\\_protocol.html](http://fcon_1000.projects.nitrc.org/indi/enhanced/mri_protocol.html)). During the resting-state scan, participants were asked to keep their eyes open and fixated on a fixation cross, stay still, and not think of anything in particular.

### **Preprocessing of fMRI images**

Data were preprocessed using fMRIPrep version 20.2.3, a Nipype based tool (20, 21). Each T1w (T1-weighted) volume was corrected for intensity non-uniformity using N4BiasFieldCorrection v2.1.0 (22) and skull-stripped using antsBrainExtraction.sh v2.1.0 (using the OASIS template). Brain tissue segmentation of cerebrospinal fluid, white-matter and gray-matter was performed on the brain-extracted T1w using fast (FSL 5.0.9,

RRID:SCR\_002823, Zhang, Brady, and Smith 2001). Freesurfer's recon-all was used to reconstruct brain surfaces (FreeSurfer 6.0.1, RRID:SCR\_001847, Dale, Fischl, and Sereno 1999). The previously estimated brain mask was refined with a custom variation of the method to reconcile ANTs-derived and FreeSurfer-derived segmentations of the cortical gray-matter of Mindboggle (RRID:SCR\_002438, Klein et al. 2017). Volume-based spatial normalization to MNI152NLin2009cAsym space was performed using brain-extracted versions of both T1w reference and the T1w template via nonlinear registration with antsRegistration (ANTs 2.3.3). Functional data were motion corrected using mcflirt (FSL v5.0.9) (23).

The final preprocessing steps used the xcpengine toolbox version 2.2.3 (<https://xcpengine.readthedocs.io>), and the 36-parameter + despiking functional design(24–28). Despiking refers to the removal of and interpolation over intensity outliers in each voxel's time series using AFNI's 3DDESPIKE utility(29). We then performed de-meaning and removal of any linear or quadratic trends. The 36-parameters regressed from the timeseries included the 6 motion estimates, global signal, and white matter and cerebrospinal fluid-derived time series), and then their derivatives, quadratic terms, and squares of derivatives(24, 25). Temporal filtering was performed using a bandpass filter of 0.01–0.08 Hz (first-order Butterworth filter(30)) and images were smoothed in FSL using a Gaussian-weighted kernel with 6 mm FWHM(31). We excluded subjects where <50% collected data (neuroimaging runs) were usable. Runs/subjects were excluded if they failed to complete the preprocessing pipeline. Note that while in most cases this was likely due to problems with the data, for instance missing or poor quality T1 preventing completion of the Freesurfer pipeline or missing or incorrect header information in the jsons received from the study sites, some failures may have been due to computer cluster

failures or exceeded cluster walltime limits. Given the size of the dataset we were not able to assess the reasons for such failures for all subjects.

### **Resting-state connectivity**

We examined robustness of findings across two sets of seed regions. First, primary analyses were based on seeds for the caudate nucleus, putamen, nucleus accumbens and amygdala, selected from the Harvard-Oxford probabilistic anatomical atlas (threshold  $\geq 25\%$  probability) (32).

The second set of subcortical seeds correspond to those used in our previous work(33, 34). These seeds also allowed us to examine for potential functional heterogeneity between subregions of the subcortical seeds. Seeds for the dorsal caudate (MNI:  $x = \pm 13, y = 15, z = 9$ ), ventral caudate (MNI:  $x = \pm 10, y = 15, z = 0$ ), nucleus accumbens (MNI:  $x = \pm 9, y = 9, z = -8$ ), dorsal putamen (MNI:  $x = \pm 28, y = 1, z = 3$ ) and ventral putamen (MNI:  $x = \pm 20, y = 12, z = -3$ ) were adopted from work by Di Martino and colleagues(25). We included ventral (MNI:  $x = \pm 21, y = -3, z = -23$ ) and dorsal (MNI:  $x = \pm 21, y = -4, z = -13$ ) seeds for the amygdala. These corresponded with the basolateral and centromedial amygdala, respectively(36). Mean timeseries were extracted from voxels included within 5mm radius spherical masks placed around the central coordinates for each region of interest.

Mean region of interest timeseries were then correlated with the timeseries of each cortical and subcortical gray matter voxel in the brain, thereby creating subject-level voxelwise connectivity maps for each region of interest, which were subsequently Fisher-z transformed.

We found that ADHD-related connectivity patterns were similar across the different striatal seeds. This suggests that these seeds are sharing a considerable amount of variance in their time-series, and results are therefore non-specific. Therefore, partial correlation analyses were performed to test for potentially more direct associations. Specifically, for the Harvard-Oxford seeds, we examined associations between the seed timeseries and the remaining voxels of the brain while controlling for the timeseries of the remaining three seed regions. This modeling was performed using the `ppcor` package for R(37).

In the first instance, we examined bilateral seed regions. However, in follow-up analyses we also examined for potential hemispheric heterogeneity using hemispheric-specific seeds for the Harvard-Oxford regions of interest.

## **Modeling approach**

### *Mixed-model mega-analysis*

Prior to analysis, race and ethnicity variables were re-coded to the following categories: non-Hispanic White, Hispanic/Latino, Black/African American, Mixed/Other/Declined/Missing, Asian). Socioeconomic status (household income) was re-coded as follows: <\$50,000, \$50,000-\$100,000, \$100,001-\$200,000, >\$200,000. The primary model was based on the following syntax in the `lmerTest` (version 3.1-3) package(38), where Y is replaced by each voxel as part of a simple for-loop in R.

```
m1 <- lmer(Y ~ ADHD_controls + Age + Sex + Minutes +  
CBCL_internalizing_raw_score + CBCL_externalizing_raw_score + SES + race_ethnicity +  
MeanRMS + I(MeanRMS^2) + (1|Study/Scanner-ID/family_ID), data=group_dataframe)
```

For the CBCL model, similar syntax was used.

```
m1 <- lmer(Y ~ CBCL_Attention_Problems_Raw_score + Age + Sex + Minutes  
+ CBCL_internalizing_raw_score + CBCL_externalizing_raw_score + SES + race_ethnicity +  
MeanRMS + I(MeanRMS^2) + (1|Study/Scanner-ID/family_ID), data=CBCL_dataframe)
```

Within the group-level voxelwise images, t-values were converted to z values with Huggett's transform(39). Effect sizes maps were also generated. Effect sizes were estimated from the mixed-effects models t-values using the package *effectsize* (version 0.5) for R (40). Cohen's d was estimated for case-control comparisons, and partial-r was calculated for associations with CBCL (40).

We were concerned that inclusion of the three CBCL subscales in the model would produce multicollinearity. To test this, we ran models on extracted significant clusters and examined the variance inflation factor (VIF) using the *car* package (41). All VIF <5.

We used the linear hypothesis function from the *car* package to test whether the strength of the associations between Fisher-z transformed correlation coefficients at each voxel and raw scores on the Attention Problems scale differed significantly from those involving Fisher-z transformed correlation coefficients and the Internalizing and Externalizing broadband scales.

Example syntax, applied at each voxel, is given below for the comparison between CBCL\_Attention\_Problems\_Raw\_score and CBCL\_internalizing\_raw\_score.

linearHypothesis(m1, " CBCL\_Attention\_Problems\_Raw\_score -  
CBCL\_internalizing\_raw\_score = 0").

Resultant voxelwise chi-square statistics were transformed to z-scores, to facilitate image thresholding.

Group-level statistical maps were thresholded using Gaussian random field theory via FSL's Cluster command(31). AFNI's @chauffeur\_afni and custom code was used to generate brain images and results tables ([https://afni.nimh.nih.gov/pub/dist/doc/program\\_help/@chauffeur\\_afni.html](https://afni.nimh.nih.gov/pub/dist/doc/program_help/@chauffeur_afni.html)). Supplementary images were also created using DPABI(42).

### **Sensitivity analyses and robustness checks**

To ensure the robustness of the findings, several sensitivity analyses and robustness checks were conducted. To remove the correlation between ADHD diagnosis/Attention Problem scores and in-scanner motion, we employed a greedy matching algorithm(43). In each loop, the correlations between ADHD diagnosis or attention problems and mean-RMS and mean-RMS<sup>2</sup> were calculated excluding each subject one at a time, and the subject whose exclusion resulted in the biggest decrease in correlation coefficients was removed from the sample. The algorithm stopped when associations with both mean-RMS and mean-RMS<sup>2</sup>  $p \geq 0.5$ .

As estimated intelligence may in part be impacted by ADHD, and not just temporally antecedent, we performed analyses both with and without this covariate. The covariate was calculated by z-scoring either measures of intelligence quotient (IQ; NCR, HBN, NKI-Rockland



and NCANDA datasets) or scaled matrix (ABCD, HCP cohorts) within cohort, depending on the metric that was available(44).

Psychostimulants are widely held to act via a modulation of functioning within fronto-striatal circuits(45, 46). We therefore examined whether findings held in psychostimulant-free youth with ADHD. By examining this specific subgroup, we aimed to explore the potential neural mechanisms underlying ADHD beyond the influence of medication.

### **Associations with neuropsychological task performance.**

We focus on cognitive features consistently associated with ADHD through meta-analyses, namely working memory, processing speed, attention/interference control and impulsive decision making(47–55). These cognitive domains have also been tied to subcortico-cortical functioning(45, 46, 56–58). Performance in the working memory, processing speed, interference control domains was tested using composite variables from the NIH toolbox(59). The specific modules used were the List Sorting Working Memory module (working memory), the Pattern Comparison Processing Speed module (processing speed), and the Flanker Inhibitory Control & Attention module (attention and interference control). Decision making impulsivity was measured using the Cash Choice task. The single-item Cash Choice Task, a measure of delayed reward discounting, asked children, 'Let's pretend a kind person wanted to give you some money. Would you rather have \$75 in three days or \$115 in 3 months?'. We chose to use this measurement of decision making in place of the delay discounting task collected in later waves of the ABCD study because it aligned with the age of participants during scanning.

Models examining associations between neuropsychological and subcortical-cortical connectivity took the following form, where Y is replaced by each voxel as part of a simple for loop.

neurosyech\_parameter is replaced by the neuropsychology parameter for each cognitive domain.

```
m1 <- lmer(Y ~ neurosyech_parameter+ Age + Sex +SES+ race_eth +
```

```
Minutes+MeanRMS+I(MeanRMS^2)+(1|Scanner-ID/family_ID), data=neurosyech_dataframe)
```

### **Forest plots for brain findings**

Mean Fisher-z values for each significant cluster were extracted for each subject, and we re-ran models within each cohort to produce mega-analytic forest plots. Importantly, the data contained in the plots were extracted from clusters that were already found to be significant in the whole-brain analyses. In addition, the plots are based on extracted cluster data whereas the primary analysis was performed separately at each voxel. Therefore, these plots were produced only to illustrate the relative influence of each dataset in driving the significant associations and do not themselves provide exact representations of the tests performed in the primary analyses.

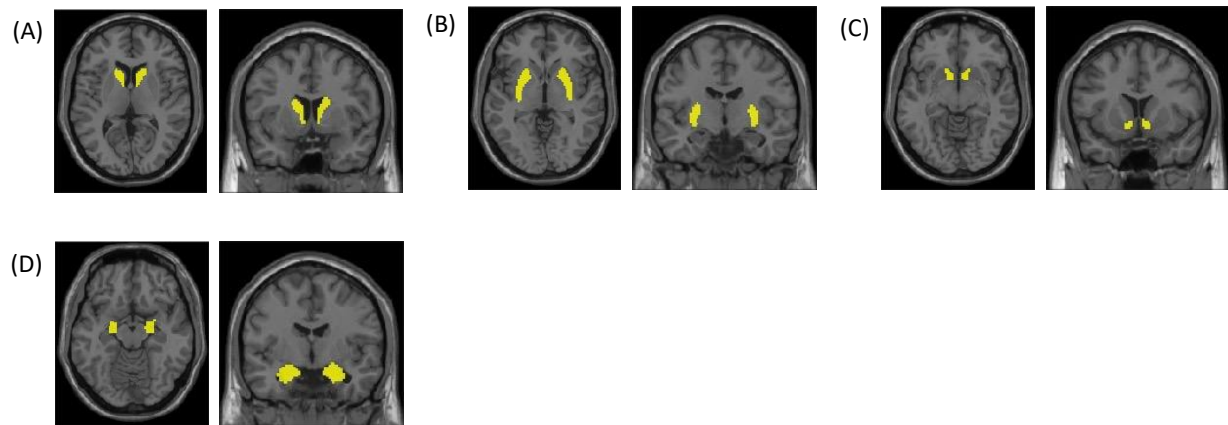

**FIGURE S1.** Shows the spatial locations of the Harvard-Oxford subcortical seeds used in primary analyses. (A) Caudate. (B) Putamen. (C) Nucleus Accumbens. (D) Amygdala.

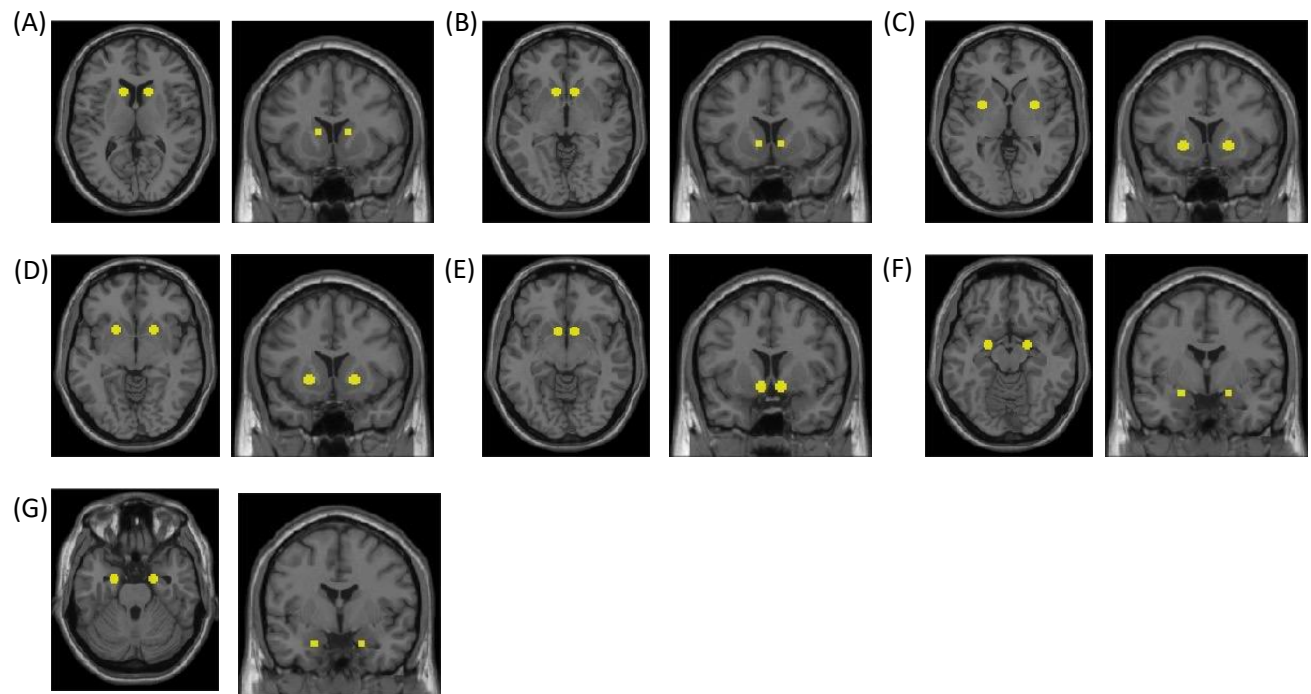

**FIGURE S2.** Shows the spatial locations of the alternative subcortical seed definitions. (A) Dorsal Caudate. (B) Ventral Caudate. (C) Dorsal Putamen (D) Ventral Putamen (E) Nucleus Accumbens (F) Dorsal Amygdala (G) Ventral Amygdala. DiMartino et al (35) and Gianaros et al (36) provide detailed discussions on how these region of interest seeds were created and defined.

## SUPPLEMENTARY RESULTS

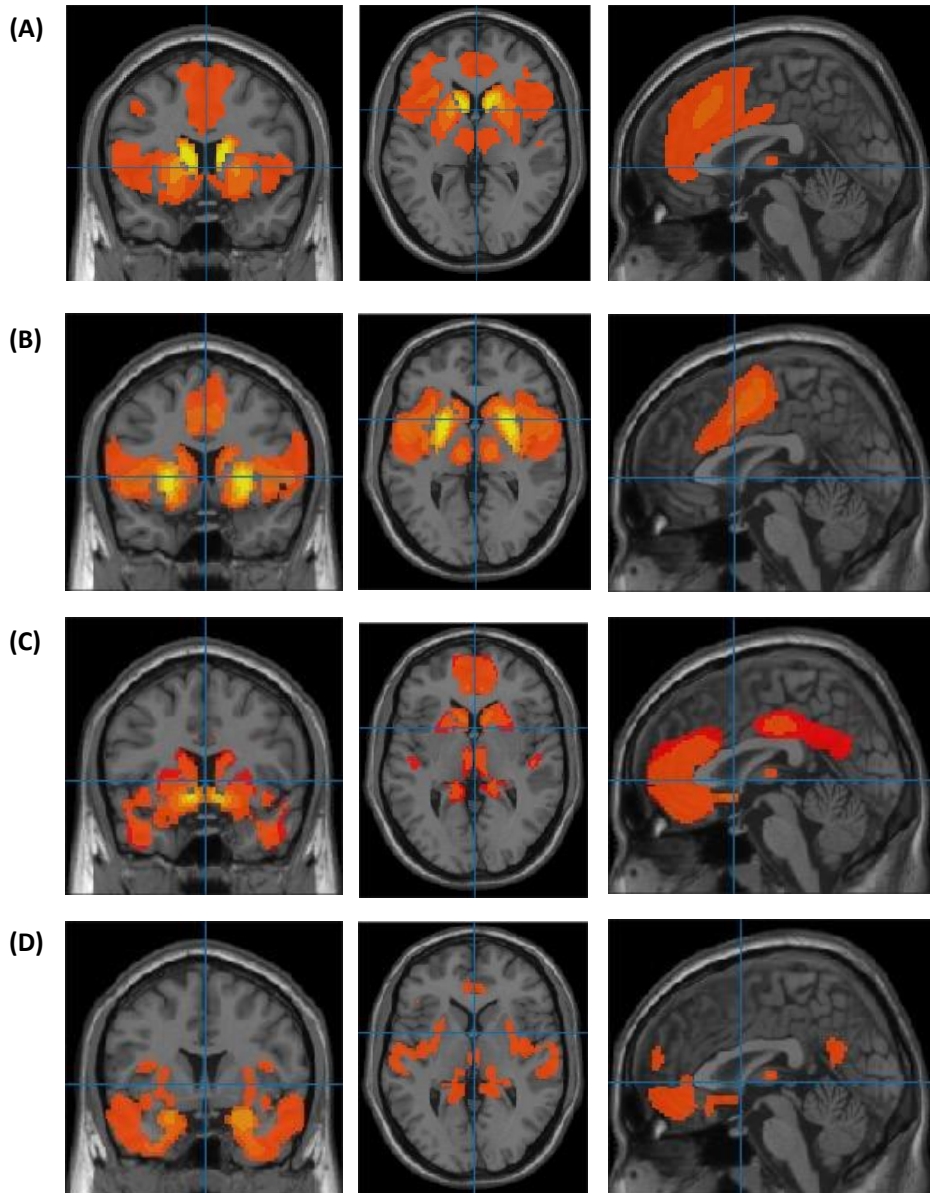

**FIGURE S3.** Results of one-sample t-tests across all N=9980 subjects. Shows the group average top 15% most connected voxels for each Harvard-Oxford subcortical seed region. (A) Caudate. (B) Putamen. (C) Nucleus Accumbens. (D) Amygdala.

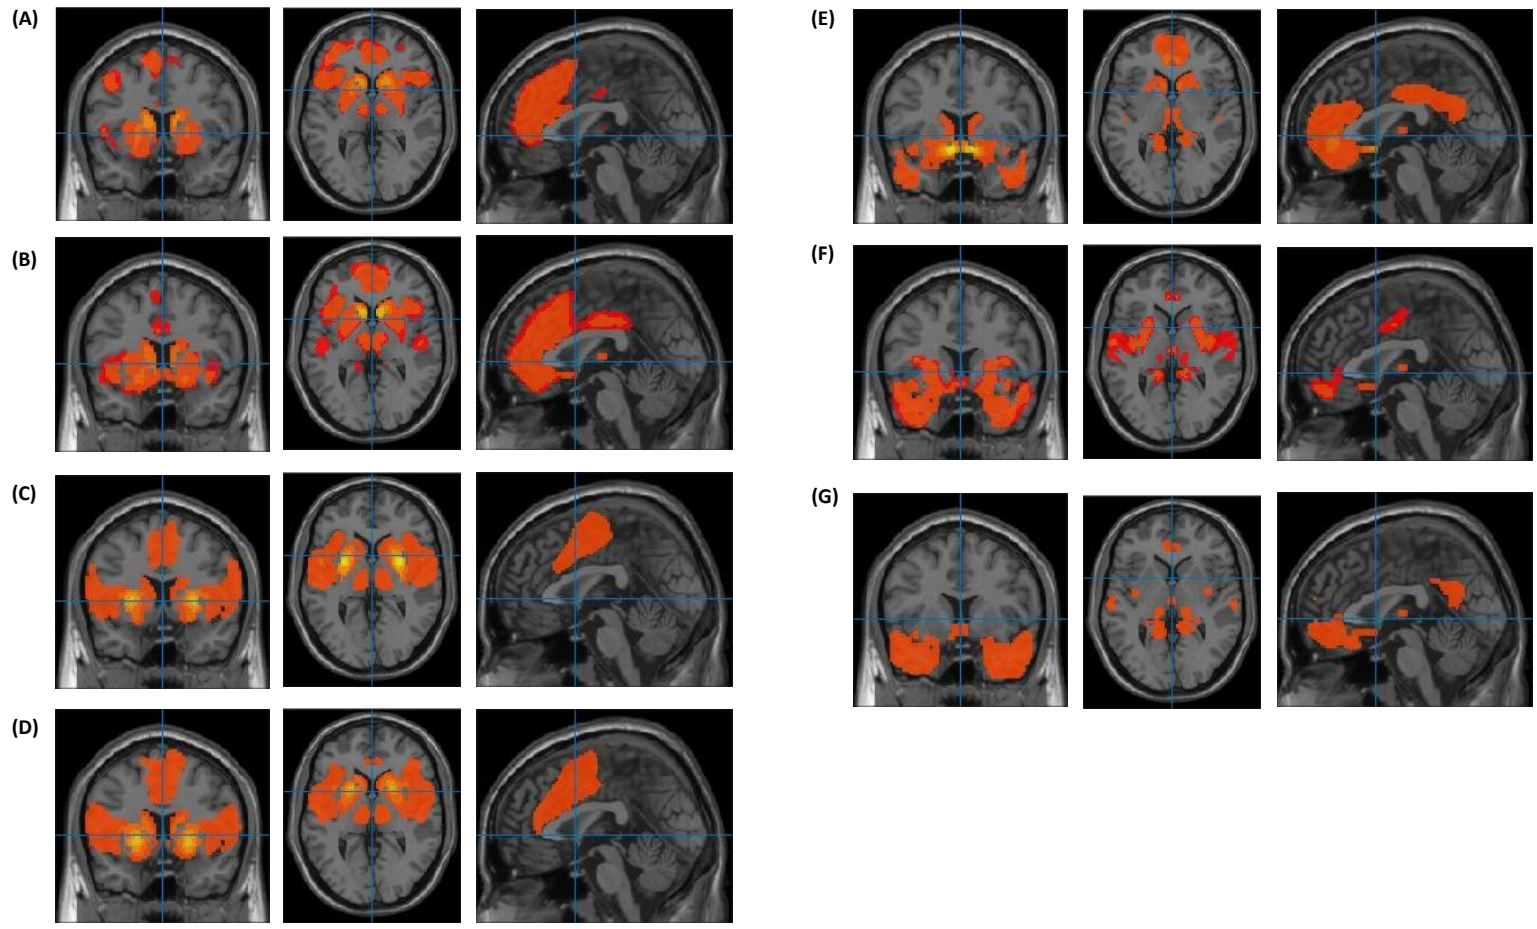

**FIGURE S4.** Results of one-sample t-tests across all N=9980 subjects. Shows the group average top 15% most connected voxels for each of the alternative subcortical seed region. **(A)** Dorsal Caudate. **(B)** Ventral Caudate. **(C)** Dorsal Putamen **(D)** Ventral Putamen **(E)** Nucleus Accumbens **(F)** Dorsal Amygdala **(G)** Ventral Amygdala.



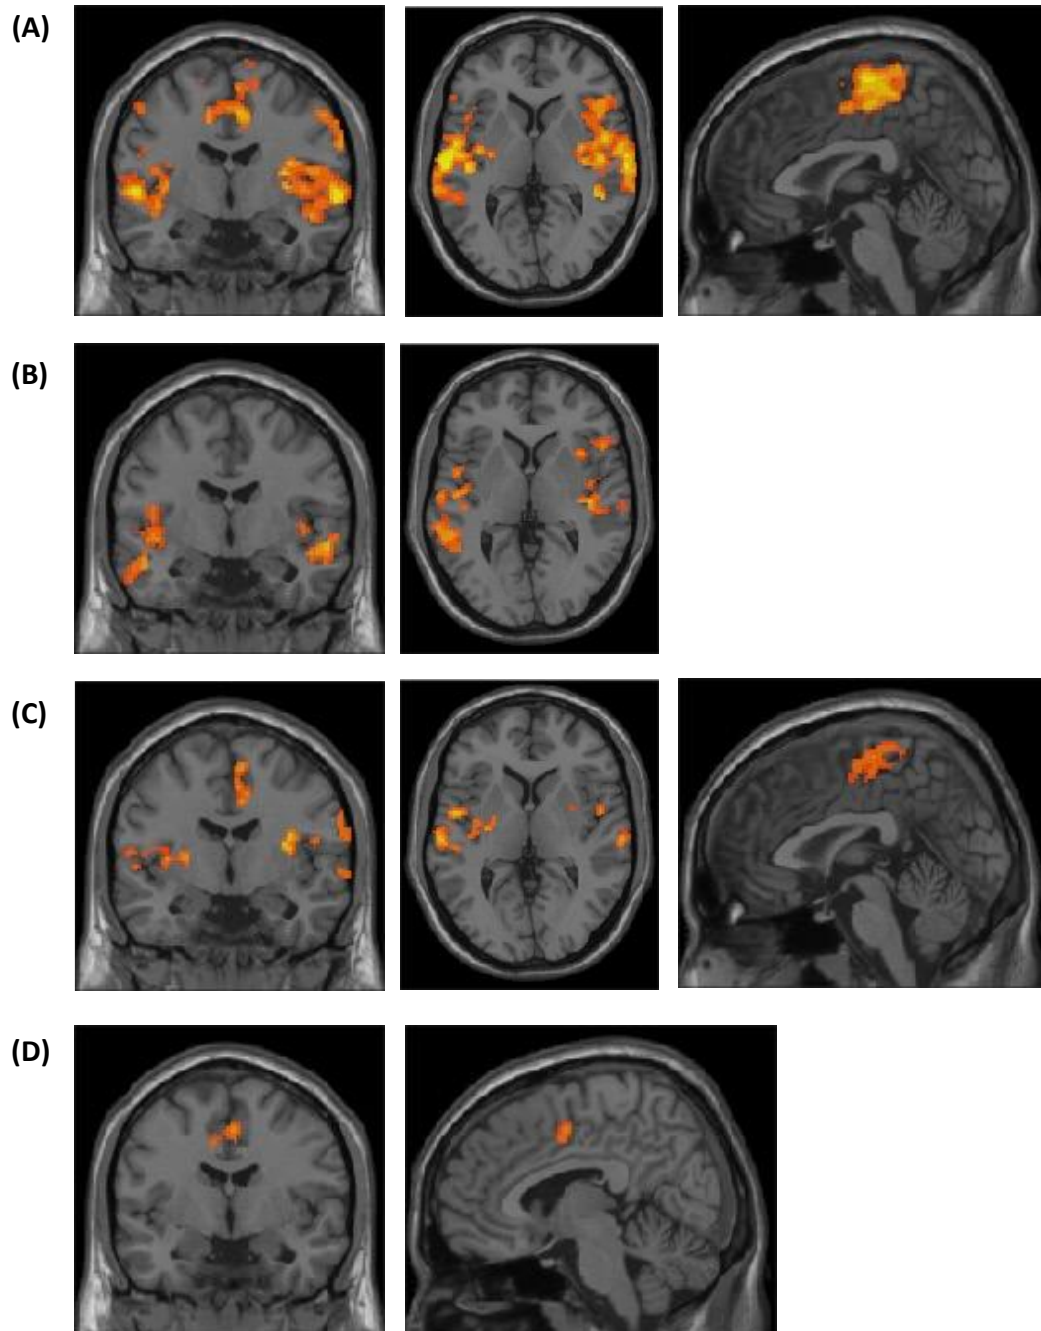

**FIGURE S5.** Alternative presentation of findings from a mega-analysis of differences in seed-based subcortico-cortical connectivity in youth with attention deficit/hyperactivity disorder (ADHD) and unaffected controls. **(A)** Caudate. **(B)** Putamen. **(C)** Nucleus Accumbens. **(D)** Amygdala.

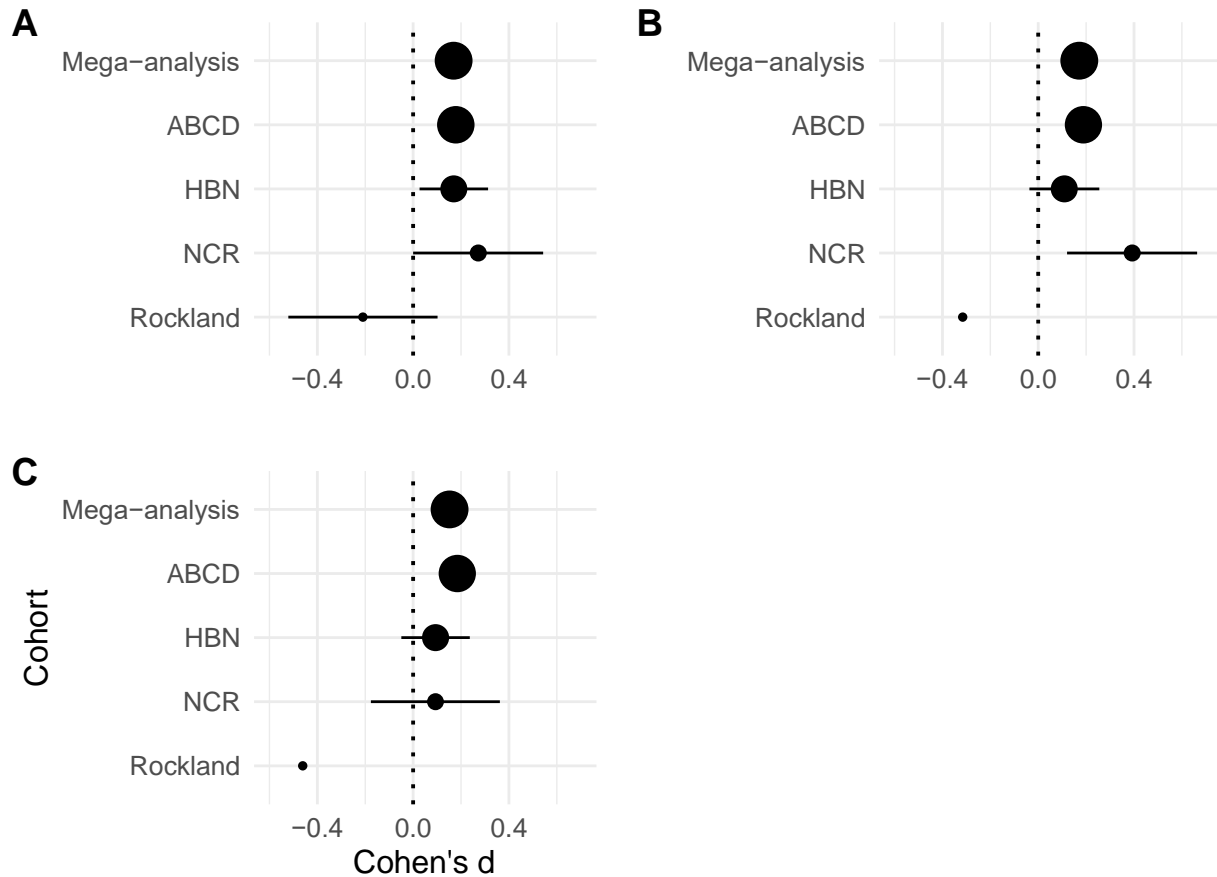

**FIGURE S6.** Forest plot showing the group difference in functional connectivity between the caudate seed and (a) right temporal lobe/insula/inferior frontal gyrus, (b) left temporal lobe/insula/inferior frontal gyrus and (c) bilateral supplementary motor cortex/precentral/postcentral gyrus. Note that at the primary threshold of  $p < 0.0001$ , these regions formed a single large cluster. Therefore, thresholding was performed at  $< 0.00001$  for the purposes of plotting discrete clusters.



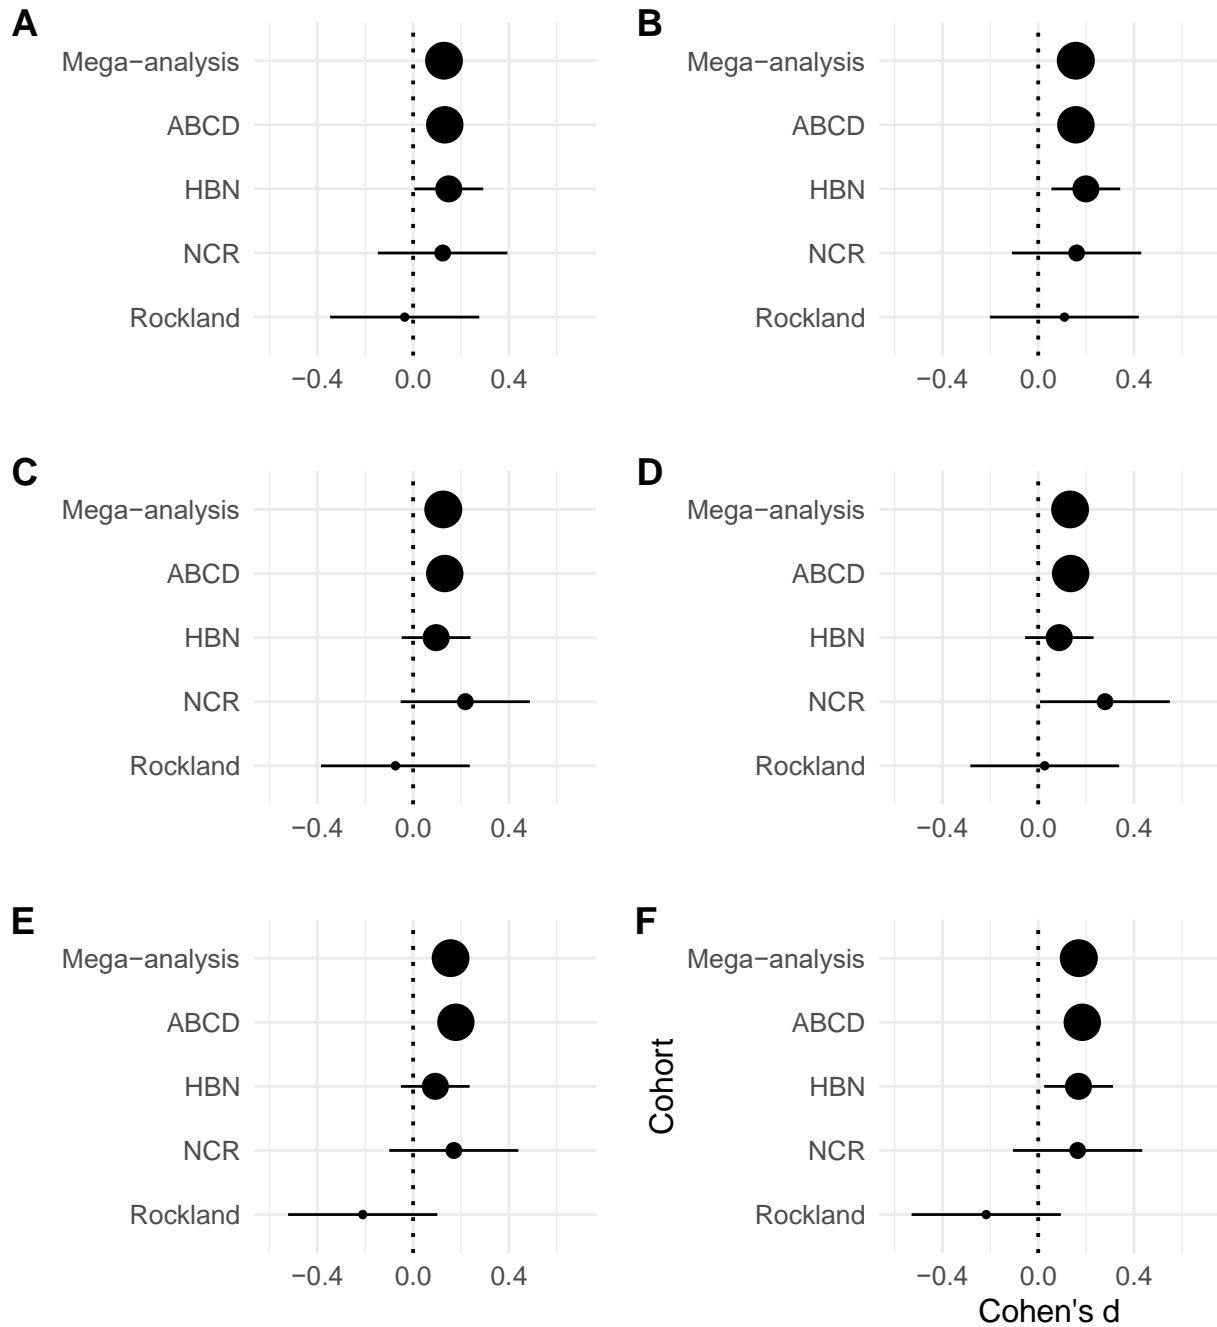

**FIGURE S7.** Forest plot showing the group difference in functional connectivity between the putamen seed and (a) right inferior frontal gyrus, (b) right inferior frontal gyrus/insula/temporal gyrus, (c) right precentral/postcentral gyrus, (d) left inferior parietal lobe/precentral gyrus/postcentral gyrus, (e) right superior temporal gyrus/middle temporal gyrus, (f) left superior temporal gyrus/middle temporal gyrus.

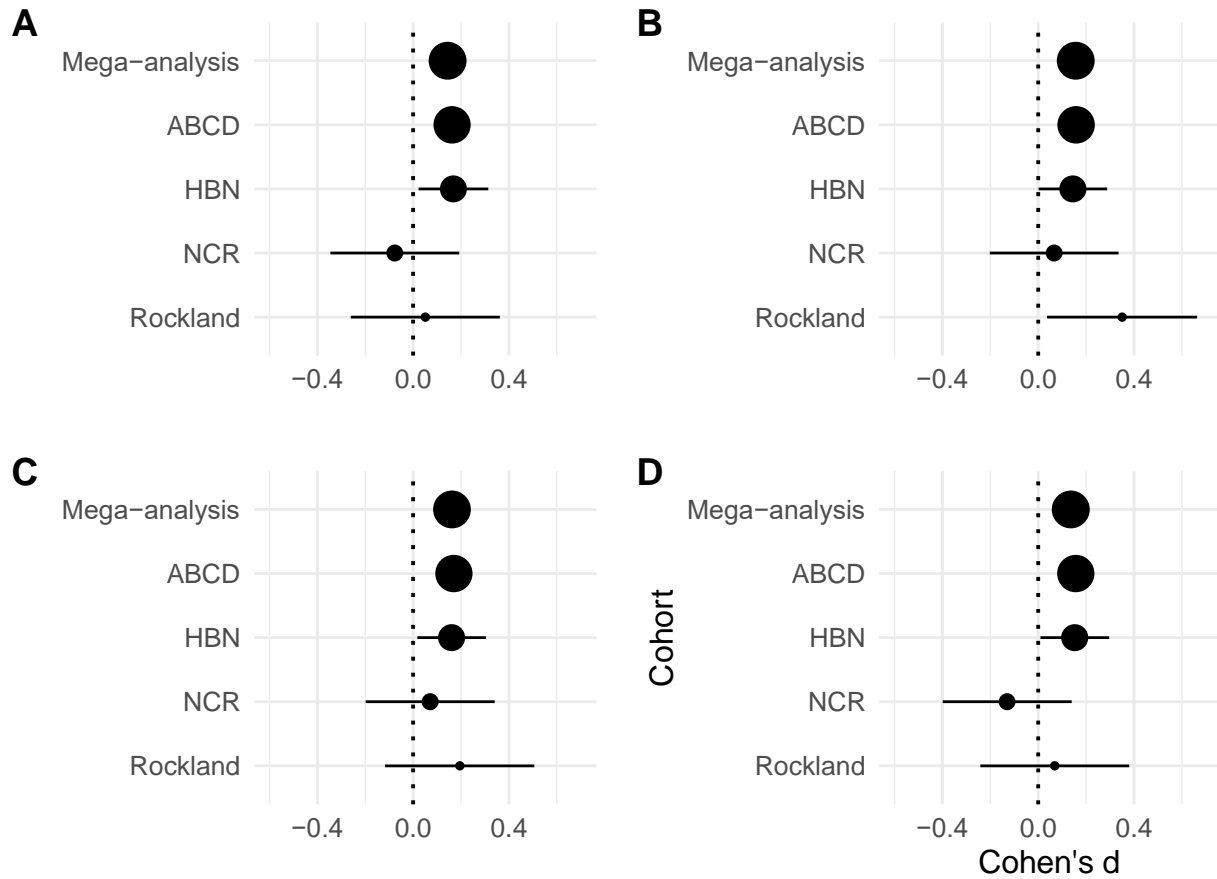

**FIGURE S8.** Forest plot showing the group difference in functional connectivity between the nucleus accumbens seed and (a) left precentral gyrus, (b) left superior temporal gyrus/insula/putamen, (c) right precentral gyrus/postcentral gyrus/insula/superior temporal gyrus, (d) supplementary motor area/precentral gyrus/postcentral gyrus.

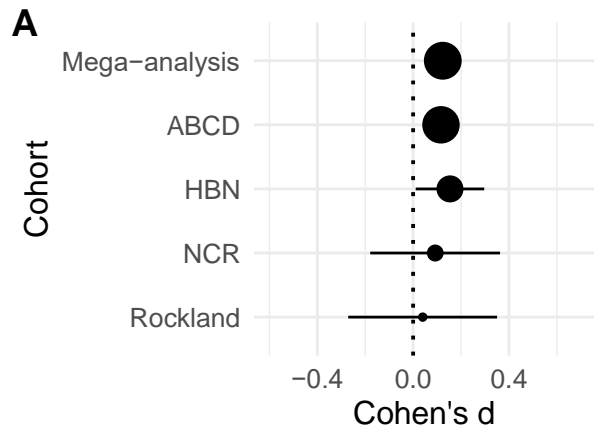

**FIGURE S9.** Forest plot showing the group difference in functional connectivity between the amygdala seed and (a) bilateral cingulate gyrus/left superior frontal gyrus.

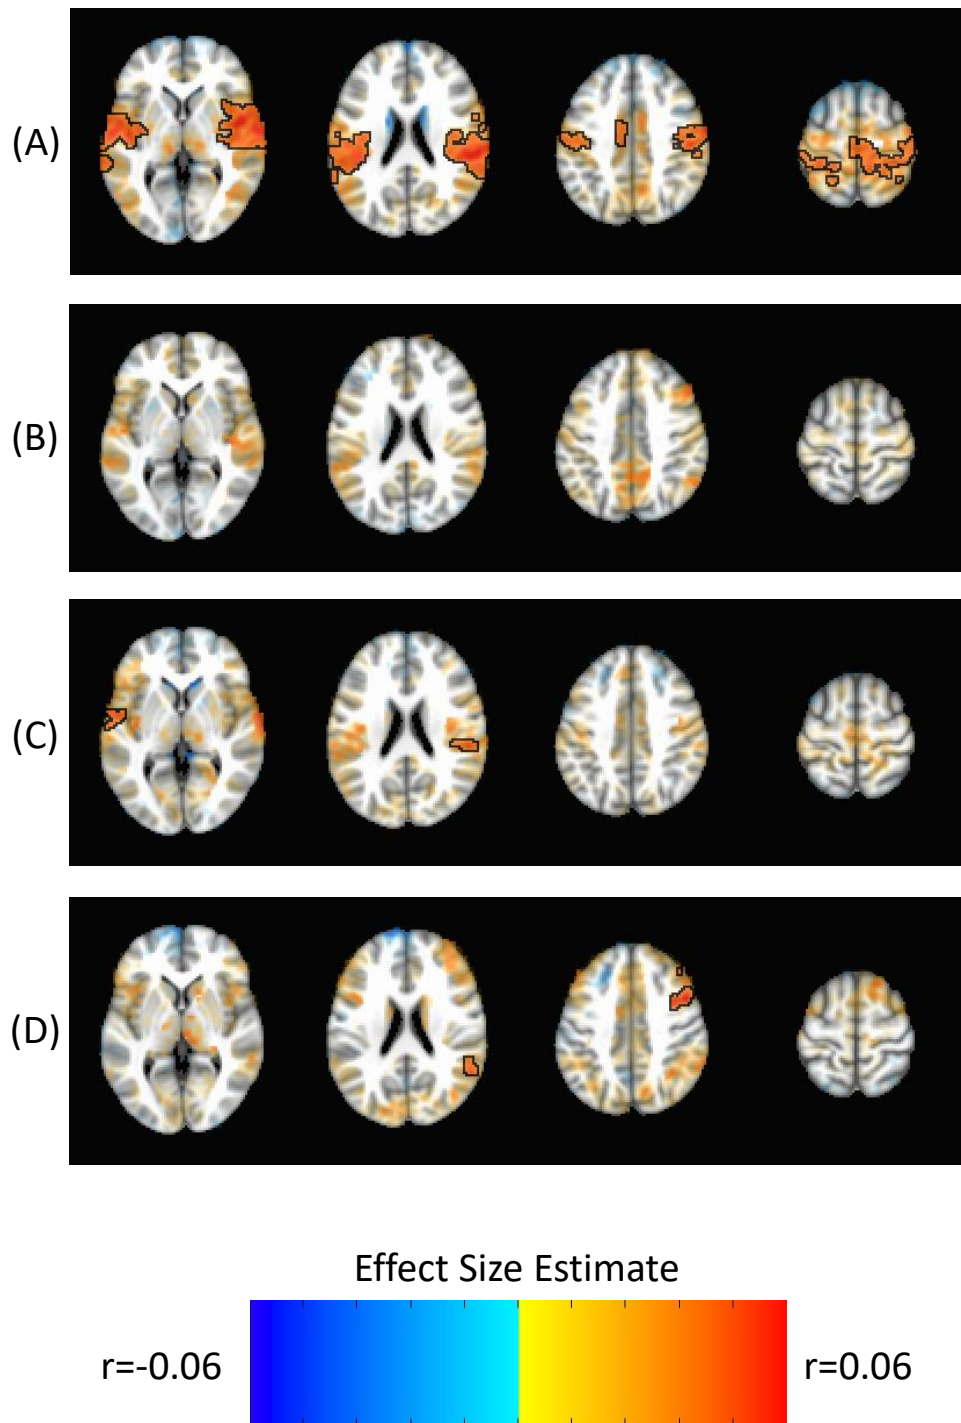

**FIGURE S10.** Findings from a mega-analysis of associations between seed-based subcortico-cortical connectivity and scores on the Attention Problems scale. **(A)** Caudate. **(B)** Putamen. **(C)** Nucleus Accumbens. **(D)** Amygdala. Positive effect sizes indicate ADHD>controls. Voxels in significant clusters are opaque and boxed. Subthreshold voxels are presented translucently.

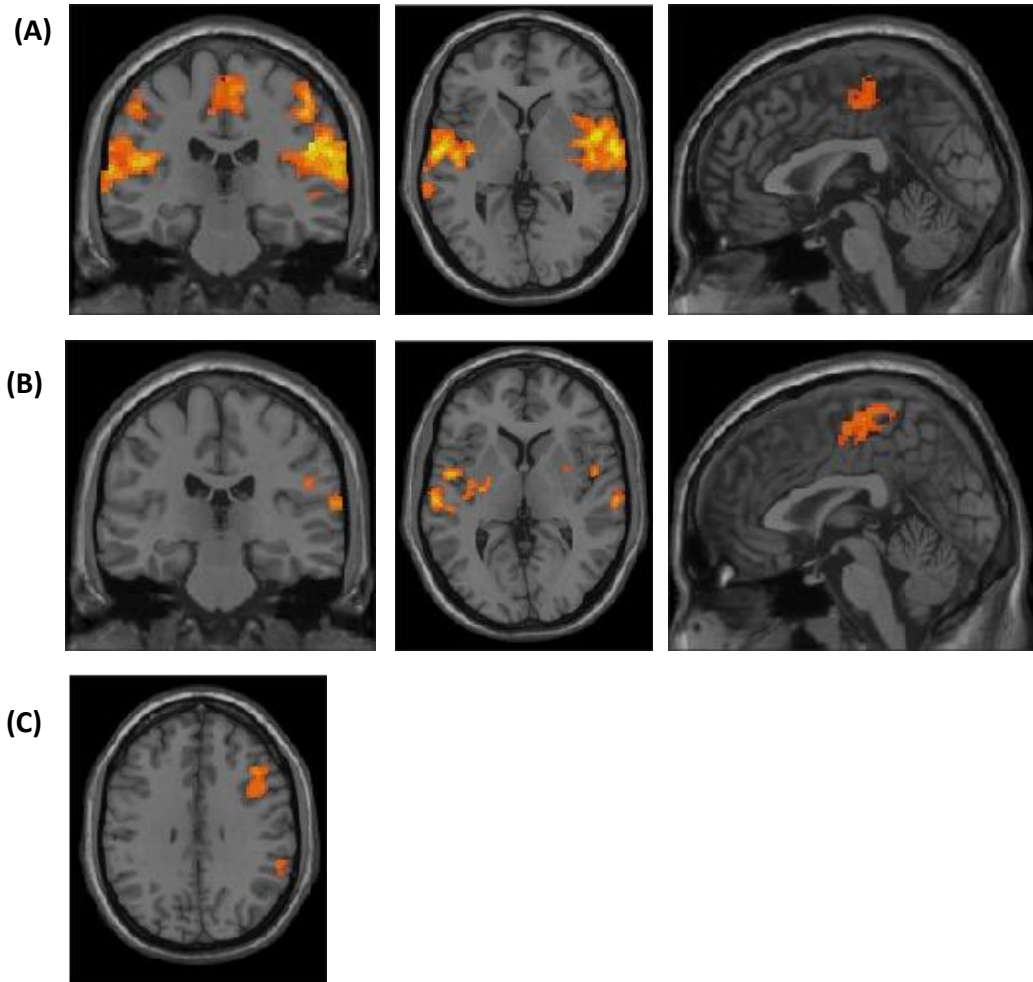

**FIGURE S11.** Findings from a mega-analysis of associations between seed-based subcortico-cortical connectivity and scores on the Attention Problems scale. **(A)** Caudate. **(B)** Nucleus Accumbens. **(C)** Amygdala. Positive effect sizes indicate ADHD>controls.

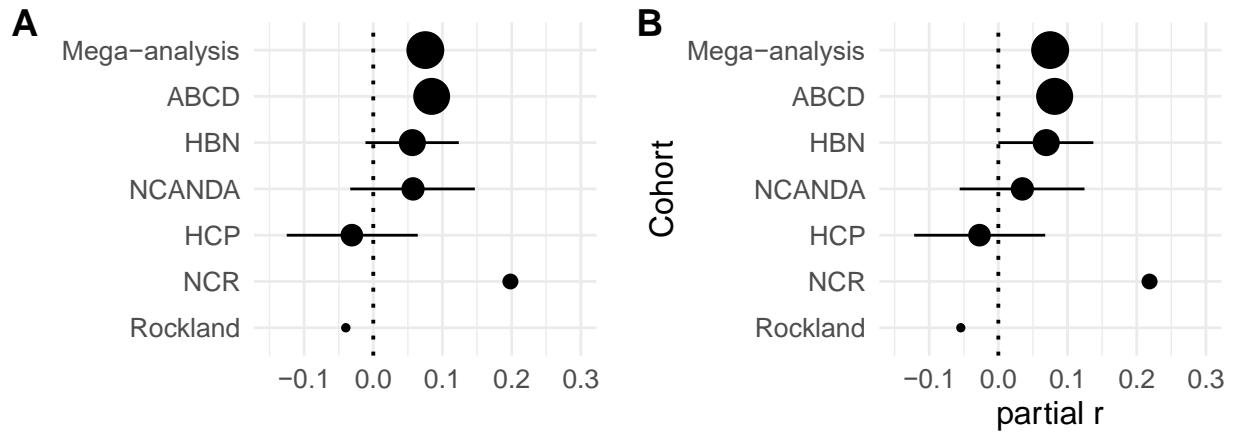

**FIGURE S12.** Forest plot showing the associations between scores on the Attention Problems Scale and functional connectivity between the caudate and (a) left superior temporal gyrus/postcentral gyrus/insula, (b) right superior temporal gyrus/postcentral gyrus/insula.

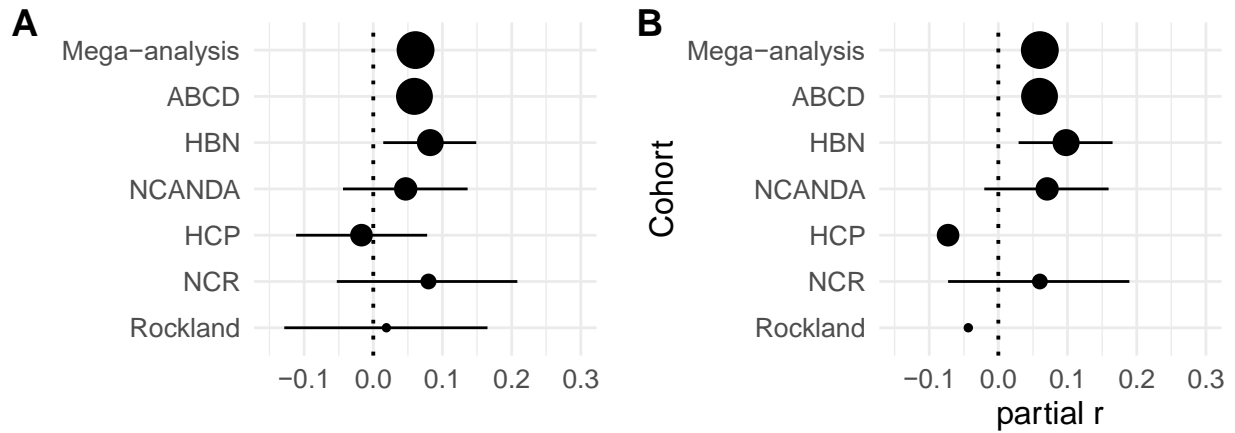

**FIGURE S13.** Forest plot showing the associations between scores on the Attention Problems Scale and functional connectivity between the nucleus accumbens and (a) left superior temporal gyrus/precentral gyrus/insula, (b) right inferior parietal lobe/superior temporal gyrus/postcentral gyrus/insula.

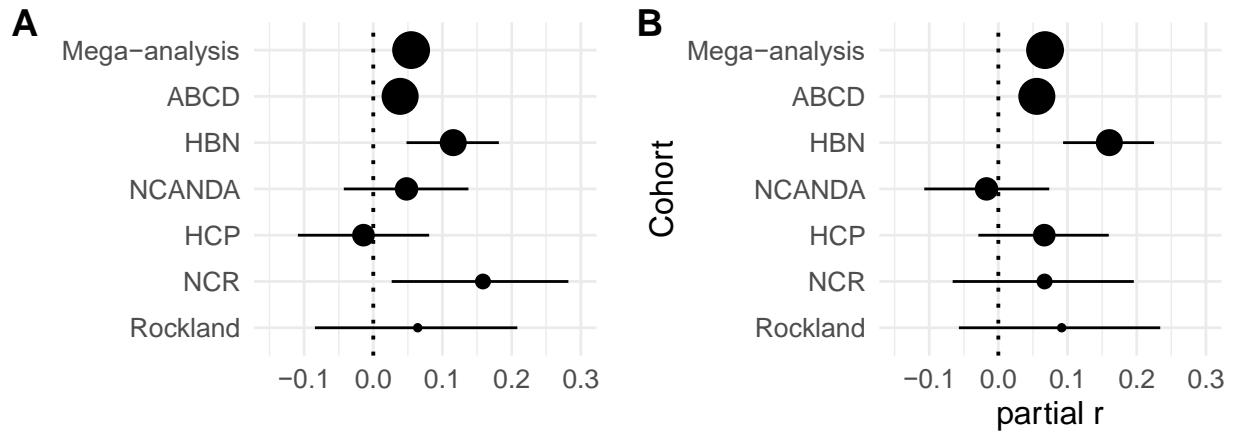

**FIGURE S14.** Forest plot showing the associations between scores on the Attention Problems Scale and functional connectivity between the amygdala and (a) right supramarginal gyrus/right superior temporal gyrus/right inferior parietal lobe, (b) right middle frontal gyrus/right precentral gyrus.



**TABLE S1. Significant associations between Attention Problems scores and subcortico-cortical connectivity. n= 9890.**

| Cluster                  | X   | Y   | Z  | Peak<br><i>partial-r</i> | Mean<br><i>partial-r</i> | Size<br>(voxels) | Overlap                            | Talairach label                |
|--------------------------|-----|-----|----|--------------------------|--------------------------|------------------|------------------------------------|--------------------------------|
| <b>Bilateral Caudate</b> |     |     |    |                          |                          |                  |                                    |                                |
| 1                        | 50  | -1  | -1 | 0.07                     | 0.04                     | 7338             | 20.70%                             | Right Superior Temporal Gyrus  |
|                          |     |     |    |                          |                          |                  | 18.40%                             | Right Postcentral Gyrus        |
|                          |     |     |    |                          |                          |                  | 13.90%                             | Right Insula                   |
|                          |     |     |    |                          |                          |                  | 11.00%                             | Right Precentral Gyrus         |
|                          |     |     |    |                          |                          |                  | 6.80%                              | Right Inferior Parietal Lobule |
|                          |     |     |    |                          |                          |                  | 2.90%                              | Right Paracentral Lobule       |
|                          |     |     |    |                          |                          |                  | 2.50%                              | Left Medial Frontal Gyrus      |
|                          |     |     |    |                          |                          |                  | 1.90%                              | Right Medial Frontal Gyrus     |
| 2                        | -59 | -13 | 10 | 0.07                     | 0.04                     | 4599             | 33.70%                             | Left Superior Temporal Gyrus   |
|                          |     |     |    |                          |                          |                  | 17.70%                             | Left Postcentral Gyrus         |
|                          |     |     |    |                          |                          |                  | 12.50%                             | Left Insula                    |
|                          |     |     |    |                          |                          |                  | 7.50%                              | Left Inferior Parietal Lobule  |
|                          |     |     |    |                          |                          |                  | 7.40%                              | Left Precentral Gyrus          |
|                          |     |     |    |                          |                          |                  | 4.80%                              | Left Middle Temporal Gyrus     |
|                          |     |     |    |                          |                          |                  | 2.90%                              | Left Transverse Temporal Gyrus |
|                          |     |     |    |                          |                          |                  | <b>Bilateral Nucleus Accumbens</b> |                                |
| 1                        | 68  | -25 | 14 | 0.05                     | 0.04                     | 348              | 48.40%                             | Right Inferior Parietal Lobule |
|                          |     |     |    |                          |                          |                  | 23.40%                             | Right Superior Temporal Gyrus  |
|                          |     |     |    |                          |                          |                  | 11.60%                             | Right Insula                   |
|                          |     |     |    |                          |                          |                  | 10.40%                             | Right Postcentral Gyrus        |
| 2                        | -49 | -1  | 12 | 0.05                     | 0.04                     | 277              | 51.50%                             | Left Superior Temporal Gyrus   |

|                           |    |     |    |      |      |     |        |                                |
|---------------------------|----|-----|----|------|------|-----|--------|--------------------------------|
|                           |    |     |    |      |      |     | 26.50% | Left Precentral Gyrus          |
|                           |    |     |    |      |      |     | 8.80%  | Left Transverse Temporal Gyrus |
|                           |    |     |    |      |      |     | 8.70%  | Left Insula                    |
|                           |    |     |    |      |      |     | 1.40%  | Left Postcentral Gyrus         |
| <b>Bilateral Amygdala</b> |    |     |    |      |      |     |        |                                |
| 1                         | 48 | 10  | 44 | 0.06 | 0.04 | 508 | 86.40% | Right Middle Frontal Gyrus     |
|                           |    |     |    |      |      |     | 8.90%  | Right Precentral Gyrus         |
|                           |    |     |    |      |      |     | 3.00%  | Right Inferior Frontal Gyrus   |
| 2                         | 56 | -53 | 22 | 0.05 | 0.04 | 221 | 65.40% | Right Supramarginal Gyrus      |
|                           |    |     |    |      |      |     | 20.10% | Right Superior Temporal Gyrus  |
|                           |    |     |    |      |      |     | 14.40% | Right Inferior Parietal Lobule |

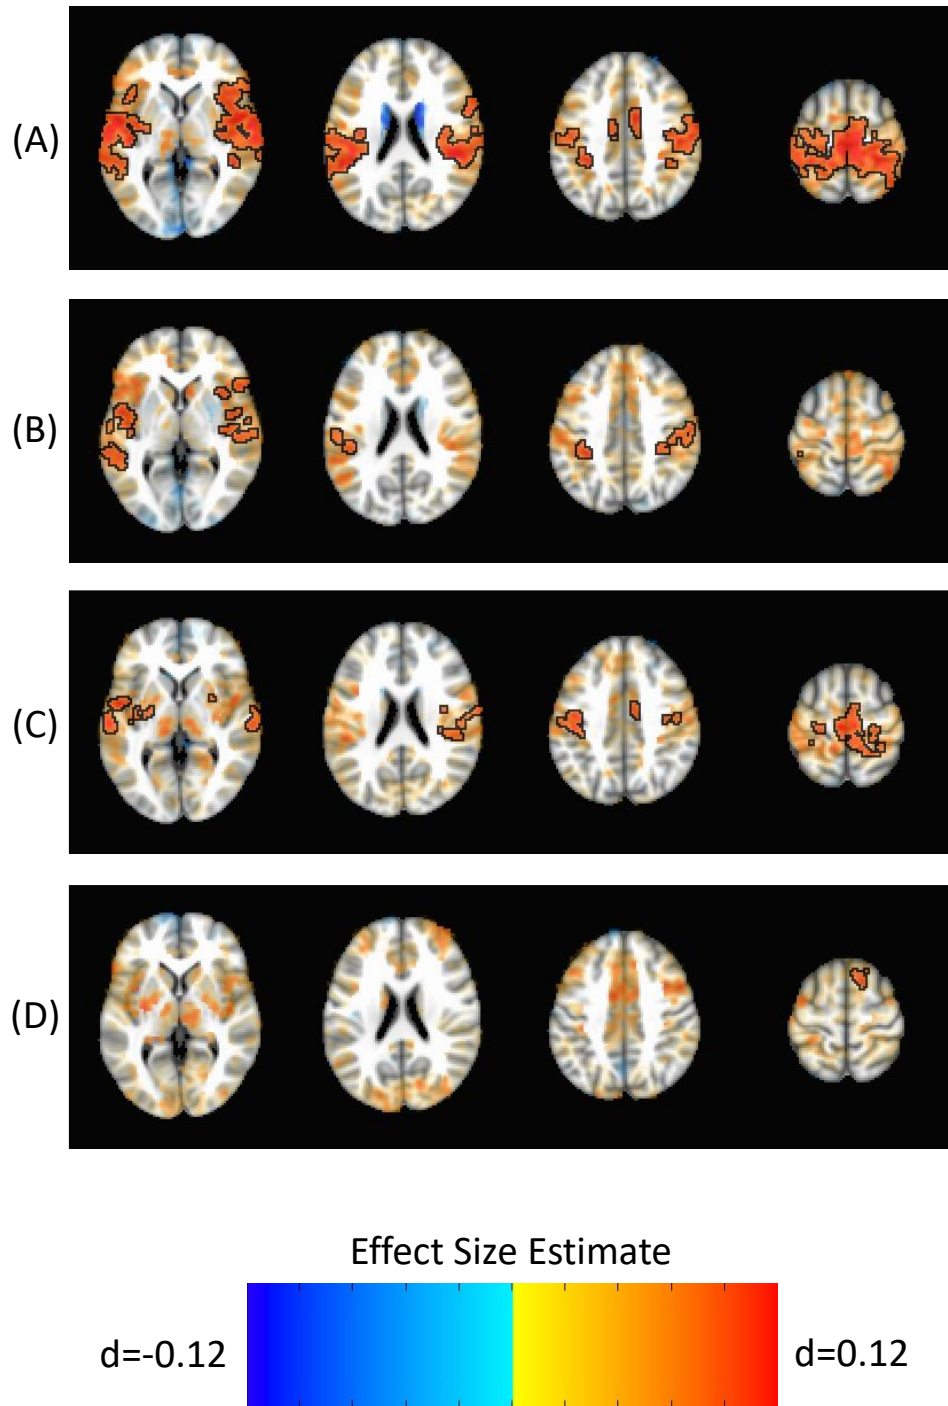

**FIGURE S15.** Findings from a mega-analysis of differences in seed-based subcortico-cortical connectivity in youth with attention deficit/hyperactivity disorder (ADHD) and unaffected control subjects after matching groups on in-scanner motion. **(A)** Caudate. **(B)** Putamen. **(C)** Nucleus Accumbens. **(D)** Amygdala. Positive effect sizes indicate ADHD>controls. Voxels in significant clusters are opaque and boxed. Subthreshold voxels are presented translucently.

**TABLE S2. Show results of case-control comparison after matching groups on in-scanner motion. n=1642 patients with ADHD and n=6737 unaffected controls.**

| Cluster                  | X   | Y  | Z  | Peak- <i>d</i> | Mean- <i>d</i> | Size (voxels) | Overlap | Talairach label                |
|--------------------------|-----|----|----|----------------|----------------|---------------|---------|--------------------------------|
| <b>Bilateral Caudate</b> |     |    |    |                |                |               |         |                                |
| 1                        | 64  | -7 | -3 | 0.16           | 0.10           | 18389         | 9.70%   | Left Superior Temporal Gyrus   |
|                          |     |    |    |                |                |               | 8.70%   | Right Superior Temporal Gyrus  |
|                          |     |    |    |                |                |               | 8.40%   | Right Postcentral Gyrus        |
|                          |     |    |    |                |                |               | 6.10%   | Left Postcentral Gyrus         |
|                          |     |    |    |                |                |               | 6.10%   | Right Insula                   |
|                          |     |    |    |                |                |               | 5.00%   | Right Precentral Gyrus         |
|                          |     |    |    |                |                |               | 4.20%   | Left Insula                    |
|                          |     |    |    |                |                |               | 3.80%   | Left Precentral Gyrus          |
|                          |     |    |    |                |                |               | 3.20%   | Right Inferior Parietal Lobule |
|                          |     |    |    |                |                |               | 2.90%   | Right Medial Frontal Gyrus     |
|                          |     |    |    |                |                |               | 2.80%   | Left Inferior Parietal Lobule  |
|                          |     |    |    |                |                |               | 2.70%   | Left Middle Temporal Gyrus     |
|                          |     |    |    |                |                |               | 2.30%   | Left Medial Frontal Gyrus      |
|                          |     |    |    |                |                |               | 2.00%   | Right Inferior Frontal Gyrus   |
|                          |     |    |    |                |                |               | 1.70%   | Right Paracentral Lobule       |
|                          |     |    |    |                |                |               | 1.60%   | Left Paracentral Lobule        |
| <b>Bilateral Putamen</b> |     |    |    |                |                |               |         |                                |
| 1                        | -51 | -3 | -1 | 0.13           | 0.09           | 2099          | 41.00%  | Left Superior Temporal Gyrus   |
|                          |     |    |    |                |                |               | 28.60%  | Left Middle Temporal Gyrus     |
|                          |     |    |    |                |                |               | 10.80%  | Left Insula                    |
|                          |     |    |    |                |                |               | 3.80%   | Left Postcentral Gyrus         |
|                          |     |    |    |                |                |               | 1.60%   | Left Inferior Temporal Gyrus   |

|                                    |     |     |     |      |      |      |        |                                 |
|------------------------------------|-----|-----|-----|------|------|------|--------|---------------------------------|
|                                    |     |     |     |      |      |      | 1.20%  | Left Precentral Gyrus           |
|                                    |     |     |     |      |      |      | 1.10%  | Left Inferior Parietal Lobule   |
|                                    |     |     |     |      |      |      | 1.00%  | Left Fusiform Gyrus             |
|                                    |     |     |     |      |      |      | 1.00%  | Left Transverse Temporal Gyrus  |
| 2                                  | 44  | -25 | 8   | 0.13 | 0.09 | 872  | 37.70% | Right Superior Temporal Gyrus   |
|                                    |     |     |     |      |      |      | 32.20% | Right Middle Temporal Gyrus     |
|                                    |     |     |     |      |      |      | 10.00% | Right Transverse Temporal Gyrus |
|                                    |     |     |     |      |      |      | 6.60%  | Right Insula                    |
|                                    |     |     |     |      |      |      | 2.90%  | Right Postcentral Gyrus         |
|                                    |     |     |     |      |      |      | 2.10%  | Right Inferior Temporal Gyrus   |
| 3                                  | 30  | 20  | -21 | 0.12 | 0.09 | 858  | 63.40% | Right Inferior Frontal Gyrus    |
|                                    |     |     |     |      |      |      | 18.00% | Right Insula                    |
|                                    |     |     |     |      |      |      | 7.10%  | Right Superior Temporal Gyrus   |
|                                    |     |     |     |      |      |      | 3.80%  | Right Uncus                     |
| 4                                  | 52  | -29 | 36  | 0.12 | 0.09 | 517  | 56.40% | Right Postcentral Gyrus         |
|                                    |     |     |     |      |      |      | 10.70% | Right Precentral Gyrus          |
|                                    |     |     |     |      |      |      | 10.00% | Right Inferior Parietal Lobule  |
| 5                                  | -31 | -39 | 44  | 0.11 | 0.09 | 409  | 49.80% | Left Inferior Parietal Lobule   |
|                                    |     |     |     |      |      |      | 3.20%  | Left Postcentral Gyrus          |
|                                    |     |     |     |      |      |      | 2.20%  | Left Superior Parietal Lobule   |
| <b>Bilateral Nucleus Accumbens</b> |     |     |     |      |      |      |        |                                 |
| 1                                  | -39 | -15 | 50  | 0.13 | 0.09 | 2020 | 17.30% | Left Postcentral Gyrus          |
|                                    |     |     |     |      |      |      | 16.90% | Right Medial Frontal Gyrus      |
|                                    |     |     |     |      |      |      | 15.90% | Left Precentral Gyrus           |

|                           |     |     |    |      |      |     |        |                                |
|---------------------------|-----|-----|----|------|------|-----|--------|--------------------------------|
|                           |     |     |    |      |      |     | 6.60%  | Left Medial Frontal Gyrus      |
|                           |     |     |    |      |      |     | 5.90%  | Right Paracentral Lobule       |
|                           |     |     |    |      |      |     | 5.10%  | Right Postcentral Gyrus        |
|                           |     |     |    |      |      |     | 3.10%  | Right Cingulate Gyrus          |
|                           |     |     |    |      |      |     | 2.30%  | Left Inferior Parietal Lobule  |
|                           |     |     |    |      |      |     | 2.30%  | Right Precentral Gyrus         |
|                           |     |     |    |      |      |     | 1.40%  | Left Paracentral Lobule        |
| 2                         | 34  | -3  | 12 | 0.13 | 0.09 | 924 | 20.20% | Right Postcentral Gyrus        |
|                           |     |     |    |      |      |     | 19.80% | Right Insula                   |
|                           |     |     |    |      |      |     | 19.40% | Right Precentral Gyrus         |
|                           |     |     |    |      |      |     | 14.50% | Right Superior Temporal Gyrus  |
|                           |     |     |    |      |      |     | 4.60%  | Right Inferior Parietal Lobule |
|                           |     |     |    |      |      |     | 3.20%  | Right Middle Temporal Gyrus    |
|                           |     |     |    |      |      |     | 2.10%  | Right Claustrum                |
| 3                         | -63 | -19 | 2  | 0.12 | 0.09 | 379 | 63.90% | Left Superior Temporal Gyrus   |
|                           |     |     |    |      |      |     | 25.00% | Left Precentral Gyrus          |
|                           |     |     |    |      |      |     | 6.30%  | Left Insula                    |
|                           |     |     |    |      |      |     | 4.20%  | Left Middle Temporal Gyrus     |
| 4                         | -29 | -11 | 8  | 0.12 | 0.09 | 258 | 38.30% | Left Insula                    |
|                           |     |     |    |      |      |     | 37.40% | Left Lentiform Nucleus         |
|                           |     |     |    |      |      |     | 5.70%  | Left Claustrum                 |
| <b>Bilateral Amygdala</b> |     |     |    |      |      |     |        |                                |
| 1                         | 8   | 20  | 56 | 0.11 | 0.09 | 204 | 81.70% | Right Superior Frontal Gyrus   |
|                           |     |     |    |      |      |     | 4.10%  | Right Medial Frontal Gyrus     |
|                           |     |     |    |      |      |     | 1.20%  | Right Middle Frontal Gyrus     |

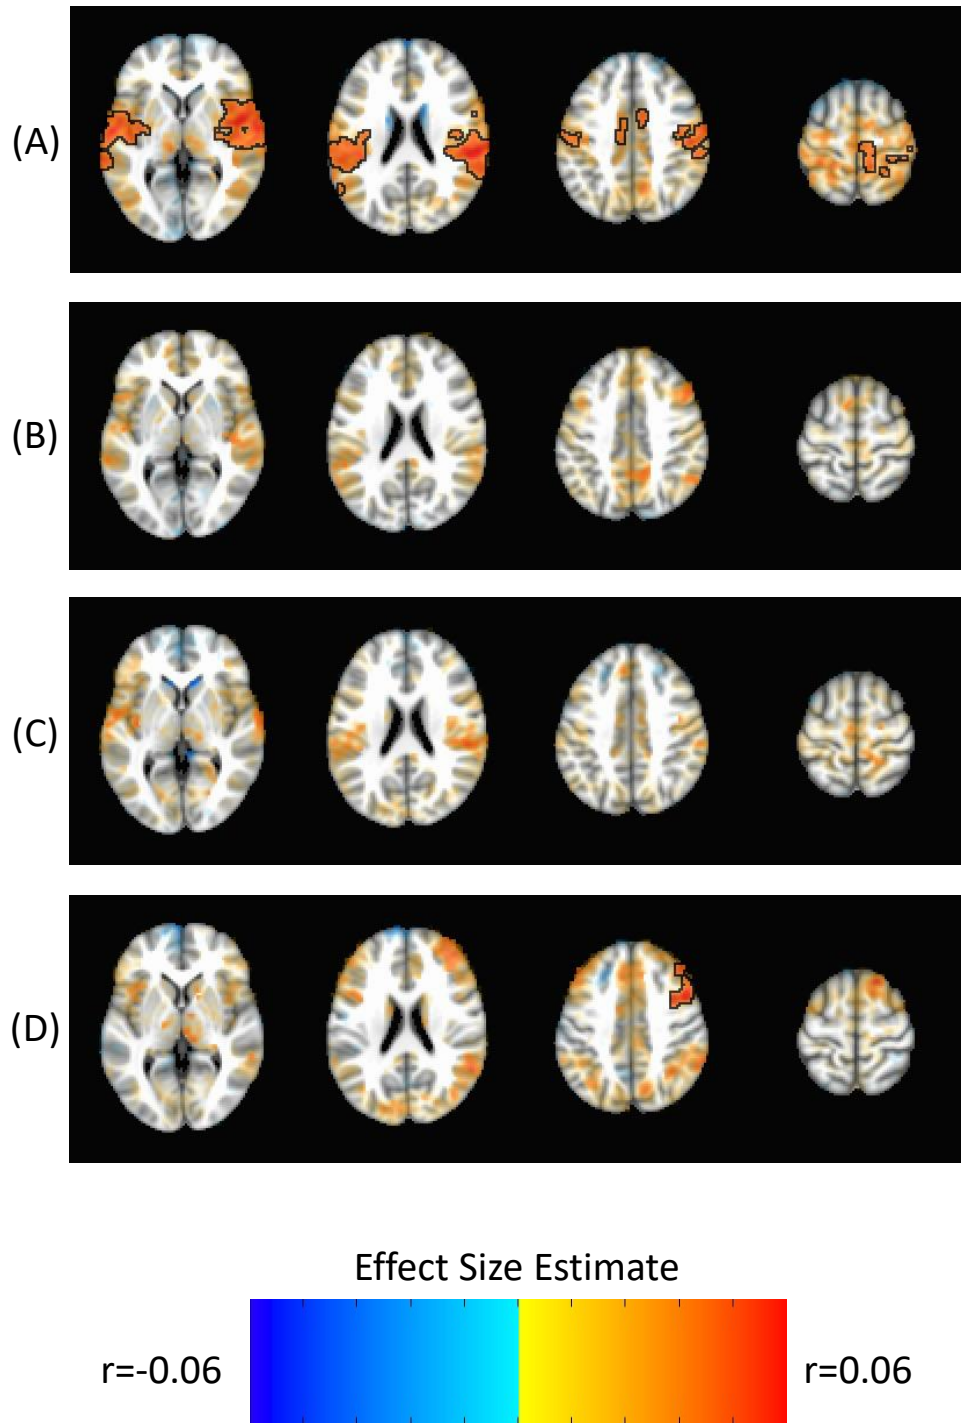

**FIGURE S16.** Findings from a mega-analysis of associations between seed-based subcortico-cortical connectivity and scores on the Attention Problems scale after removing associations with in-scanner motion. **(A)** Caudate. **(B)** Putamen. **(C)** Nucleus Accumbens. **(D)** Amygdala. Voxels in significant clusters are opaque and boxed. Subthreshold voxels are presented translucently.

**TABLE S3. Significant associations between Attention Problems scores and subcortico-cortical connectivity after removing associations with in-scanner motion. n= 9867.**

| Cluster                  | X                              | Y   | Z  | Peak<br><i>partial-r</i> | Mean<br><i>partial-r</i> | Size<br>(voxels) | Overlap | Talairach label                 |     |   |      |      |      |        |                              |
|--------------------------|--------------------------------|-----|----|--------------------------|--------------------------|------------------|---------|---------------------------------|-----|---|------|------|------|--------|------------------------------|
| <b>Bilateral Caudate</b> |                                |     |    |                          |                          |                  |         |                                 |     |   |      |      |      |        |                              |
| 1                        | 56                             | -29 | 26 | 0.07                     | 0.05                     | 6389             | 22.40%  | Right Superior Temporal Gyrus   |     |   |      |      |      |        |                              |
|                          |                                |     |    |                          |                          |                  | 16.70%  | Right Postcentral Gyrus         |     |   |      |      |      |        |                              |
|                          |                                |     |    |                          |                          |                  | 14.30%  | Right Insula                    |     |   |      |      |      |        |                              |
|                          |                                |     |    |                          |                          |                  | 10.70%  | Right Precentral Gyrus          |     |   |      |      |      |        |                              |
|                          |                                |     |    |                          |                          |                  | 8.80%   | Right Inferior Parietal Lobule  |     |   |      |      |      |        |                              |
|                          |                                |     |    |                          |                          |                  | 3.00%   | Right Paracentral Lobule        |     |   |      |      |      |        |                              |
|                          |                                |     |    |                          |                          |                  | 2.00%   | Right Middle Temporal Gyrus     |     |   |      |      |      |        |                              |
|                          |                                |     |    |                          |                          |                  | 1.40%   | Right Transverse Temporal Gyrus |     |   |      |      |      |        |                              |
|                          |                                |     |    |                          |                          |                  | 1.40%   | Right Cingulate Gyrus           |     |   |      |      |      |        |                              |
|                          |                                |     |    |                          |                          |                  | 1.30%   | Right Medial Frontal Gyrus      |     |   |      |      |      |        |                              |
|                          |                                |     |    |                          |                          |                  | 1.10%   | Left Medial Frontal Gyrus       |     |   |      |      |      |        |                              |
|                          |                                |     |    |                          |                          |                  | 1.10%   | Left Paracentral Lobule         |     |   |      |      |      |        |                              |
|                          |                                |     |    |                          |                          |                  | 2       | -59                             | -13 | 8 | 0.07 | 0.04 | 3463 | 41.00% | Left Superior Temporal Gyrus |
|                          |                                |     |    |                          |                          |                  |         |                                 |     |   |      |      |      | 13.70% | Left Insula                  |
| 13.40%                   | Left Postcentral Gyrus         |     |    |                          |                          |                  |         |                                 |     |   |      |      |      |        |                              |
| 9.30%                    | Left Inferior Parietal Lobule  |     |    |                          |                          |                  |         |                                 |     |   |      |      |      |        |                              |
| 6.40%                    | Left Precentral Gyrus          |     |    |                          |                          |                  |         |                                 |     |   |      |      |      |        |                              |
| 6.10%                    | Left Middle Temporal Gyrus     |     |    |                          |                          |                  |         |                                 |     |   |      |      |      |        |                              |
| 3.40%                    | Left Transverse Temporal Gyrus |     |    |                          |                          |                  |         |                                 |     |   |      |      |      |        |                              |
| 0.20%                    | Left Supramarginal Gyrus       |     |    |                          |                          |                  |         |                                 |     |   |      |      |      |        |                              |



|                           |    |    |    |      |      |     |        |                            |                              |
|---------------------------|----|----|----|------|------|-----|--------|----------------------------|------------------------------|
|                           |    |    |    |      |      |     |        | 0.20%                      | Left Claustrum               |
|                           |    |    |    |      |      |     |        | 0.10%                      | Left Lentiform Nucleus       |
| <b>Bilateral Amygdala</b> |    |    |    |      |      |     |        |                            |                              |
| 1                         | 48 | 10 | 44 | 0.07 | 0.05 | 831 | 83.20% | Right Middle Frontal Gyrus |                              |
|                           |    |    |    |      |      |     |        | 8.70%                      | Right Precentral Gyrus       |
|                           |    |    |    |      |      |     |        | 3.30%                      | Right Inferior Frontal Gyrus |

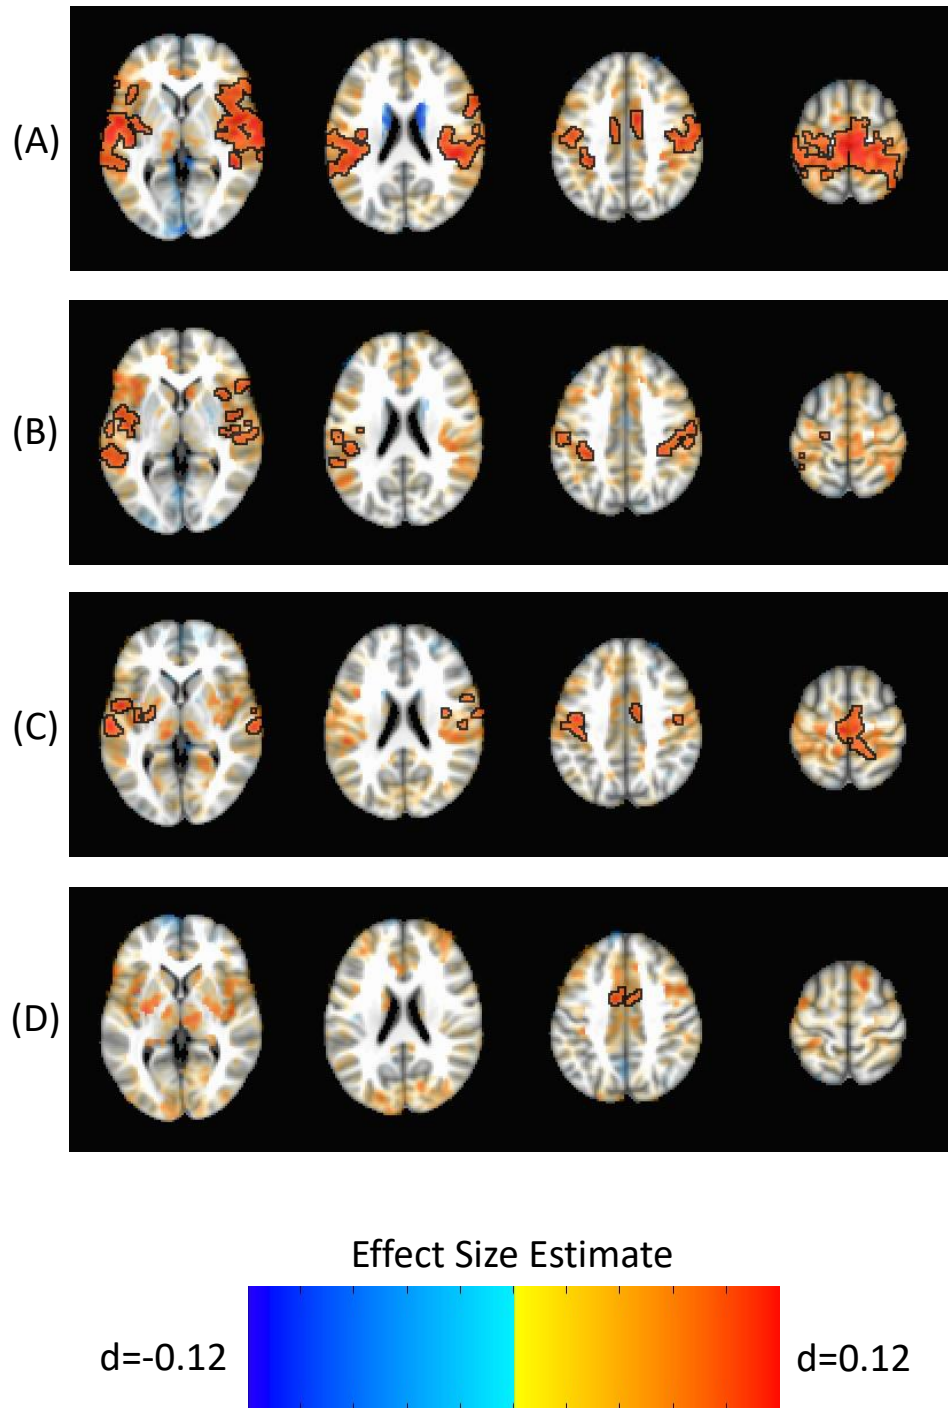

**FIGURE S17.** Findings from a mega-analysis of differences in seed-based subcortico-cortical connectivity in youth with attention deficit/hyperactivity disorder (ADHD) and unaffected control subjects after controlling for IQ. **(A)** Caudate. **(B)** Putamen. **(C)** Nucleus Accumbens. **(D)** Amygdala. Positive effect sizes indicate ADHD>controls. Voxels in significant clusters are opaque and boxed. Subthreshold voxels are presented translucently.

**TABLE S4. Show results of case-control comparison after controlling for IQ. n=1678 patients with ADHD and n=6540 unaffected controls.**

| Cluster                  | X   | Y  | Z  | Peak- <i>d</i> | Mean- <i>d</i> | Size (voxels) | Overlap | Talairach label                |
|--------------------------|-----|----|----|----------------|----------------|---------------|---------|--------------------------------|
| <b>Bilateral Caudate</b> |     |    |    |                |                |               |         |                                |
| 1                        | 64  | -7 | -3 | 0.15           | 0.10           | 12488         | 12.60%  | Right Superior Temporal Gyrus  |
|                          |     |    |    |                |                |               | 9.80%   | Right Postcentral Gyrus        |
|                          |     |    |    |                |                |               | 8.10%   | Right Insula                   |
|                          |     |    |    |                |                |               | 6.60%   | Right Precentral Gyrus         |
|                          |     |    |    |                |                |               | 5.60%   | Left Postcentral Gyrus         |
|                          |     |    |    |                |                |               | 3.80%   | Left Precentral Gyrus          |
|                          |     |    |    |                |                |               | 3.80%   | Right Medial Frontal Gyrus     |
|                          |     |    |    |                |                |               | 3.40%   | Right Inferior Parietal Lobule |
|                          |     |    |    |                |                |               | 3.40%   | Left Medial Frontal Gyrus      |
|                          |     |    |    |                |                |               | 3.20%   | Right Inferior Frontal Gyrus   |
|                          |     |    |    |                |                |               | 2.40%   | Right Paracentral Lobule       |
|                          |     |    |    |                |                |               | 2.10%   | Right Middle Temporal Gyrus    |
|                          |     |    |    |                |                |               | 2.10%   | Left Paracentral Lobule        |
|                          |     |    |    |                |                |               | 1.30%   | Left Inferior Parietal Lobule  |
|                          |     |    |    |                |                |               | 1.00%   | Right Cingulate Gyrus          |
| 2                        | -55 | -5 | -1 | 0.15           | 0.10           | 3708          | 41.70%  | Left Superior Temporal Gyrus   |
|                          |     |    |    |                |                |               | 18.20%  | Left Insula                    |
|                          |     |    |    |                |                |               | 11.00%  | Left Middle Temporal Gyrus     |
|                          |     |    |    |                |                |               | 6.00%   | Left Postcentral Gyrus         |
|                          |     |    |    |                |                |               | 4.90%   | Left Inferior Parietal Lobule  |
|                          |     |    |    |                |                |               | 3.50%   | Left Precentral Gyrus          |

|                          |     |     |     |      |      |      |        |                                |
|--------------------------|-----|-----|-----|------|------|------|--------|--------------------------------|
|                          |     |     |     |      |      |      | 3.40%  | Left Transverse Temporal Gyrus |
|                          |     |     |     |      |      |      | 1.80%  | Left Inferior Frontal Gyrus    |
|                          |     |     |     |      |      |      | 1.80%  | Left Supramarginal Gyrus       |
| <b>Bilateral Putamen</b> |     |     |     |      |      |      |        |                                |
| 1                        | -51 | -3  | -1  | 0.13 | 0.09 | 2122 | 36.20% | Left Superior Temporal Gyrus   |
|                          |     |     |     |      |      |      | 31.00% | Left Middle Temporal Gyrus     |
|                          |     |     |     |      |      |      | 11.00% | Left Insula                    |
|                          |     |     |     |      |      |      | 3.80%  | Left Inferior Parietal Lobule  |
|                          |     |     |     |      |      |      | 3.00%  | Left Postcentral Gyrus         |
|                          |     |     |     |      |      |      | 2.20%  | Left Supramarginal Gyrus       |
|                          |     |     |     |      |      |      | 1.30%  | Left Inferior Temporal Gyrus   |
|                          |     |     |     |      |      |      | 1.00%  | Left Fusiform Gyrus            |
|                          |     |     |     |      |      |      | 1.00%  | Left Precentral Gyrus          |
| 2                        | -31 | -39 | 44  | 0.12 | 0.09 | 521  | 25.00% | Left Postcentral Gyrus         |
|                          |     |     |     |      |      |      | 22.20% | Left Inferior Parietal Lobule  |
|                          |     |     |     |      |      |      | 14.80% | Left Precentral Gyrus          |
| 3                        | 52  | -29 | 36  | 0.12 | 0.09 | 484  | 52.70% | Right Postcentral Gyrus        |
|                          |     |     |     |      |      |      | 12.60% | Right Precentral Gyrus         |
|                          |     |     |     |      |      |      | 11.10% | Right Inferior Parietal Lobule |
| 4                        | 56  | -9  | -9  | 0.12 | 0.09 | 473  | 67.50% | Right Middle Temporal Gyrus    |
|                          |     |     |     |      |      |      | 15.50% | Right Superior Temporal Gyrus  |
|                          |     |     |     |      |      |      | 3.20%  | Right Inferior Temporal Gyrus  |
| 5                        | 24  | 4   | -25 | 0.12 | 0.09 | 460  | 39.20% | Right Inferior Frontal Gyrus   |
|                          |     |     |     |      |      |      | 30.80% | Right Insula                   |
|                          |     |     |     |      |      |      | 12.20% | Right Superior Temporal Gyrus  |

|                                    |     |     |    |      |      |     |        |                                 |
|------------------------------------|-----|-----|----|------|------|-----|--------|---------------------------------|
|                                    |     |     |    |      |      |     | 8.40%  | Right Uncus                     |
|                                    |     |     |    |      |      |     | 1.10%  | Right Middle Frontal Gyrus      |
| 6                                  | 44  | -25 | 8  | 0.12 | 0.09 | 413 | 63.20% | Right Superior Temporal Gyrus   |
|                                    |     |     |    |      |      |     | 16.60% | Right Transverse Temporal Gyrus |
|                                    |     |     |    |      |      |     | 9.60%  | Right Insula                    |
|                                    |     |     |    |      |      |     | 3.80%  | Right Postcentral Gyrus         |
|                                    |     |     |    |      |      |     | 2.60%  | Right Middle Temporal Gyrus     |
|                                    |     |     |    |      |      |     | 1.30%  | Right Claustrum                 |
| 7                                  | 58  | 24  | 12 | 0.11 | 0.09 | 302 | 96.10% | Right Inferior Frontal Gyrus    |
| <b>Bilateral Nucleus Accumbens</b> |     |     |    |      |      |     |        |                                 |
| 1                                  | 6   | -23 | 68 | 0.12 | 0.09 | 884 | 33.90% | Right Medial Frontal Gyrus      |
|                                    |     |     |    |      |      |     | 11.80% | Left Medial Frontal Gyrus       |
|                                    |     |     |    |      |      |     | 10.30% | Right Paracentral Lobule        |
|                                    |     |     |    |      |      |     | 7.10%  | Right Cingulate Gyrus           |
|                                    |     |     |    |      |      |     | 3.40%  | Right Postcentral Gyrus         |
|                                    |     |     |    |      |      |     | 2.40%  | Left Paracentral Lobule         |
| 2                                  | -39 | -15 | 50 | 0.13 | 0.09 | 488 | 44.30% | Left Precentral Gyrus           |
|                                    |     |     |    |      |      |     | 39.00% | Left Postcentral Gyrus          |
|                                    |     |     |    |      |      |     | 9.30%  | Left Inferior Parietal Lobule   |
| 3                                  | 70  | -21 | 14 | 0.13 | 0.09 | 477 | 29.10% | Right Postcentral Gyrus         |
|                                    |     |     |    |      |      |     | 26.90% | Right Superior Temporal Gyrus   |
|                                    |     |     |    |      |      |     | 20.40% | Right Precentral Gyrus          |
|                                    |     |     |    |      |      |     | 7.20%  | Right Middle Temporal Gyrus     |
|                                    |     |     |    |      |      |     | 2.80%  | Right Transverse Temporal Gyrus |

|                           |     |     |    |      |      |     |        |                              |
|---------------------------|-----|-----|----|------|------|-----|--------|------------------------------|
| 4                         | -63 | -19 | 2  | 0.13 | 0.09 | 326 | 73.50% | Left Superior Temporal Gyrus |
|                           |     |     |    |      |      |     | 15.40% | Left Precentral Gyrus        |
|                           |     |     |    |      |      |     | 5.80%  | Left Insula                  |
|                           |     |     |    |      |      |     | 5.00%  | Left Middle Temporal Gyrus   |
| 5                         | 34  | -5  | 12 | 0.13 | 0.09 | 294 | 44.40% | Right Insula                 |
|                           |     |     |    |      |      |     | 24.90% | Right Precentral Gyrus       |
|                           |     |     |    |      |      |     | 7.50%  | Right Inferior Frontal Gyrus |
|                           |     |     |    |      |      |     | 5.90%  | Right Claustrum              |
| 6                         | -35 | -19 | 10 | 0.12 | 0.09 | 247 | 40.10% | Left Insula                  |
|                           |     |     |    |      |      |     | 36.00% | Left Lentiform Nucleus       |
|                           |     |     |    |      |      |     | 5.30%  | Left Claustrum               |
| <b>Bilateral Amygdala</b> |     |     |    |      |      |     |        |                              |
| 1                         | -9  | -1  | 42 | 0.11 | 0.09 | 205 | 54.50% | Left Cingulate Gyrus         |
|                           |     |     |    |      |      |     | 25.70% | Right Cingulate Gyrus        |
|                           |     |     |    |      |      |     | 14.80% | Right Medial Frontal Gyrus   |
|                           |     |     |    |      |      |     | 5.00%  | Left Medial Frontal Gyrus    |

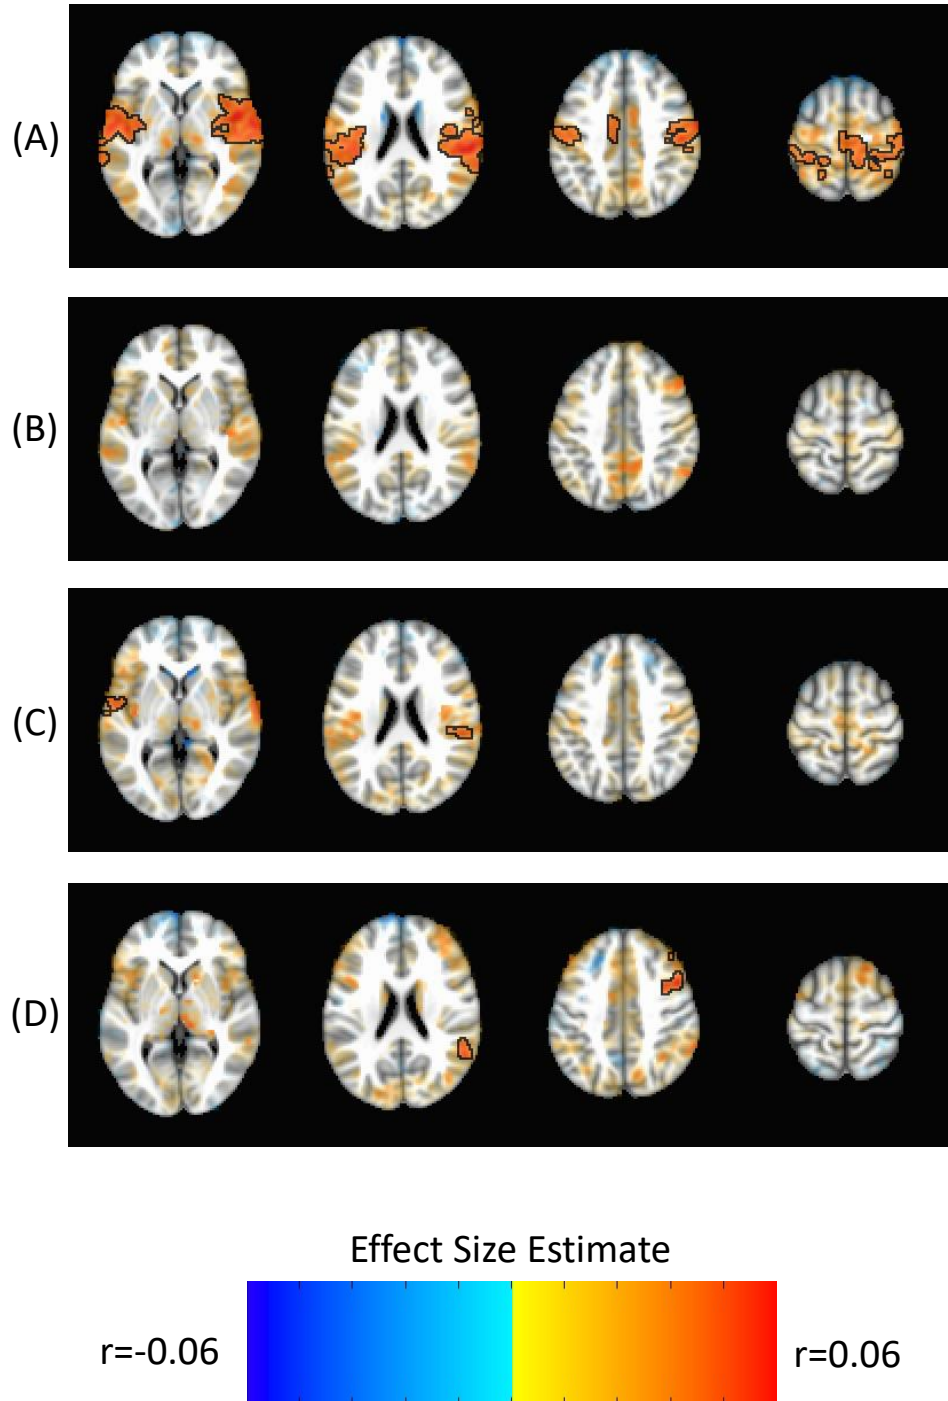

**FIGURE S18.** Findings from a mega-analysis of associations between seed-based subcortico-cortical connectivity and scores on the Attention Problems scale after controlling for IQ. **(A)** Caudate. **(B)** Putamen. **(C)** Nucleus Accumbens. **(D)** Amygdala. Voxels in significant clusters are opaque and boxed. Subthreshold voxels are presented translucently.

**TABLE S5. Significant associations between Attention Problems scores and subcortico-cortical connectivity after controlling for IQ. n=9706.**

| Cluster                            | X   | Y   | Z  | Peak<br><i>partial-r</i> | Mean<br><i>partial-r</i> | Size<br>(voxels) | Overlap | Talairach label                 |
|------------------------------------|-----|-----|----|--------------------------|--------------------------|------------------|---------|---------------------------------|
| <b>Bilateral Caudate</b>           |     |     |    |                          |                          |                  |         |                                 |
| 1                                  | 50  | -1  | -1 | 0.07                     | 0.04                     | 6802             | 21.10%  | Right Superior Temporal Gyrus   |
|                                    |     |     |    |                          |                          |                  | 17.40%  | Right Postcentral Gyrus         |
|                                    |     |     |    |                          |                          |                  | 14.50%  | Right Insula                    |
|                                    |     |     |    |                          |                          |                  | 11.50%  | Right Precentral Gyrus          |
|                                    |     |     |    |                          |                          |                  | 6.60%   | Right Inferior Parietal Lobule  |
|                                    |     |     |    |                          |                          |                  | 2.80%   | Right Paracentral Lobule        |
|                                    |     |     |    |                          |                          |                  | 2.50%   | Left Medial Frontal Gyrus       |
|                                    |     |     |    |                          |                          |                  | 1.90%   | Right Medial Frontal Gyrus      |
|                                    |     |     |    |                          |                          |                  | 1.50%   | Right Transverse Temporal Gyrus |
|                                    |     |     |    |                          |                          |                  | 1.50%   | Right Middle Temporal Gyrus     |
|                                    |     |     |    |                          |                          |                  | 1.20%   | Left Paracentral Lobule         |
|                                    |     |     |    |                          |                          |                  | 1.00%   | Left Cingulate Gyrus            |
| 2                                  | -59 | -13 | 10 | 0.07                     | 0.04                     | 4097             | 35.20%  | Left Superior Temporal Gyrus    |
|                                    |     |     |    |                          |                          |                  | 16.50%  | Left Postcentral Gyrus          |
|                                    |     |     |    |                          |                          |                  | 13.90%  | Left Insula                     |
|                                    |     |     |    |                          |                          |                  | 8.20%   | Left Precentral Gyrus           |
|                                    |     |     |    |                          |                          |                  | 6.60%   | Left Inferior Parietal Lobule   |
|                                    |     |     |    |                          |                          |                  | 4.10%   | Left Middle Temporal Gyrus      |
| <b>Bilateral Nucleus Accumbens</b> |     |     |    |                          |                          |                  |         |                                 |
| 1                                  | 68  | -23 | 16 | 0.05                     | 0.04                     | 282              | 46.90%  | Right Inferior Parietal Lobule  |



|                           |     |     |    |      |      |     |        |                                |
|---------------------------|-----|-----|----|------|------|-----|--------|--------------------------------|
|                           |     |     |    |      |      |     | 22.80% | Right Superior Temporal Gyrus  |
|                           |     |     |    |      |      |     | 11.70% | Right Postcentral Gyrus        |
|                           |     |     |    |      |      |     | 11.30% | Right Insula                   |
| 2                         | -49 | -1  | 12 | 0.05 | 0.04 | 233 | 46.40% | Left Superior Temporal Gyrus   |
|                           |     |     |    |      |      |     | 29.40% | Left Precentral Gyrus          |
|                           |     |     |    |      |      |     | 11.90% | Left Insula                    |
|                           |     |     |    |      |      |     | 7.80%  | Left Transverse Temporal Gyrus |
|                           |     |     |    |      |      |     | 1.50%  | Left Postcentral Gyrus         |
| <b>Bilateral Amygdala</b> |     |     |    |      |      |     |        |                                |
| 1                         | 48  | 10  | 44 | 0.06 | 0.04 | 391 | 85.90% | Right Middle Frontal Gyrus     |
|                           |     |     |    |      |      |     | 9.90%  | Right Precentral Gyrus         |
|                           |     |     |    |      |      |     | 2.70%  | Right Inferior Frontal Gyrus   |
| 2                         | 56  | -53 | 22 | 0.05 | 0.04 | 241 | 65.80% | Right Supramarginal Gyrus      |
|                           |     |     |    |      |      |     | 19.10% | Right Superior Temporal Gyrus  |
|                           |     |     |    |      |      |     | 15.10% | Right Inferior Parietal Lobule |

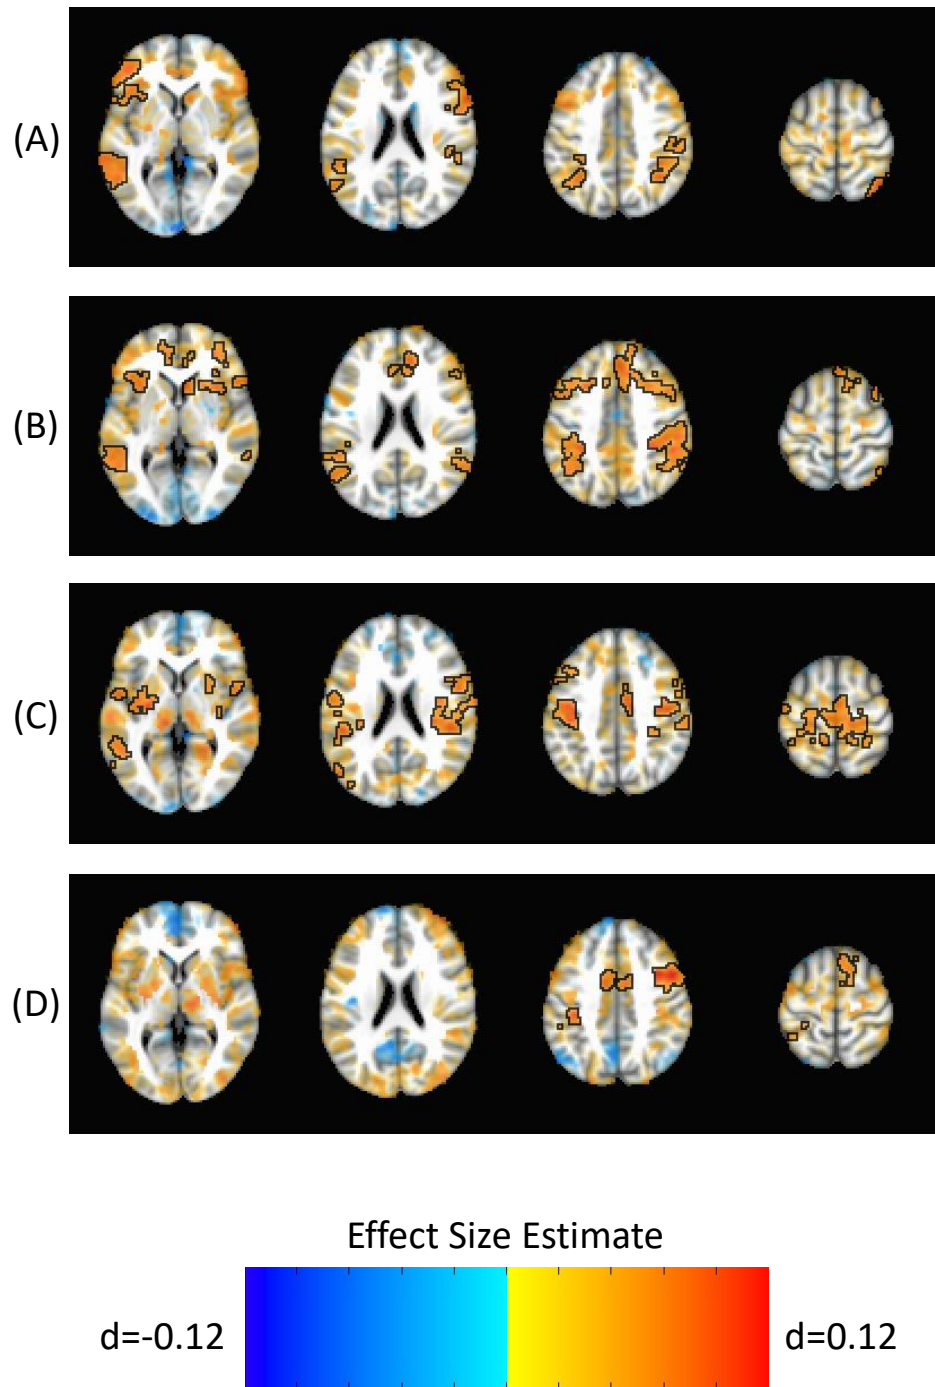

**FIGURE S19.** Findings from a mega-analysis of differences in seed-based subcortico-cortical connectivity in youth with attention deficit/hyperactivity disorder (ADHD) and unaffected control subjects after removing subjects receiving psychostimulant medication. (A) Caudate. (B) Putamen. (C) Nucleus Accumbens. (D) Amygdala. Positive effect sizes indicate ADHD>controls. Voxels in significant clusters are opaque and boxed. Subthreshold voxels are presented translucently. Findings presented at a liberal cluster forming threshold of  $p < 0.005$ .

**TABLE S6. Show results of case-control comparison. n=1114 psychostimulant-free patients with ADHD and n=6737 unaffected controls.**

| Cluster                                                                         | X   | Y   | Z  | Peak- <i>d</i> | Mean- <i>d</i> | Size (voxels) | Overlap | Talairach label                |
|---------------------------------------------------------------------------------|-----|-----|----|----------------|----------------|---------------|---------|--------------------------------|
| <b>Findings presented at a liberal cluster forming threshold of p&lt;0.005.</b> |     |     |    |                |                |               |         |                                |
| <b>Bilateral Caudate</b>                                                        |     |     |    |                |                |               |         |                                |
| 1                                                                               | -63 | -39 | -5 | 0.13           | 0.07           | 1853          | 47.20%  | Left Middle Temporal Gyrus     |
|                                                                                 |     |     |    |                |                |               | 14.10%  | Left Superior Temporal Gyrus   |
|                                                                                 |     |     |    |                |                |               | 10.20%  | Left Inferior Parietal Lobule  |
|                                                                                 |     |     |    |                |                |               | 8.40%   | Left Supramarginal Gyrus       |
|                                                                                 |     |     |    |                |                |               | 2.60%   | Left Superior Parietal Lobule  |
|                                                                                 |     |     |    |                |                |               | 1.70%   | Left Angular Gyrus             |
| 2                                                                               | 32  | -59 | 56 | 0.12           | 0.07           | 1287          | 45.60%  | Right Inferior Parietal Lobule |
|                                                                                 |     |     |    |                |                |               | 11.40%  | Right Superior Parietal Lobule |
|                                                                                 |     |     |    |                |                |               | 9.00%   | Right Postcentral Gyrus        |
|                                                                                 |     |     |    |                |                |               | 5.90%   | Right Supramarginal Gyrus      |
| 3                                                                               | -45 | 42  | 2  | 0.10           | 0.07           | 757           | 64.40%  | Left Inferior Frontal Gyrus    |
|                                                                                 |     |     |    |                |                |               | 14.10%  | Left Middle Frontal Gyrus      |
|                                                                                 |     |     |    |                |                |               | 5.40%   | Left Insula                    |
|                                                                                 |     |     |    |                |                |               | 5.10%   | Left Precentral Gyrus          |
| 4                                                                               | 38  | 4   | 26 | 0.11           | 0.07           | 659           | 58.80%  | Right Inferior Frontal Gyrus   |
|                                                                                 |     |     |    |                |                |               | 22.40%  | Right Middle Frontal Gyrus     |
|                                                                                 |     |     |    |                |                |               | 8.00%   | Right Precentral Gyrus         |

| <b>Bilateral Putamen</b> |     |    |     |      |      |      |        |                               |
|--------------------------|-----|----|-----|------|------|------|--------|-------------------------------|
| 1                        | 26  | 18 | -21 | 0.12 | 0.07 | 8098 | 15.40% | Right Inferior Frontal Gyrus  |
|                          |     |    |     |      |      |      | 11.80% | Right Middle Frontal Gyrus    |
|                          |     |    |     |      |      |      | 9.30%  | Right Superior Frontal Gyrus  |
|                          |     |    |     |      |      |      | 6.70%  | Right Medial Frontal Gyrus    |
|                          |     |    |     |      |      |      | 5.20%  | Left Medial Frontal Gyrus     |
|                          |     |    |     |      |      |      | 4.80%  | Left Inferior Frontal Gyrus   |
|                          |     |    |     |      |      |      | 4.40%  | Right Anterior Cingulate      |
|                          |     |    |     |      |      |      | 4.30%  | Right Middle Temporal Gyrus   |
|                          |     |    |     |      |      |      | 3.60%  | Left Middle Frontal Gyrus     |
|                          |     |    |     |      |      |      | 3.60%  | Left Anterior Cingulate       |
|                          |     |    |     |      |      |      | 2.50%  | Left Superior Frontal Gyrus   |
|                          |     |    |     |      |      |      | 2.10%  | Right Superior Temporal Gyrus |
|                          |     |    |     |      |      |      | 2.00%  | Right Parahippocampal Gyrus   |
|                          |     |    |     |      |      |      | 1.50%  | Right Uncus                   |
|                          |     |    |     |      |      |      | 1.00%  | Left Insula                   |
|                          |     |    |     |      |      |      | 1.00%  | Right Inferior Temporal Gyrus |
| 2                        | -45 | 4  | -37 | 0.10 | 0.07 | 3508 | 34.40% | Left Middle Temporal Gyrus    |
|                          |     |    |     |      |      |      | 18.60% | Left Superior Temporal Gyrus  |
|                          |     |    |     |      |      |      | 17.50% | Left Inferior Parietal Lobule |
|                          |     |    |     |      |      |      | 4.00%  | Left Supramarginal Gyrus      |
|                          |     |    |     |      |      |      | 2.00%  | Left Angular Gyrus            |
|                          |     |    |     |      |      |      | 1.70%  | Left Insula                   |

|                                    |     |     |    |      |      |      |        |                                |
|------------------------------------|-----|-----|----|------|------|------|--------|--------------------------------|
| 3                                  | 52  | -29 | 38 | 0.12 | 0.07 | 1852 | 29.30% | Right Inferior Parietal Lobule |
|                                    |     |     |    |      |      |      | 17.10% | Right Supramarginal Gyrus      |
|                                    |     |     |    |      |      |      | 14.00% | Right Postcentral Gyrus        |
|                                    |     |     |    |      |      |      | 11.00% | Right Superior Temporal Gyrus  |
|                                    |     |     |    |      |      |      | 7.60%  | Right Middle Temporal Gyrus    |
|                                    |     |     |    |      |      |      | 2.50%  | Right Superior Parietal Lobule |
|                                    |     |     |    |      |      |      | 1.40%  | Right Precentral Gyrus         |
| <b>Bilateral Nucleus Accumbens</b> |     |     |    |      |      |      |        |                                |
| 1                                  | -29 | -13 | 8  | 0.12 | 0.07 | 2288 | 35.30% | Left Precentral Gyrus          |
|                                    |     |     |    |      |      |      | 17.10% | Left Postcentral Gyrus         |
|                                    |     |     |    |      |      |      | 8.90%  | Left Insula                    |
|                                    |     |     |    |      |      |      | 8.70%  | Left Lentiform Nucleus         |
|                                    |     |     |    |      |      |      | 8.30%  | Left Middle Frontal Gyrus      |
|                                    |     |     |    |      |      |      | 5.10%  | Left Superior Temporal Gyrus   |
|                                    |     |     |    |      |      |      | 1.90%  | Left Claustrum                 |
|                                    |     |     |    |      |      |      | 1.20%  | Left Middle Temporal Gyrus     |
| 2                                  | 54  | -3  | 18 | 0.11 | 0.07 | 2282 | 33.90% | Right Precentral Gyrus         |
|                                    |     |     |    |      |      |      | 12.60% | Right Insula                   |
|                                    |     |     |    |      |      |      | 12.60% | Right Inferior Parietal Lobule |
|                                    |     |     |    |      |      |      | 11.50% | Right Postcentral Gyrus        |
|                                    |     |     |    |      |      |      | 9.40%  | Right Inferior Frontal Gyrus   |
|                                    |     |     |    |      |      |      | 2.90%  | Right Middle Frontal Gyrus     |

|   |     |     |    |      |      |      |        |                                |
|---|-----|-----|----|------|------|------|--------|--------------------------------|
|   |     |     |    |      |      |      | 1.90%  | Right Lentiform Nucleus        |
|   |     |     |    |      |      |      | 1.70%  | Right Superior Temporal Gyrus  |
|   |     |     |    |      |      |      | 1.60%  | Right Claustrum                |
| 3 | 24  | -21 | 68 | 0.11 | 0.07 | 1457 | 22.20% | Right Medial Frontal Gyrus     |
|   |     |     |    |      |      |      | 10.50% | Left Medial Frontal Gyrus      |
|   |     |     |    |      |      |      | 9.60%  | Right Cingulate Gyrus          |
|   |     |     |    |      |      |      | 7.90%  | Right Paracentral Lobule       |
|   |     |     |    |      |      |      | 6.90%  | Right Postcentral Gyrus        |
|   |     |     |    |      |      |      | 6.80%  | Right Precentral Gyrus         |
|   |     |     |    |      |      |      | 1.50%  | Left Paracentral Lobule        |
|   |     |     |    |      |      |      | 1.10%  | Right Superior Parietal Lobule |
| 4 | -51 | -47 | -3 | 0.10 | 0.07 | 1121 | 63.50% | Left Middle Temporal Gyrus     |
|   |     |     |    |      |      |      | 12.40% | Left Inferior Parietal Lobule  |
|   |     |     |    |      |      |      | 9.10%  | Left Superior Temporal Gyrus   |
|   |     |     |    |      |      |      | 3.80%  | Left Middle Occipital Gyrus    |
|   |     |     |    |      |      |      | 2.70%  | Left Insula                    |
|   |     |     |    |      |      |      | 1.80%  | Left Inferior Temporal Gyrus   |
| 5 | -19 | -43 | 72 | 0.09 | 0.07 | 833  | 24.30% | Left Postcentral Gyrus         |
|   |     |     |    |      |      |      | 12.50% | Left Precentral Gyrus          |
|   |     |     |    |      |      |      | 10.40% | Left Inferior Parietal Lobule  |
|   |     |     |    |      |      |      | 2.80%  | Left Paracentral Lobule        |
|   |     |     |    |      |      |      | 1.50%  | Left Superior Parietal Lobule  |

| <b>Bilateral Amygdala</b> |     |     |    |      |      |      |        |                               |
|---------------------------|-----|-----|----|------|------|------|--------|-------------------------------|
| 1                         | 36  | 8   | 40 | 0.13 | 0.08 | 1061 | 61.70% | Right Middle Frontal Gyrus    |
|                           |     |     |    |      |      |      | 25.00% | Right Precentral Gyrus        |
|                           |     |     |    |      |      |      | 7.10%  | Right Inferior Frontal Gyrus  |
|                           |     |     |    |      |      |      | 1.10%  | Right Superior Frontal Gyrus  |
| 2                         | 8   | 18  | 54 | 0.10 | 0.07 | 847  | 39.40% | Right Superior Frontal Gyrus  |
|                           |     |     |    |      |      |      | 16.70% | Left Cingulate Gyrus          |
|                           |     |     |    |      |      |      | 16.50% | Right Medial Frontal Gyrus    |
|                           |     |     |    |      |      |      | 15.20% | Right Cingulate Gyrus         |
|                           |     |     |    |      |      |      | 3.70%  | Left Medial Frontal Gyrus     |
| 3                         | -37 | -29 | 42 | 0.11 | 0.07 | 620  | 38.00% | Left Inferior Parietal Lobule |
|                           |     |     |    |      |      |      | 33.80% | Left Postcentral Gyrus        |
|                           |     |     |    |      |      |      | 2.50%  | Left Supramarginal Gyrus      |

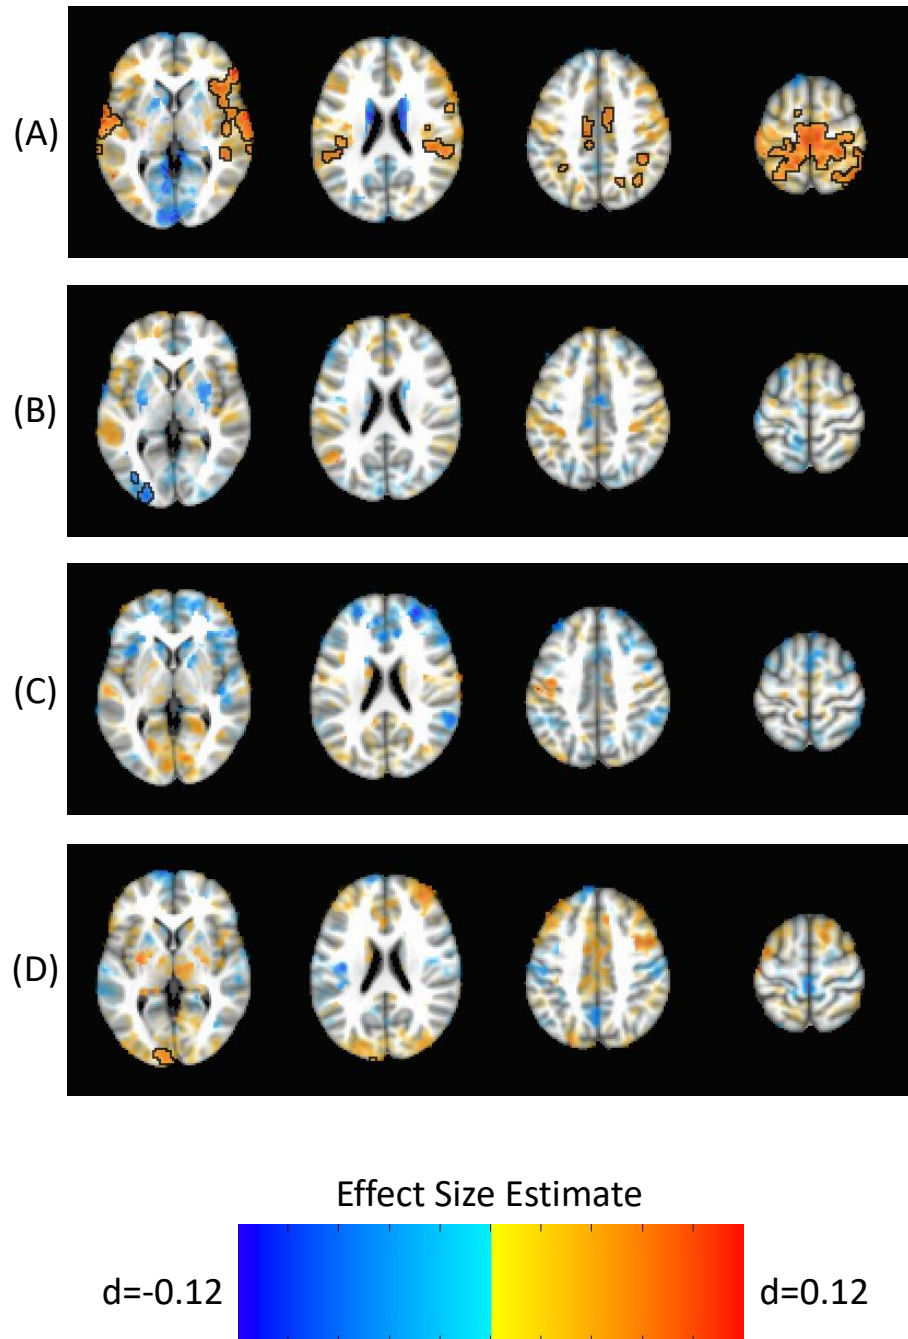

**FIGURE S20.** Findings from a mega-analysis of differences in seed-based subcortico-cortical connectivity in youth with attention deficit/hyperactivity disorder (ADHD) and unaffected control subjects after applying partial correlation models at the single subject level. **(A)** Caudate. **(B)** Putamen. **(C)** Nucleus Accumbens. **(D)** Amygdala. Positive effect sizes indicate ADHD>controls. Voxels in significant clusters are opaque and boxed. Subthreshold voxels are presented translucently. Findings presented at a liberal cluster forming threshold of  $p < 0.005$ .



**TABLE S7. Show results of case-control comparison after applying partial correlation models at the single subject level. n=1696 patients with ADHD and n=6737 unaffected controls.**

| Cluster                                                                           | X   | Y   | Z  | Peak- <i>d</i> | Mean- <i>d</i> | Size (voxels) | Overlap | Talairach label                |
|-----------------------------------------------------------------------------------|-----|-----|----|----------------|----------------|---------------|---------|--------------------------------|
| <b>Findings presented at the strict cluster forming threshold of p&lt;0.0001.</b> |     |     |    |                |                |               |         |                                |
| <b>Bilateral Caudate</b>                                                          |     |     |    |                |                |               |         |                                |
| 1                                                                                 | 14  | -7  | 78 | 0.38           | 0.09           | 761           | 19.40%  | Right Medial Frontal Gyrus     |
|                                                                                   |     |     |    |                |                |               | 12.40%  | Left Medial Frontal Gyrus      |
|                                                                                   |     |     |    |                |                |               | 9.10%   | Right Paracentral Lobule       |
|                                                                                   |     |     |    |                |                |               | 7.80%   | Right Postcentral Gyrus        |
|                                                                                   |     |     |    |                |                |               | 5.90%   | Left Paracentral Lobule        |
| 2                                                                                 | -19 | -33 | 78 | 0.14           | 0.09           | 250           | 14.50%  | Left Postcentral Gyrus         |
|                                                                                   |     |     |    |                |                |               | 7.70%   | Left Precentral Gyrus          |
| 3                                                                                 | 14  | -5  | 22 | -0.19          | -0.10          | 175           | 52.80%  | Right Caudate                  |
| 4                                                                                 | -9  | 4   | 16 | -0.15          | -0.10          | 165           | 49.30%  | Left Caudate                   |
|                                                                                   |     |     |    |                |                |               | 16.10%  | Left Lentiform Nucleus         |
| 5                                                                                 | 62  | -37 | 8  | 0.11           | 0.09           | 125           | 86.30%  | Right Superior Temporal Gyrus  |
|                                                                                   |     |     |    |                |                |               | 3.40%   | Right Middle Temporal Gyrus    |
| 6                                                                                 | 42  | -45 | 54 | 0.24           | 0.09           | 99            | 39.60%  | Right Inferior Parietal Lobule |
| <b>Findings presented at a liberal cluster forming threshold of p&lt;0.005.</b>   |     |     |    |                |                |               |         |                                |
| <b>Bilateral Caudate</b>                                                          |     |     |    |                |                |               |         |                                |
| 1                                                                                 | 14  | -7  | 78 | 0.38           | 0.07           | 6672          | 5.30%   | Left Postcentral Gyrus         |
|                                                                                   |     |     |    |                |                |               | 5.30%   | Right Medial Frontal Gyrus     |
|                                                                                   |     |     |    |                |                |               | 5.30%   | Right Inferior Parietal Lobule |
|                                                                                   |     |     |    |                |                |               | 5.00%   | Left Medial Frontal Gyrus      |
|                                                                                   |     |     |    |                |                |               | 4.90%   | Left Paracentral Lobule        |
|                                                                                   |     |     |    |                |                |               | 4.70%   | Right Postcentral Gyrus        |

|                          |     |     |    |       |       |      |        |                                 |
|--------------------------|-----|-----|----|-------|-------|------|--------|---------------------------------|
|                          |     |     |    |       |       |      | 4.10%  | Right Paracentral Lobule        |
|                          |     |     |    |       |       |      | 4.00%  | Right Superior Parietal Lobule  |
|                          |     |     |    |       |       |      | 3.00%  | Right Precentral Gyrus          |
|                          |     |     |    |       |       |      | 2.30%  | Left Superior Parietal Lobule   |
|                          |     |     |    |       |       |      | 1.80%  | Left Precentral Gyrus           |
|                          |     |     |    |       |       |      | 1.60%  | Right Cingulate Gyrus           |
|                          |     |     |    |       |       |      | 1.10%  | Right Precuneus                 |
|                          |     |     |    |       |       |      | 1.10%  | Left Inferior Parietal Lobule   |
| 2                        | 66  | -3  | -3 | 0.26  | 0.07  | 2136 | 45.10% | Right Superior Temporal Gyrus   |
|                          |     |     |    |       |       |      | 11.90% | Right Insula                    |
|                          |     |     |    |       |       |      | 10.70% | Right Inferior Frontal Gyrus    |
|                          |     |     |    |       |       |      | 7.20%  | Right Inferior Parietal Lobule  |
|                          |     |     |    |       |       |      | 6.20%  | Right Precentral Gyrus          |
|                          |     |     |    |       |       |      | 5.00%  | Right Middle Temporal Gyrus     |
|                          |     |     |    |       |       |      | 2.70%  | Right Transverse Temporal Gyrus |
|                          |     |     |    |       |       |      | 1.20%  | Right Postcentral Gyrus         |
| 3                        | -71 | -21 | 6  | 0.21  | 0.07  | 763  | 60.70% | Left Superior Temporal Gyrus    |
|                          |     |     |    |       |       |      | 6.70%  | Left Insula                     |
|                          |     |     |    |       |       |      | 6.30%  | Left Transverse Temporal Gyrus  |
|                          |     |     |    |       |       |      | 5.60%  | Left Inferior Parietal Lobule   |
|                          |     |     |    |       |       |      | 5.20%  | Left Postcentral Gyrus          |
|                          |     |     |    |       |       |      | 2.60%  | Left Middle Temporal Gyrus      |
| <b>Bilateral Putamen</b> |     |     |    |       |       |      |        |                                 |
| 1                        | -27 | -95 | -3 | -0.11 | -0.07 | 369  | 37.50% | Left Inferior Occipital Gyrus   |
|                          |     |     |    |       |       |      | 12.70% | Left Cuneus                     |

|                           |     |     |    |      |      |     |        |                               |
|---------------------------|-----|-----|----|------|------|-----|--------|-------------------------------|
|                           |     |     |    |      |      |     | 10.50% | Left Lingual Gyrus            |
|                           |     |     |    |      |      |     | 10.10% | Left Middle Occipital Gyrus   |
|                           |     |     |    |      |      |     | 4.50%  | Left Fusiform Gyrus           |
| <b>Bilateral Amygdala</b> |     |     |    |      |      |     |        |                               |
| 1                         | -25 | -87 | 10 | 0.08 | 0.06 | 452 | 42.90% | Left Cuneus                   |
|                           |     |     |    |      |      |     | 24.20% | Left Lingual Gyrus            |
|                           |     |     |    |      |      |     | 21.80% | Left Middle Occipital Gyrus   |
|                           |     |     |    |      |      |     | 1.00%  | Left Inferior Occipital Gyrus |

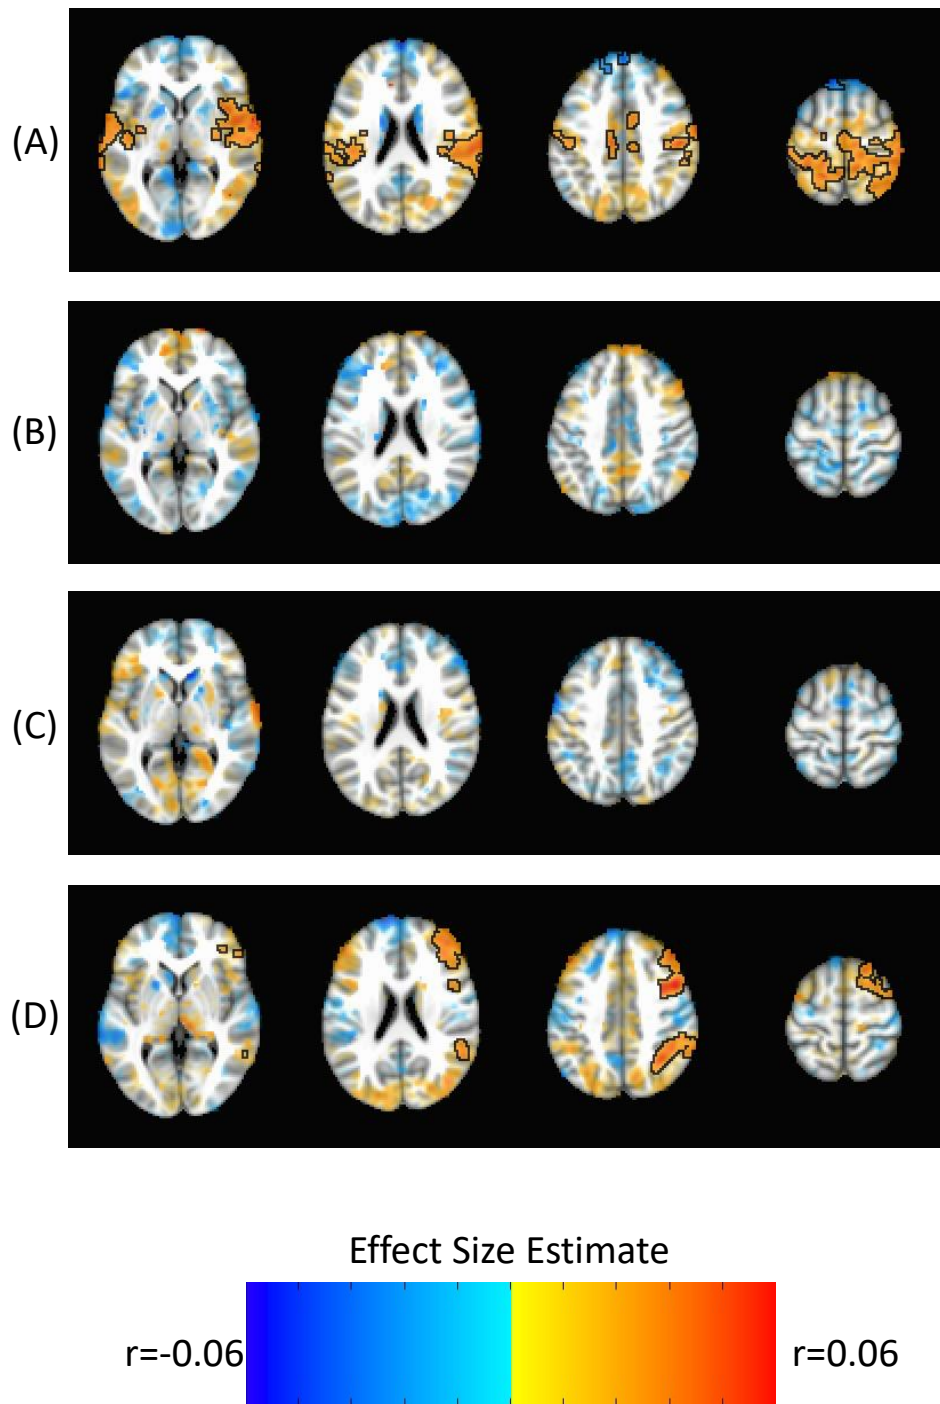

**FIGURE S21.** Findings from a mega-analysis of associations between seed-based subcortico-cortical connectivity and scores on the Attention Problems scale after applying partial correlation models at the single subject level. **(A)** Caudate. **(B)** Putamen. **(C)** Nucleus Accumbens. **(D)** Amygdala. Voxels in significant clusters are opaque and boxed. Subthreshold voxels are presented translucently.

**TABLE S8. Significant associations between Attention Problems scores and subcortico-cortical connectivity after applying partial correlation models at the single subject level. n= 9890.**

| Cluster                                                                           | X   | Y   | Z  | Peak<br><i>partial-r</i> | Mean<br><i>partial-r</i> | Size<br>(voxels) | Overlap | Talairach label                 |
|-----------------------------------------------------------------------------------|-----|-----|----|--------------------------|--------------------------|------------------|---------|---------------------------------|
| <b>Findings presented at the strict cluster forming threshold of p&lt;0.0001.</b> |     |     |    |                          |                          |                  |         |                                 |
| <b>Bilateral Caudate</b>                                                          |     |     |    |                          |                          |                  |         |                                 |
| 1                                                                                 | 70  | -13 | 8  | 0.08                     | 0.04                     | 692              | 52.40%  | Right Superior Temporal Gyrus   |
|                                                                                   |     |     |    |                          |                          |                  | 22.00%  | Right Inferior Parietal Lobule  |
|                                                                                   |     |     |    |                          |                          |                  | 7.50%   | Right Postcentral Gyrus         |
|                                                                                   |     |     |    |                          |                          |                  | 5.30%   | Right Transverse Temporal Gyrus |
|                                                                                   |     |     |    |                          |                          |                  | 4.00%   | Right Precentral Gyrus          |
|                                                                                   |     |     |    |                          |                          |                  | 2.50%   | Right Insula                    |
|                                                                                   |     |     |    |                          |                          |                  | 2.20%   | Right Middle Temporal Gyrus     |
| 2                                                                                 | -63 | -11 | 12 | 0.05                     | 0.04                     | 200              | 56.90%  | Left Superior Temporal Gyrus    |
|                                                                                   |     |     |    |                          |                          |                  | 21.10%  | Left Transverse Temporal Gyrus  |
|                                                                                   |     |     |    |                          |                          |                  | 19.20%  | Left Postcentral Gyrus          |
|                                                                                   |     |     |    |                          |                          |                  | 1.60%   | Left Precentral Gyrus           |
| 3                                                                                 | 50  | -25 | 50 | 0.12                     | 0.05                     | 158              | 81.30%  | Right Postcentral Gyrus         |
|                                                                                   |     |     |    |                          |                          |                  | 3.10%   | Right Precentral Gyrus          |
| 4                                                                                 | 24  | -45 | 76 | 0.08                     | 0.04                     | 122              | 12.30%  | Right Postcentral Gyrus         |
| <b>Findings presented at a liberal cluster forming threshold of p&lt;0.005.</b>   |     |     |    |                          |                          |                  |         |                                 |
| <b>Bilateral Caudate</b>                                                          |     |     |    |                          |                          |                  |         |                                 |
| 1                                                                                 | -29 | -41 | 74 | 0.18                     | 0.03                     | 5801             | 13.10%  | Right Postcentral Gyrus         |
|                                                                                   |     |     |    |                          |                          |                  | 9.30%   | Left Postcentral Gyrus          |
|                                                                                   |     |     |    |                          |                          |                  | 5.00%   | Right Paracentral Lobule        |

|   |     |     |   |      |      |      |        |                                 |
|---|-----|-----|---|------|------|------|--------|---------------------------------|
|   |     |     |   |      |      |      | 4.70%  | Right Precentral Gyrus          |
|   |     |     |   |      |      |      | 3.80%  | Left Paracentral Lobule         |
|   |     |     |   |      |      |      | 3.30%  | Right Medial Frontal Gyrus      |
|   |     |     |   |      |      |      | 3.30%  | Left Medial Frontal Gyrus       |
|   |     |     |   |      |      |      | 3.30%  | Right Superior Parietal Lobule  |
|   |     |     |   |      |      |      | 3.10%  | Left Precentral Gyrus           |
|   |     |     |   |      |      |      | 2.20%  | Right Cingulate Gyrus           |
|   |     |     |   |      |      |      | 2.10%  | Right Inferior Parietal Lobule  |
|   |     |     |   |      |      |      | 2.10%  | Left Precuneus                  |
|   |     |     |   |      |      |      | 1.40%  | Right Precuneus                 |
|   |     |     |   |      |      |      | 1.40%  | Left Superior Parietal Lobule   |
| 2 | 70  | -13 | 8 | 0.08 | 0.03 | 3544 | 35.80% | Right Superior Temporal Gyrus   |
|   |     |     |   |      |      |      | 18.90% | Right Insula                    |
|   |     |     |   |      |      |      | 11.50% | Right Inferior Parietal Lobule  |
|   |     |     |   |      |      |      | 9.90%  | Right Postcentral Gyrus         |
|   |     |     |   |      |      |      | 6.80%  | Right Precentral Gyrus          |
|   |     |     |   |      |      |      | 3.10%  | Right Transverse Temporal Gyrus |
|   |     |     |   |      |      |      | 2.10%  | Right Middle Temporal Gyrus     |
| 3 | -69 | -27 | 8 | 0.06 | 0.03 | 2111 | 50.80% | Left Superior Temporal Gyrus    |
|   |     |     |   |      |      |      | 14.10% | Left Insula                     |
|   |     |     |   |      |      |      | 11.50% | Left Postcentral Gyrus          |
|   |     |     |   |      |      |      | 5.80%  | Left Inferior Parietal Lobule   |
|   |     |     |   |      |      |      | 5.30%  | Left Transverse Temporal Gyrus  |
|   |     |     |   |      |      |      | 3.10%  | Left Middle Temporal Gyrus      |
|   |     |     |   |      |      |      | 1.70%  | Left Precentral Gyrus           |

|                                    |    |     |     |       |       |      |        |                                |
|------------------------------------|----|-----|-----|-------|-------|------|--------|--------------------------------|
| 4                                  | 4  | 18  | 54  | -0.05 | -0.03 | 777  | 24.90% | Right Superior Frontal Gyrus   |
|                                    |    |     |     |       |       |      | 12.80% | Left Superior Frontal Gyrus    |
|                                    |    |     |     |       |       |      | 1.00%  | Right Medial Frontal Gyrus     |
| <b>Bilateral Nucleus Accumbens</b> |    |     |     |       |       |      |        |                                |
| 1                                  | -3 | 34  | -15 | 0.04  | 0.03  | 322  | 44.20% | Left Medial Frontal Gyrus      |
|                                    |    |     |     |       |       |      | 19.30% | Right Medial Frontal Gyrus     |
|                                    |    |     |     |       |       |      | 8.40%  | Left Subcallosal Gyrus         |
|                                    |    |     |     |       |       |      | 7.20%  | Left Anterior Cingulate        |
|                                    |    |     |     |       |       |      | 4.00%  | Left Rectal Gyrus              |
|                                    |    |     |     |       |       |      | 2.00%  | Right Anterior Cingulate       |
|                                    |    |     |     |       |       |      | 1.90%  | Left Orbital Gyrus             |
| <b>Bilateral Amygdala</b>          |    |     |     |       |       |      |        |                                |
| 1                                  | 48 | 10  | 44  | 0.07  | 0.03  | 3170 | 56.10% | Right Middle Frontal Gyrus     |
|                                    |    |     |     |       |       |      | 13.20% | Right Superior Frontal Gyrus   |
|                                    |    |     |     |       |       |      | 11.20% | Right Inferior Frontal Gyrus   |
|                                    |    |     |     |       |       |      | 4.30%  | Right Precentral Gyrus         |
|                                    |    |     |     |       |       |      | 2.50%  | Right Medial Frontal Gyrus     |
| 2                                  | 34 | -57 | 44  | 0.05  | 0.03  | 1251 | 42.50% | Right Inferior Parietal Lobule |
|                                    |    |     |     |       |       |      | 20.00% | Right Supramarginal Gyrus      |
|                                    |    |     |     |       |       |      | 11.40% | Right Superior Temporal Gyrus  |
|                                    |    |     |     |       |       |      | 5.90%  | Right Middle Temporal Gyrus    |
|                                    |    |     |     |       |       |      | 3.50%  | Right Superior Parietal Lobule |
|                                    |    |     |     |       |       |      | 2.50%  | Right Precuneus                |
|                                    |    |     |     |       |       |      | 1.10%  | Right Angular Gyrus            |

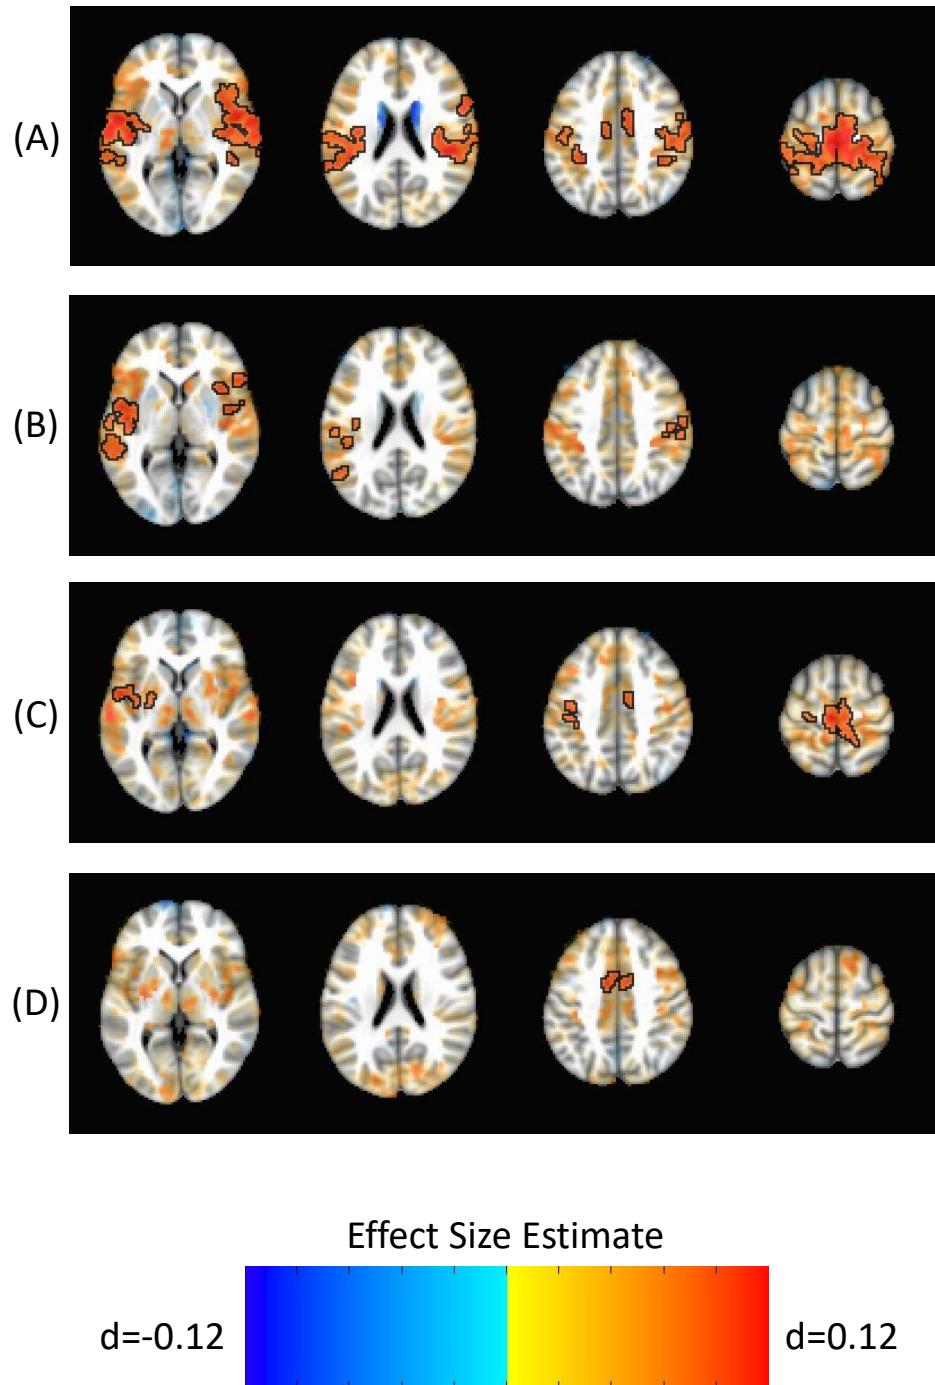

**FIGURE S22.** Findings from a mega-analysis of differences in seed-based subcortico-cortical connectivity in youth with attention deficit/hyperactivity disorder (ADHD) and unaffected control subjects using left hemisphere subcortical seeds. **(A)** Caudate. **(B)** Putamen. **(C)** Nucleus Accumbens. **(D)** Amygdala. Positive effect sizes indicate ADHD>controls. Voxels in significant clusters are opaque and boxed. Subthreshold voxels are presented translucently.



**TABLE S9. Show results of case-control comparison using left hemisphere subcortical seeds. n=1696 patients with ADHD and n=6737 unaffected controls.**

| Cluster             | X                               | Y   | Z  | Peak- <i>d</i> | Mean- <i>d</i> | Size (voxels) | Overlap | Talairach label                |
|---------------------|---------------------------------|-----|----|----------------|----------------|---------------|---------|--------------------------------|
| <b>Left Caudate</b> |                                 |     |    |                |                |               |         |                                |
| 1                   | -5                              | -27 | 62 | 0.15           | 0.10           | 5584          | 8.60%   | Right Medial Frontal Gyrus     |
|                     |                                 |     |    |                |                |               | 7.70%   | Right Postcentral Gyrus        |
|                     |                                 |     |    |                |                |               | 7.40%   | Left Postcentral Gyrus         |
|                     |                                 |     |    |                |                |               | 6.90%   | Left Medial Frontal Gyrus      |
|                     |                                 |     |    |                |                |               | 5.30%   | Left Paracentral Lobule        |
|                     |                                 |     |    |                |                |               | 5.30%   | Right Paracentral Lobule       |
|                     |                                 |     |    |                |                |               | 4.90%   | Left Precentral Gyrus          |
|                     |                                 |     |    |                |                |               | 3.00%   | Left Inferior Parietal Lobule  |
|                     |                                 |     |    |                |                |               | 2.80%   | Right Precentral Gyrus         |
|                     |                                 |     |    |                |                |               | 1.90%   | Right Inferior Parietal Lobule |
|                     |                                 |     |    |                |                |               | 1.70%   | Right Cingulate Gyrus          |
|                     |                                 |     |    |                |                |               | 1.00%   | Right Superior Frontal Gyrus   |
|                     |                                 |     |    |                |                |               | 2       | 64                             |
| 18.40%              | Right Insula                    |     |    |                |                |               |         |                                |
| 14.40%              | Right Postcentral Gyrus         |     |    |                |                |               |         |                                |
| 9.80%               | Right Precentral Gyrus          |     |    |                |                |               |         |                                |
| 8.30%               | Right Inferior Parietal Lobule  |     |    |                |                |               |         |                                |
| 5.00%               | Right Inferior Frontal Gyrus    |     |    |                |                |               |         |                                |
| 3.20%               | Right Middle Temporal Gyrus     |     |    |                |                |               |         |                                |
| 2.40%               | Right Transverse Temporal Gyrus |     |    |                |                |               |         |                                |
| 3                   | -55                             | -5  | -1 | 0.16           | 0.10           | 3668          | 39.90%  | Left Superior Temporal Gyrus   |

|                     |     |     |     |      |      |      |        |                                |
|---------------------|-----|-----|-----|------|------|------|--------|--------------------------------|
|                     |     |     |     |      |      |      | 19.40% | Left Insula                    |
|                     |     |     |     |      |      |      | 10.30% | Left Postcentral Gyrus         |
|                     |     |     |     |      |      |      | 8.20%  | Left Middle Temporal Gyrus     |
|                     |     |     |     |      |      |      | 6.20%  | Left Precentral Gyrus          |
|                     |     |     |     |      |      |      | 4.30%  | Left Inferior Parietal Lobule  |
|                     |     |     |     |      |      |      | 2.10%  | Left Transverse Temporal Gyrus |
| <b>Left Putamen</b> |     |     |     |      |      |      |        |                                |
| 1                   | -51 | -3  | -1  | 0.14 | 0.09 | 2299 | 38.40% | Left Superior Temporal Gyrus   |
|                     |     |     |     |      |      |      | 30.70% | Left Middle Temporal Gyrus     |
|                     |     |     |     |      |      |      | 13.70% | Left Insula                    |
|                     |     |     |     |      |      |      | 1.60%  | Left Inferior Temporal Gyrus   |
|                     |     |     |     |      |      |      | 1.50%  | Left Postcentral Gyrus         |
|                     |     |     |     |      |      |      | 1.30%  | Left Precentral Gyrus          |
|                     |     |     |     |      |      |      | 1.00%  | Left Fusiform Gyrus            |
| 2                   | 36  | 16  | 4   | 0.11 | 0.09 | 783  | 60.40% | Right Inferior Frontal Gyrus   |
|                     |     |     |     |      |      |      | 21.90% | Right Insula                   |
|                     |     |     |     |      |      |      | 6.20%  | Right Superior Temporal Gyrus  |
|                     |     |     |     |      |      |      | 4.10%  | Right Uncus                    |
| 3                   | 52  | 6   | -25 | 0.11 | 0.09 | 355  | 68.90% | Right Middle Temporal Gyrus    |
|                     |     |     |     |      |      |      | 17.90% | Right Superior Temporal Gyrus  |
|                     |     |     |     |      |      |      | 1.90%  | Right Inferior Temporal Gyrus  |
| 4                   | 52  | -29 | 36  | 0.12 | 0.09 | 313  | 65.60% | Right Postcentral Gyrus        |
|                     |     |     |     |      |      |      | 24.90% | Right Precentral Gyrus         |
|                     |     |     |     |      |      |      | 8.50%  | Right Inferior Parietal Lobule |

| <b>Left Nucleus Accumbens</b> |     |     |    |      |      |     |        |                               |
|-------------------------------|-----|-----|----|------|------|-----|--------|-------------------------------|
| 1                             | -5  | -25 | 62 | 0.13 | 0.09 | 974 | 27.10% | Right Medial Frontal Gyrus    |
|                               |     |     |    |      |      |     | 15.40% | Left Medial Frontal Gyrus     |
|                               |     |     |    |      |      |     | 9.90%  | Right Paracentral Lobule      |
|                               |     |     |    |      |      |     | 8.20%  | Left Precentral Gyrus         |
|                               |     |     |    |      |      |     | 5.40%  | Right Cingulate Gyrus         |
|                               |     |     |    |      |      |     | 4.30%  | Left Paracentral Lobule       |
|                               |     |     |    |      |      |     | 3.70%  | Right Postcentral Gyrus       |
|                               |     |     |    |      |      |     | 1.30%  | Left Postcentral Gyrus        |
| 2                             | -29 | -11 | 8  | 0.12 | 0.09 | 528 | 29.40% | Left Insula                   |
|                               |     |     |    |      |      |     | 24.30% | Left Superior Temporal Gyrus  |
|                               |     |     |    |      |      |     | 20.00% | Left Lentiform Nucleus        |
|                               |     |     |    |      |      |     | 6.90%  | Left Precentral Gyrus         |
|                               |     |     |    |      |      |     | 5.30%  | Left Middle Temporal Gyrus    |
|                               |     |     |    |      |      |     | 2.30%  | Left Claustrum                |
| 3                             | -39 | -13 | 50 | 0.15 | 0.09 | 324 | 55.70% | Left Precentral Gyrus         |
|                               |     |     |    |      |      |     | 19.00% | Left Postcentral Gyrus        |
|                               |     |     |    |      |      |     | 13.00% | Left Inferior Parietal Lobule |
| <b>Left Amygdala</b>          |     |     |    |      |      |     |        |                               |
| 1                             | -9  | -1  | 44 | 0.11 | 0.09 | 245 | 49.00% | Left Cingulate Gyrus          |
|                               |     |     |    |      |      |     | 31.60% | Right Cingulate Gyrus         |
|                               |     |     |    |      |      |     | 9.60%  | Right Medial Frontal Gyrus    |
|                               |     |     |    |      |      |     | 9.50%  | Left Medial Frontal Gyrus     |

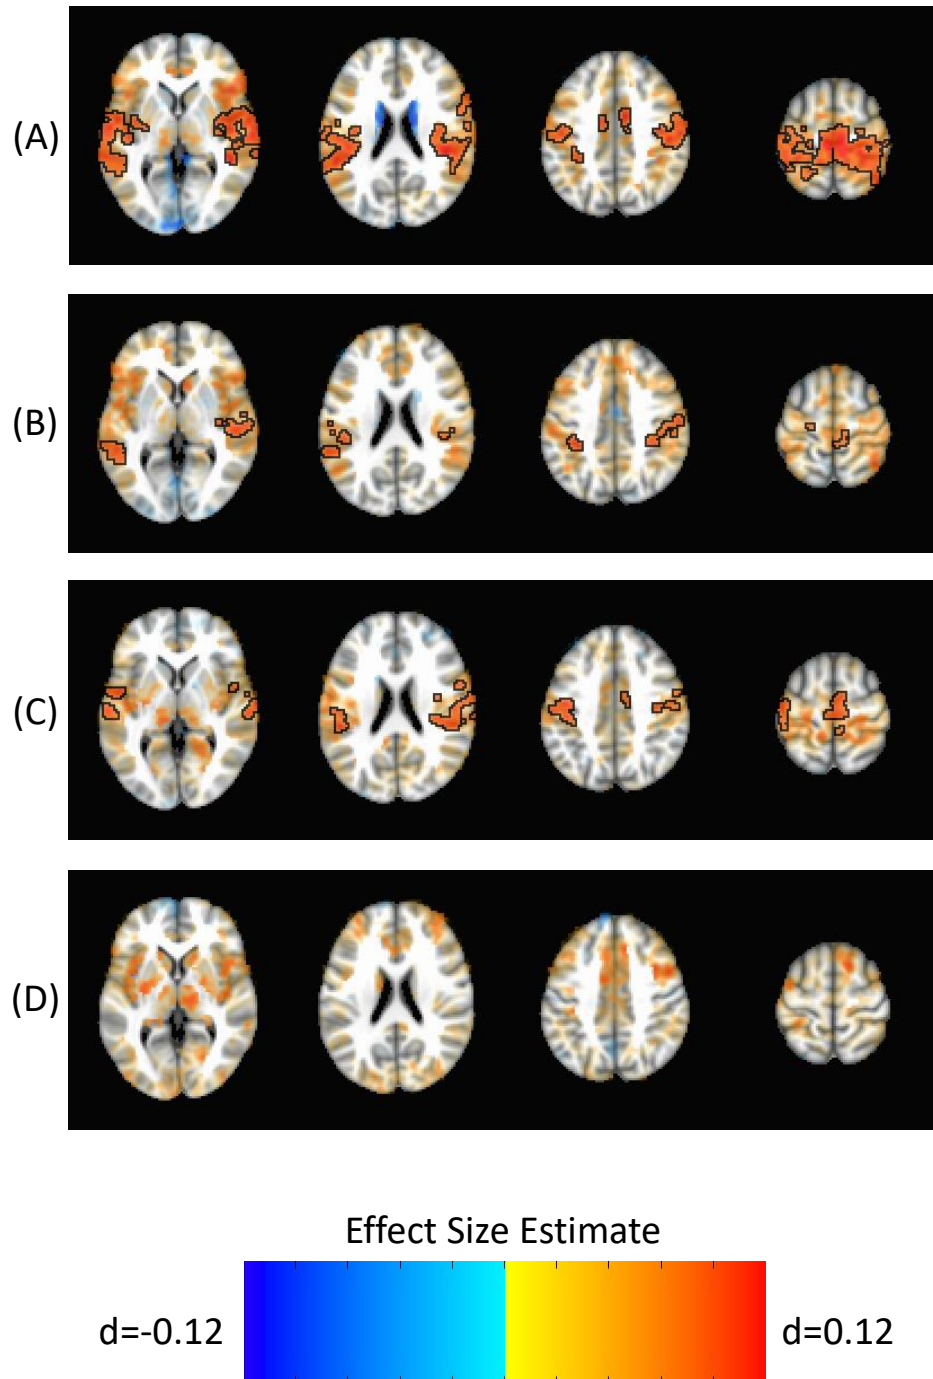

**FIGURE S23.** Findings from a mega-analysis of differences in seed-based subcortico-cortical connectivity in youth with attention deficit/hyperactivity disorder (ADHD) and unaffected control subjects using right hemisphere subcortical seeds. **(A)** Caudate. **(B)** Putamen. **(C)** Nucleus Accumbens. **(D)** Amygdala. Positive effect sizes indicate ADHD>controls. Voxels in significant clusters are opaque and boxed. Subthreshold voxels are presented translucently.

**TABLE S10. Show results of case-control comparison using right hemisphere subcortical seeds. n=1696 patients with ADHD and n=6737 unaffected controls.**

| Cluster              | X   | Y   | Z  | Peak- <i>d</i> | Mean- <i>d</i> | Size (voxels) | Overlap | Talairach label                |
|----------------------|-----|-----|----|----------------|----------------|---------------|---------|--------------------------------|
| <b>Right Caudate</b> |     |     |    |                |                |               |         |                                |
| 1                    | 64  | -7  | -3 | 0.14           | 0.09           | 11438         | 13.40%  | Right Superior Temporal Gyrus  |
|                      |     |     |    |                |                |               | 10.00%  | Right Postcentral Gyrus        |
|                      |     |     |    |                |                |               | 7.80%   | Right Precentral Gyrus         |
|                      |     |     |    |                |                |               | 5.80%   | Right Insula                   |
|                      |     |     |    |                |                |               | 5.50%   | Left Postcentral Gyrus         |
|                      |     |     |    |                |                |               | 4.40%   | Left Precentral Gyrus          |
|                      |     |     |    |                |                |               | 3.70%   | Right Inferior Parietal Lobule |
|                      |     |     |    |                |                |               | 3.60%   | Right Medial Frontal Gyrus     |
|                      |     |     |    |                |                |               | 3.40%   | Left Medial Frontal Gyrus      |
|                      |     |     |    |                |                |               | 2.90%   | Right Middle Temporal Gyrus    |
|                      |     |     |    |                |                |               | 2.40%   | Right Paracentral Lobule       |
|                      |     |     |    |                |                |               | 1.90%   | Left Paracentral Lobule        |
|                      |     |     |    |                |                |               | 1.30%   | Right Superior Parietal Lobule |
|                      |     |     |    |                |                |               | 1.00%   | Left Inferior Parietal Lobule  |
|                      |     |     |    |                |                |               | 1.00%   | Right Cingulate Gyrus          |
| 2                    | -37 | -17 | 12 | 0.13           | 0.09           | 2989          | 39.40%  | Left Superior Temporal Gyrus   |
|                      |     |     |    |                |                |               | 16.10%  | Left Middle Temporal Gyrus     |
|                      |     |     |    |                |                |               | 15.80%  | Left Insula                    |
|                      |     |     |    |                |                |               | 7.50%   | Left Postcentral Gyrus         |
|                      |     |     |    |                |                |               | 6.30%   | Left Inferior Parietal Lobule  |

|                      |     |     |    |      |      |      |        |                                 |
|----------------------|-----|-----|----|------|------|------|--------|---------------------------------|
|                      |     |     |    |      |      |      | 4.20%  | Left Transverse Temporal Gyrus  |
|                      |     |     |    |      |      |      | 2.30%  | Left Supramarginal Gyrus        |
|                      |     |     |    |      |      |      | 1.70%  | Left Precentral Gyrus           |
| <b>Right Putamen</b> |     |     |    |      |      |      |        |                                 |
| 1                    | 56  | -9  | -9 | 0.12 | 0.09 | 1032 | 40.60% | Right Middle Temporal Gyrus     |
|                      |     |     |    |      |      |      | 32.80% | Right Superior Temporal Gyrus   |
|                      |     |     |    |      |      |      | 6.30%  | Right Transverse Temporal Gyrus |
|                      |     |     |    |      |      |      | 4.30%  | Right Insula                    |
|                      |     |     |    |      |      |      | 2.40%  | Right Postcentral Gyrus         |
|                      |     |     |    |      |      |      | 2.20%  | Right Inferior Temporal Gyrus   |
| 2                    | -61 | -45 | 20 | 0.11 | 0.09 | 1005 | 40.80% | Left Middle Temporal Gyrus      |
|                      |     |     |    |      |      |      | 38.20% | Left Superior Temporal Gyrus    |
|                      |     |     |    |      |      |      | 6.50%  | Left Inferior Parietal Lobule   |
|                      |     |     |    |      |      |      | 4.40%  | Left Supramarginal Gyrus        |
|                      |     |     |    |      |      |      | 4.20%  | Left Postcentral Gyrus          |
|                      |     |     |    |      |      |      | 4.10%  | Left Insula                     |
| 3                    | 56  | -15 | 44 | 0.11 | 0.09 | 382  | 71.40% | Right Postcentral Gyrus         |
|                      |     |     |    |      |      |      | 13.10% | Right Precentral Gyrus          |
|                      |     |     |    |      |      |      | 4.00%  | Right Inferior Parietal Lobule  |
| 4                    | -29 | -39 | 46 | 0.12 | 0.09 | 342  | 43.60% | Left Inferior Parietal Lobule   |
|                      |     |     |    |      |      |      | 14.80% | Left Precentral Gyrus           |
|                      |     |     |    |      |      |      | 9.30%  | Left Postcentral Gyrus          |
| 5                    | 4   | -39 | 72 | 0.11 | 0.09 | 274  | 16.40% | Right Paracentral Lobule        |
|                      |     |     |    |      |      |      | 5.30%  | Right Medial Frontal Gyrus      |
|                      |     |     |    |      |      |      | 2.50%  | Right Postcentral Gyrus         |

| <b>Right Nucleus Accumbens</b> |                               |     |    |      |      |      |        |                                 |
|--------------------------------|-------------------------------|-----|----|------|------|------|--------|---------------------------------|
| 1                              | 70                            | -21 | 14 | 0.13 | 0.09 | 1597 | 25.10% | Right Precentral Gyrus          |
|                                |                               |     |    |      |      |      | 18.90% | Right Insula                    |
|                                |                               |     |    |      |      |      | 18.80% | Right Postcentral Gyrus         |
|                                |                               |     |    |      |      |      | 10.70% | Right Superior Temporal Gyrus   |
|                                |                               |     |    |      |      |      | 6.60%  | Right Inferior Parietal Lobule  |
|                                |                               |     |    |      |      |      | 3.20%  | Right Middle Temporal Gyrus     |
|                                |                               |     |    |      |      |      | 2.20%  | Right Transverse Temporal Gyrus |
|                                |                               |     |    |      |      |      | 1.30%  | Right Inferior Frontal Gyrus    |
|                                |                               |     |    |      |      |      | 1.30%  | Right Claustrum                 |
|                                |                               |     |    |      |      |      | 2      | -45                             |
| 28.80%                         | Left Precentral Gyrus         |     |    |      |      |      |        |                                 |
| 1.90%                          | Left Inferior Parietal Lobule |     |    |      |      |      |        |                                 |
| 3                              | -59                           | -7  | 10 | 0.12 | 0.09 | 598  | 53.70% | Left Superior Temporal Gyrus    |
|                                |                               |     |    |      |      |      | 16.50% | Left Precentral Gyrus           |
|                                |                               |     |    |      |      |      | 11.20% | Left Inferior Parietal Lobule   |
|                                |                               |     |    |      |      |      | 7.80%  | Left Insula                     |
|                                |                               |     |    |      |      |      | 6.60%  | Left Postcentral Gyrus          |
|                                |                               |     |    |      |      |      | 2.30%  | Left Transverse Temporal Gyrus  |
|                                |                               |     |    |      |      |      | 1.10%  | Left Middle Temporal Gyrus      |
| 4                              | 8                             | -5  | 60 | 0.12 | 0.09 | 559  | 45.90% | Right Medial Frontal Gyrus      |
|                                |                               |     |    |      |      |      | 7.30%  | Left Medial Frontal Gyrus       |
|                                |                               |     |    |      |      |      | 6.70%  | Right Cingulate Gyrus           |
|                                |                               |     |    |      |      |      | 6.70%  | Right Paracentral Lobule        |

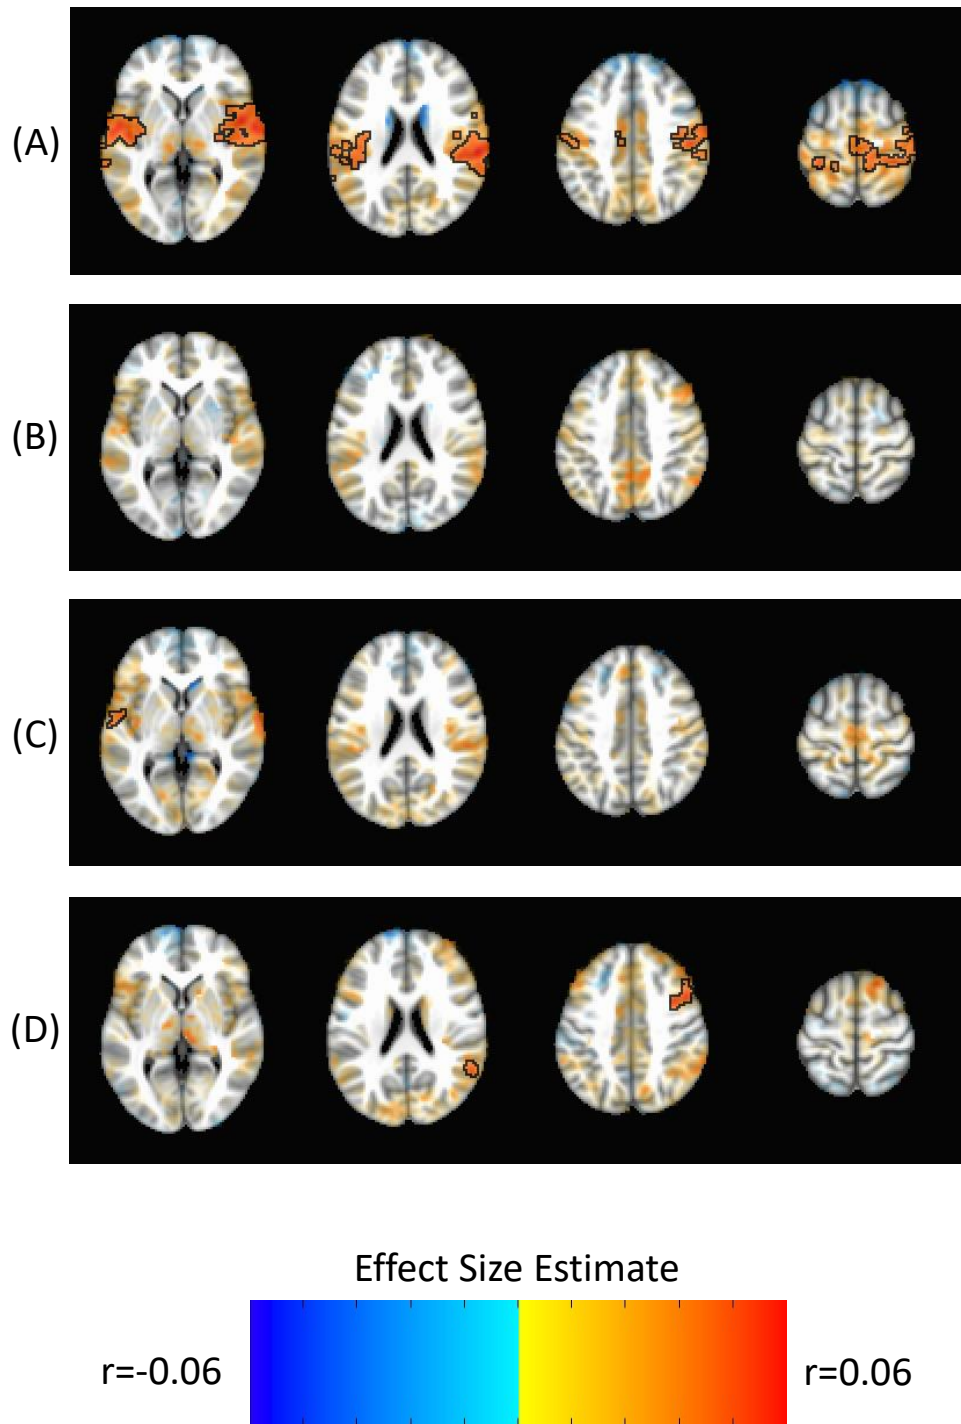

**FIGURE S24.** Findings from a mega-analysis of associations between seed-based subcortico-cortical connectivity and scores on the Attention Problems scale using left hemisphere subcortical seeds. (A) Caudate. (B) Putamen. (C) Nucleus Accumbens. (D) Amygdala. Voxels in significant clusters are opaque and boxed. Subthreshold voxels are presented translucently.



**TABLE S11. Significant associations between Attention Problems scores and subcortico-cortical connectivity using left hemisphere subcortical seeds. n= 9890.**

| Cluster                       | X   | Y   | Z  | Peak<br><i>partial-r</i> | Mean<br><i>partial-r</i> | Size<br>(voxels) | Overlap | Talairach label                 |
|-------------------------------|-----|-----|----|--------------------------|--------------------------|------------------|---------|---------------------------------|
| <b>Left Caudate</b>           |     |     |    |                          |                          |                  |         |                                 |
| 1                             | 66  | -15 | 8  | 0.06                     | 0.04                     | 5440             | 22.10%  | Right Postcentral Gyrus         |
|                               |     |     |    |                          |                          |                  | 21.60%  | Right Superior Temporal Gyrus   |
|                               |     |     |    |                          |                          |                  | 12.60%  | Right Insula                    |
|                               |     |     |    |                          |                          |                  | 11.20%  | Right Precentral Gyrus          |
|                               |     |     |    |                          |                          |                  | 8.20%   | Right Inferior Parietal Lobule  |
|                               |     |     |    |                          |                          |                  | 2.60%   | Right Paracentral Lobule        |
|                               |     |     |    |                          |                          |                  | 2.10%   | Right Transverse Temporal Gyrus |
|                               |     |     |    |                          |                          |                  | 1.90%   | Left Medial Frontal Gyrus       |
|                               |     |     |    |                          |                          |                  | 1.70%   | Right Medial Frontal Gyrus      |
| 2                             | -49 | -11 | -3 | 0.07                     | 0.04                     | 2574             | 45.90%  | Left Superior Temporal Gyrus    |
|                               |     |     |    |                          |                          |                  | 17.20%  | Left Insula                     |
|                               |     |     |    |                          |                          |                  | 12.20%  | Left Postcentral Gyrus          |
|                               |     |     |    |                          |                          |                  | 6.60%   | Left Precentral Gyrus           |
|                               |     |     |    |                          |                          |                  | 5.00%   | Left Inferior Parietal Lobule   |
|                               |     |     |    |                          |                          |                  | 4.30%   | Left Middle Temporal Gyrus      |
|                               |     |     |    |                          |                          |                  | 3.80%   | Left Transverse Temporal Gyrus  |
| 3                             | -33 | -37 | 62 | 0.05                     | 0.04                     | 296              | 37.80%  | Left Postcentral Gyrus          |
|                               |     |     |    |                          |                          |                  | 16.80%  | Left Inferior Parietal Lobule   |
| <b>Left Nucleus Accumbens</b> |     |     |    |                          |                          |                  |         |                                 |
| 1                             | -49 | -1  | 12 | 0.05                     | 0.04                     | 132              | 48.60%  | Left Superior Temporal Gyrus    |

|                      |    |     |    |      |      |     |        |                                |
|----------------------|----|-----|----|------|------|-----|--------|--------------------------------|
|                      |    |     |    |      |      |     | 34.30% | Left Precentral Gyrus          |
|                      |    |     |    |      |      |     | 10.90% | Left Insula                    |
| <b>Left Amygdala</b> |    |     |    |      |      |     |        |                                |
| 1                    | 48 | 12  | 44 | 0.06 | 0.04 | 275 | 88.30% | Right Middle Frontal Gyrus     |
|                      |    |     |    |      |      |     | 6.90%  | Right Precentral Gyrus         |
| 2                    | 58 | -49 | 26 | 0.05 | 0.04 | 248 | 73.90% | Right Supramarginal Gyrus      |
|                      |    |     |    |      |      |     | 14.80% | Right Superior Temporal Gyrus  |
|                      |    |     |    |      |      |     | 11.30% | Right Inferior Parietal Lobule |

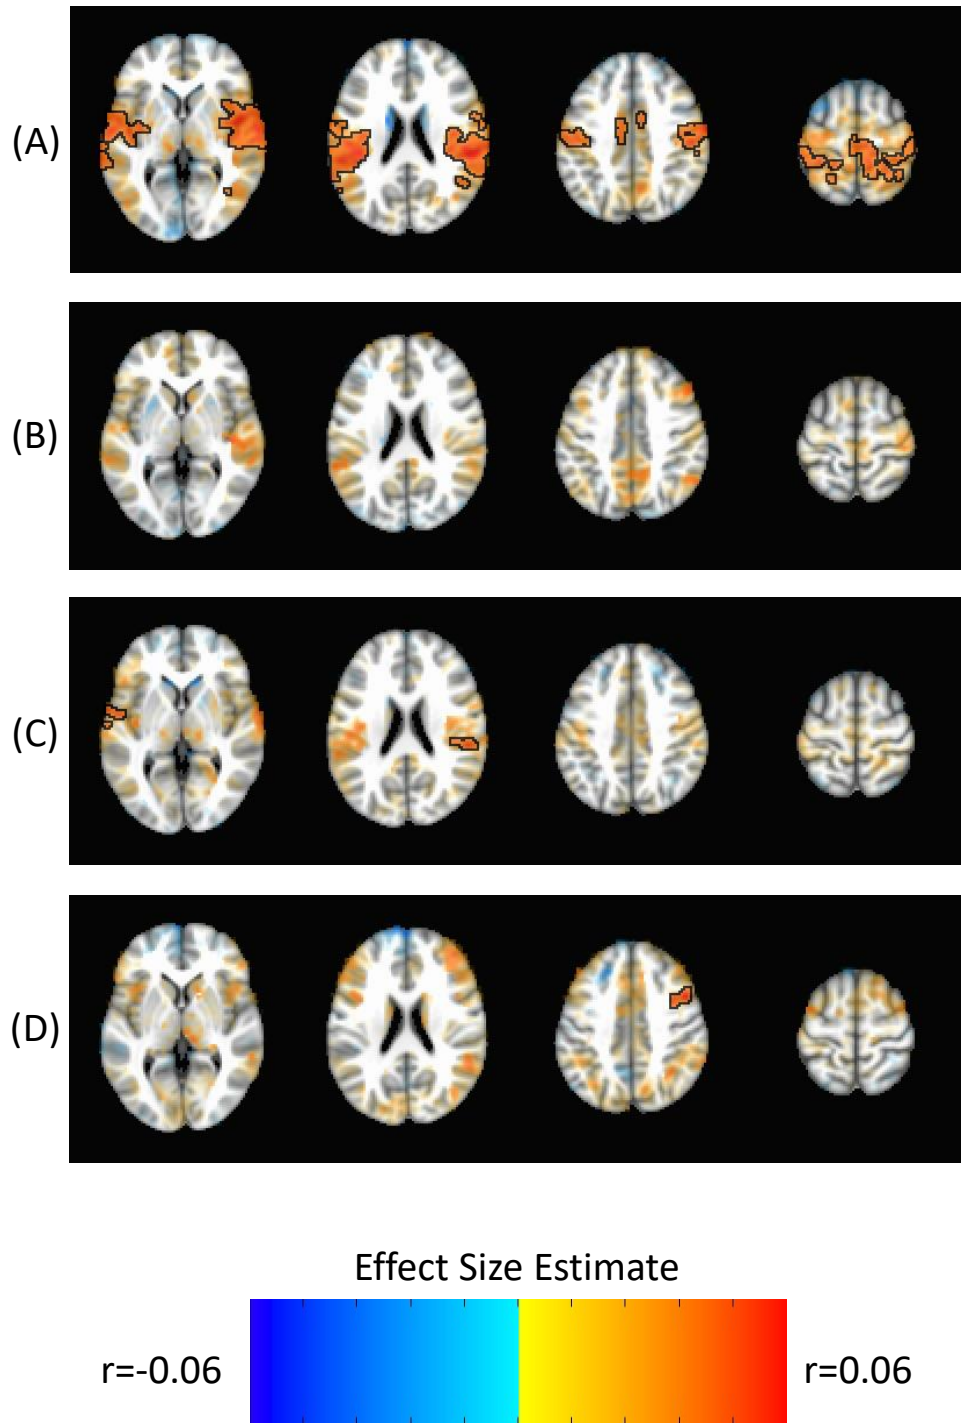

**FIGURE S25.** Findings from a mega-analysis of associations between seed-based subcortico-cortical connectivity and scores on the Attention Problems scale using right hemisphere subcortical seeds. **(A)** Caudate. **(B)** Putamen. **(C)** Nucleus Accumbens. **(D)** Amygdala. Voxels in significant clusters are opaque and boxed. Subthreshold voxels are presented translucently.

**TABLE S12. Significant associations between Attention Problems scores and subcortico-cortical connectivity using right hemisphere subcortical seeds. n= 9890.**

| Cluster              | X   | Y   | Z  | Peak<br><i>partial-r</i> | Mean<br><i>partial-r</i> | Size<br>(voxels) | Overlap | Talairach label                 |
|----------------------|-----|-----|----|--------------------------|--------------------------|------------------|---------|---------------------------------|
| <b>Right Caudate</b> |     |     |    |                          |                          |                  |         |                                 |
| 1                    | 50  | -1  | -1 | 0.06                     | 0.04                     | 6984             | 21.60%  | Right Superior Temporal Gyrus   |
|                      |     |     |    |                          |                          |                  | 15.20%  | Right Postcentral Gyrus         |
|                      |     |     |    |                          |                          |                  | 13.80%  | Right Insula                    |
|                      |     |     |    |                          |                          |                  | 11.40%  | Right Precentral Gyrus          |
|                      |     |     |    |                          |                          |                  | 6.60%   | Right Inferior Parietal Lobule  |
|                      |     |     |    |                          |                          |                  | 2.90%   | Right Paracentral Lobule        |
|                      |     |     |    |                          |                          |                  | 2.30%   | Left Medial Frontal Gyrus       |
|                      |     |     |    |                          |                          |                  | 2.00%   | Right Medial Frontal Gyrus      |
|                      |     |     |    |                          |                          |                  | 1.90%   | Right Middle Temporal Gyrus     |
|                      |     |     |    |                          |                          |                  | 1.20%   | Right Transverse Temporal Gyrus |
|                      |     |     |    |                          |                          |                  | 1.20%   | Left Paracentral Lobule         |
|                      |     |     |    |                          |                          |                  | 1.00%   | Left Cingulate Gyrus            |
|                      |     |     |    |                          |                          |                  | 1.00%   | Right Superior Parietal Lobule  |
| 2                    | -59 | -13 | 10 | 0.07                     | 0.04                     | 4976             | 29.10%  | Left Superior Temporal Gyrus    |
|                      |     |     |    |                          |                          |                  | 19.50%  | Left Postcentral Gyrus          |
|                      |     |     |    |                          |                          |                  | 11.10%  | Left Precentral Gyrus           |
|                      |     |     |    |                          |                          |                  | 10.70%  | Left Insula                     |
|                      |     |     |    |                          |                          |                  | 7.30%   | Left Inferior Parietal Lobule   |
|                      |     |     |    |                          |                          |                  | 4.60%   | Left Middle Temporal Gyrus      |

|                                |     |     |    |      |      |     |        |                                |
|--------------------------------|-----|-----|----|------|------|-----|--------|--------------------------------|
|                                |     |     |    |      |      |     | 2.80%  | Left Transverse Temporal Gyrus |
| 3                              | 46  | -63 | 8  | 0.05 | 0.04 | 370 | 64.50% | Right Middle Temporal Gyrus    |
|                                |     |     |    |      |      |     | 16.90% | Right Middle Occipital Gyrus   |
|                                |     |     |    |      |      |     | 14.20% | Right Superior Temporal Gyrus  |
| <b>Right Nucleus Accumbens</b> |     |     |    |      |      |     |        |                                |
| 1                              | 68  | -23 | 16 | 0.05 | 0.04 | 296 | 35.10% | Right Superior Temporal Gyrus  |
|                                |     |     |    |      |      |     | 31.30% | Right Inferior Parietal Lobule |
|                                |     |     |    |      |      |     | 14.70% | Right Insula                   |
|                                |     |     |    |      |      |     | 11.90% | Right Postcentral Gyrus        |
| 2                              | -51 | -3  | 10 | 0.05 | 0.04 | 292 | 43.70% | Left Superior Temporal Gyrus   |
|                                |     |     |    |      |      |     | 24.30% | Left Precentral Gyrus          |
|                                |     |     |    |      |      |     | 14.60% | Left Transverse Temporal Gyrus |
|                                |     |     |    |      |      |     | 11.00% | Left Postcentral Gyrus         |
|                                |     |     |    |      |      |     | 3.30%  | Left Insula                    |
| <b>Right Amygdala</b>          |     |     |    |      |      |     |        |                                |
| 1                              | 46  | 10  | 40 | 0.06 | 0.04 | 476 | 80.70% | Right Middle Frontal Gyrus     |
|                                |     |     |    |      |      |     | 9.80%  | Right Precentral Gyrus         |
|                                |     |     |    |      |      |     | 6.40%  | Right Inferior Frontal Gyrus   |
| 2                              | 8   | 12  | 54 | 0.05 | 0.04 | 155 | 86.20% | Right Superior Frontal Gyrus   |
|                                |     |     |    |      |      |     | 11.60% | Right Medial Frontal Gyrus     |
|                                |     |     |    |      |      |     | 1.00%  | Left Superior Frontal Gyrus    |

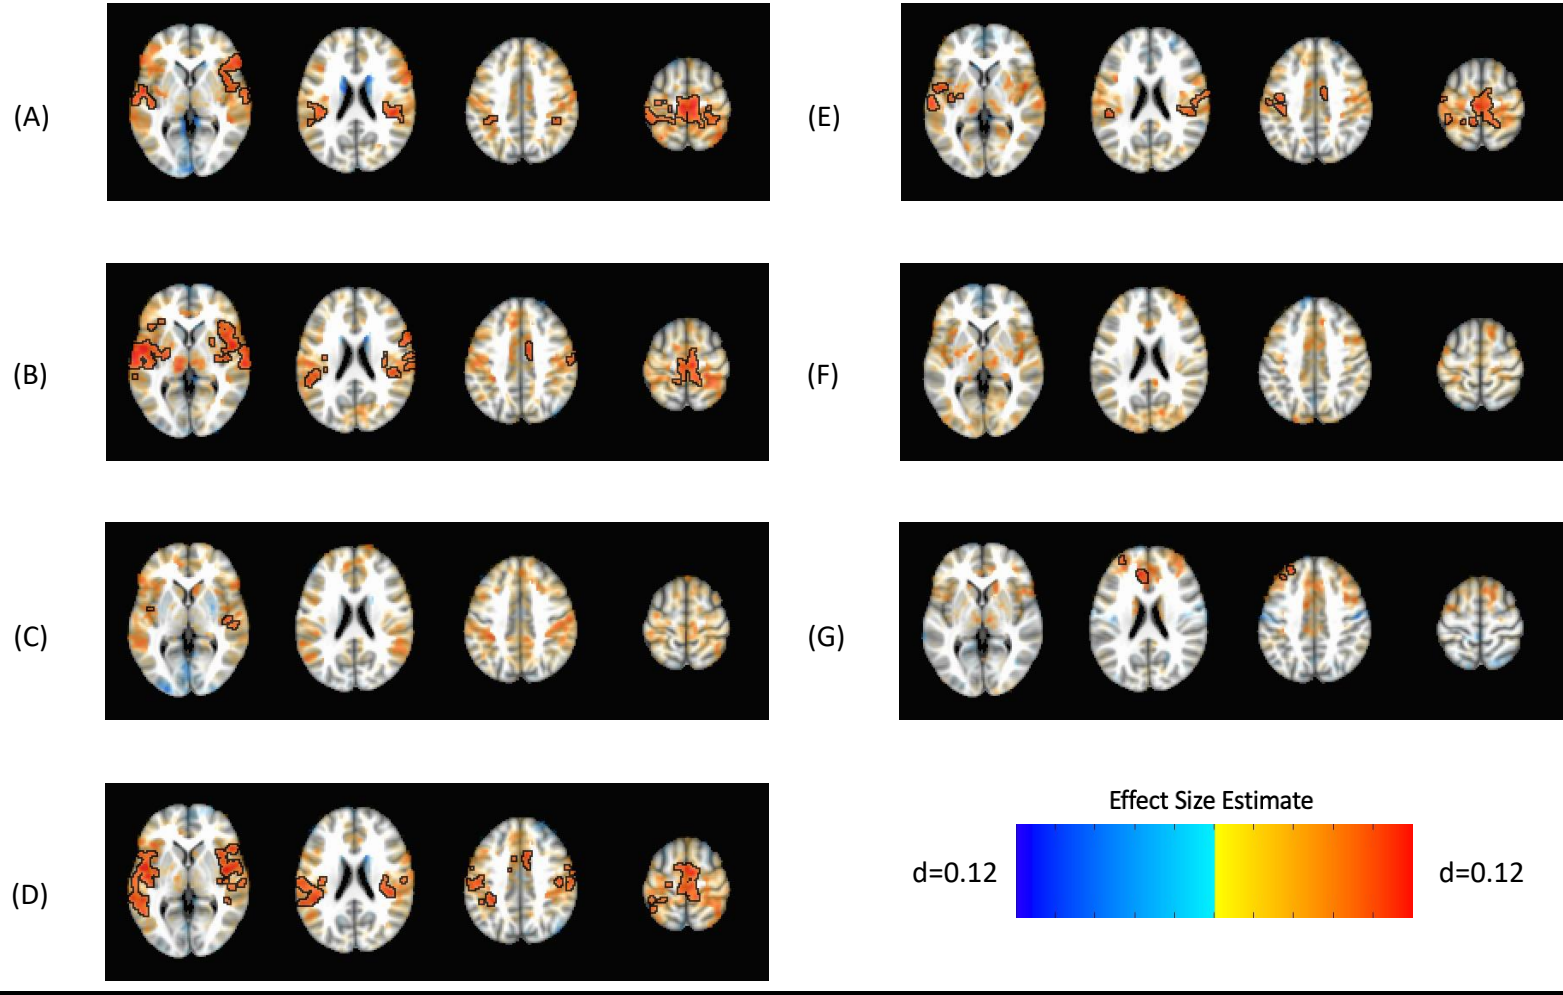

**FIGURE S26.** Findings from a mega-analysis of differences in seed-based subcortico-cortical connectivity in youth with attention deficit/hyperactivity disorder (ADHD) and unaffected control subjects when adopting alternative seed definitions. **(A)** Dorsal Caudate. **(B)** Ventral Caudate. **(C)** Dorsal Putamen **(D)** Ventral Putamen **(E)** Nucleus Accumbens **(F)** Dorsal Amygdala **(G)** Ventral Amygdala. Positive effect sizes indicate ADHD>controls. Voxels in significant clusters are opaque and boxed. Subthreshold voxels are presented translucently.

**TABLE S13. Show results of case-control comparison. n=1696 patients with ADHD and n=6737 unaffected controls when adopting alternative seed definitions.**

| Cluster                         | X   | Y   | Z  | Peak- <i>d</i> | Mean- <i>d</i> | Size (voxels) | Overlap | Talairach label                 |
|---------------------------------|-----|-----|----|----------------|----------------|---------------|---------|---------------------------------|
| <b>Bilateral Dorsal Caudate</b> |     |     |    |                |                |               |         |                                 |
| 1                               | 6   | -21 | 62 | 0.14           | 0.09           | 3197          | 8.80%   | Right Medial Frontal Gyrus      |
|                                 |     |     |    |                |                |               | 8.00%   | Left Medial Frontal Gyrus       |
|                                 |     |     |    |                |                |               | 7.20%   | Right Paracentral Lobule        |
|                                 |     |     |    |                |                |               | 6.20%   | Right Postcentral Gyrus         |
|                                 |     |     |    |                |                |               | 6.00%   | Left Inferior Parietal Lobule   |
|                                 |     |     |    |                |                |               | 5.30%   | Left Paracentral Lobule         |
|                                 |     |     |    |                |                |               | 4.70%   | Left Postcentral Gyrus          |
|                                 |     |     |    |                |                |               | 3.90%   | Right Inferior Parietal Lobule  |
|                                 |     |     |    |                |                |               | 3.50%   | Left Precentral Gyrus           |
|                                 |     |     |    |                |                |               | 1.20%   | Right Precentral Gyrus          |
| 2                               | 46  | -29 | 24 | 0.13           | 0.09           | 1554          | 30.40%  | Right Superior Temporal Gyrus   |
|                                 |     |     |    |                |                |               | 25.10%  | Right Insula                    |
|                                 |     |     |    |                |                |               | 20.20%  | Right Inferior Frontal Gyrus    |
|                                 |     |     |    |                |                |               | 7.70%   | Right Inferior Parietal Lobule  |
|                                 |     |     |    |                |                |               | 4.20%   | Right Precentral Gyrus          |
|                                 |     |     |    |                |                |               | 2.20%   | Right Middle Temporal Gyrus     |
|                                 |     |     |    |                |                |               | 2.00%   | Right Transverse Temporal Gyrus |
| 3                               | -57 | -5  | -1 | 0.12           | 0.09           | 683           | 71.50%  | Left Superior Temporal Gyrus    |
|                                 |     |     |    |                |                |               | 10.50%  | Left Insula                     |
|                                 |     |     |    |                |                |               | 7.10%   | Left Inferior Parietal Lobule   |
|                                 |     |     |    |                |                |               | 4.60%   | Left Postcentral Gyrus          |

|                                  |     |     |    |      |      |      |        |                                 |
|----------------------------------|-----|-----|----|------|------|------|--------|---------------------------------|
|                                  |     |     |    |      |      |      | 1.50%  | Left Transverse Temporal Gyrus  |
|                                  |     |     |    |      |      |      | 1.40%  | Left Middle Temporal Gyrus      |
| <b>Bilateral Ventral Caudate</b> |     |     |    |      |      |      |        |                                 |
| 1                                | 50  | 2   | 4  | 0.13 | 0.09 | 2683 | 24.20% | Right Superior Temporal Gyrus   |
|                                  |     |     |    |      |      |      | 23.20% | Right Insula                    |
|                                  |     |     |    |      |      |      | 12.50% | Right Precentral Gyrus          |
|                                  |     |     |    |      |      |      | 8.30%  | Right Postcentral Gyrus         |
|                                  |     |     |    |      |      |      | 8.20%  | Right Inferior Frontal Gyrus    |
|                                  |     |     |    |      |      |      | 4.00%  | Right Inferior Parietal Lobule  |
|                                  |     |     |    |      |      |      | 2.50%  | Right Middle Temporal Gyrus     |
|                                  |     |     |    |      |      |      | 1.90%  | Right Lentiform Nucleus         |
|                                  |     |     |    |      |      |      | 1.90%  | Right Transverse Temporal Gyrus |
| 2                                | -55 | -5  | 2  | 0.14 | 0.09 | 1982 | 42.90% | Left Superior Temporal Gyrus    |
|                                  |     |     |    |      |      |      | 21.70% | Left Insula                     |
|                                  |     |     |    |      |      |      | 7.40%  | Left Middle Temporal Gyrus      |
|                                  |     |     |    |      |      |      | 6.10%  | Left Precentral Gyrus           |
|                                  |     |     |    |      |      |      | 5.80%  | Left Inferior Frontal Gyrus     |
|                                  |     |     |    |      |      |      | 4.80%  | Left Lentiform Nucleus          |
|                                  |     |     |    |      |      |      | 4.10%  | Left Inferior Parietal Lobule   |
| 3                                | 8   | -23 | 60 | 0.12 | 0.09 | 1025 | 33.50% | Right Medial Frontal Gyrus      |
|                                  |     |     |    |      |      |      | 13.20% | Right Paracentral Lobule        |
|                                  |     |     |    |      |      |      | 11.80% | Left Medial Frontal Gyrus       |
|                                  |     |     |    |      |      |      | 7.30%  | Right Cingulate Gyrus           |
|                                  |     |     |    |      |      |      | 6.30%  | Left Paracentral Lobule         |
|                                  |     |     |    |      |      |      | 4.00%  | Right Postcentral Gyrus         |



| <b>Bilateral Dorsal Putamen</b>  |     |     |     |      |      |      |        |                                 |
|----------------------------------|-----|-----|-----|------|------|------|--------|---------------------------------|
| 1                                | 58  | -3  | -15 | 0.13 | 0.09 | 731  | 51.40% | Right Middle Temporal Gyrus     |
|                                  |     |     |     |      |      |      | 21.80% | Right Superior Temporal Gyrus   |
|                                  |     |     |     |      |      |      | 5.70%  | Right Inferior Temporal Gyrus   |
|                                  |     |     |     |      |      |      | 4.70%  | Right Transverse Temporal Gyrus |
|                                  |     |     |     |      |      |      | 4.50%  | Right Insula                    |
|                                  |     |     |     |      |      |      | 1.40%  | Right Postcentral Gyrus         |
| 2                                | -49 | -13 | -7  | 0.11 | 0.09 | 351  | 31.90% | Left Middle Temporal Gyrus      |
|                                  |     |     |     |      |      |      | 25.60% | Left Superior Temporal Gyrus    |
|                                  |     |     |     |      |      |      | 7.30%  | Left Insula                     |
|                                  |     |     |     |      |      |      | 6.60%  | Left Fusiform Gyrus             |
|                                  |     |     |     |      |      |      | 5.30%  | Left Inferior Temporal Gyrus    |
| <b>Bilateral Ventral Putamen</b> |     |     |     |      |      |      |        |                                 |
| 1                                | -51 | -3  | -1  | 0.14 | 0.09 | 4647 | 27.90% | Left Superior Temporal Gyrus    |
|                                  |     |     |     |      |      |      | 15.90% | Left Middle Temporal Gyrus      |
|                                  |     |     |     |      |      |      | 13.70% | Left Insula                     |
|                                  |     |     |     |      |      |      | 10.60% | Left Postcentral Gyrus          |
|                                  |     |     |     |      |      |      | 8.90%  | Left Inferior Parietal Lobule   |
|                                  |     |     |     |      |      |      | 6.90%  | Left Precentral Gyrus           |
|                                  |     |     |     |      |      |      | 1.80%  | Left Supramarginal Gyrus        |
|                                  |     |     |     |      |      |      | 1.30%  | Left Transverse Temporal Gyrus  |
| 2                                | 44  | -23 | 8   | 0.13 | 0.09 | 2707 | 26.40% | Right Insula                    |
|                                  |     |     |     |      |      |      | 22.70% | Right Superior Temporal Gyrus   |
|                                  |     |     |     |      |      |      | 15.30% | Right Postcentral Gyrus         |

|                                    |     |     |    |      |      |      |        |                                 |
|------------------------------------|-----|-----|----|------|------|------|--------|---------------------------------|
|                                    |     |     |    |      |      |      | 13.40% | Right Precentral Gyrus          |
|                                    |     |     |    |      |      |      | 5.70%  | Right Inferior Parietal Lobule  |
|                                    |     |     |    |      |      |      | 5.20%  | Right Inferior Frontal Gyrus    |
|                                    |     |     |    |      |      |      | 2.70%  | Right Transverse Temporal Gyrus |
|                                    |     |     |    |      |      |      | 1.90%  | Right Middle Temporal Gyrus     |
| 3                                  | 8   | -9  | 62 | 0.12 | 0.09 | 1557 | 26.50% | Right Medial Frontal Gyrus      |
|                                    |     |     |    |      |      |      | 22.50% | Left Medial Frontal Gyrus       |
|                                    |     |     |    |      |      |      | 9.20%  | Right Paracentral Lobule        |
|                                    |     |     |    |      |      |      | 4.60%  | Right Cingulate Gyrus           |
|                                    |     |     |    |      |      |      | 4.00%  | Left Cingulate Gyrus            |
|                                    |     |     |    |      |      |      | 2.80%  | Left Paracentral Lobule         |
|                                    |     |     |    |      |      |      | 2.60%  | Left Superior Frontal Gyrus     |
|                                    |     |     |    |      |      |      | 1.50%  | Right Postcentral Gyrus         |
|                                    |     |     |    |      |      |      | 1.10%  | Right Superior Frontal Gyrus    |
| <b>Bilateral Nucleus Accumbens</b> |     |     |    |      |      |      |        |                                 |
| 1                                  | -39 | -13 | 52 | 0.13 | 0.09 | 1118 | 34.00% | Left Postcentral Gyrus          |
|                                    |     |     |    |      |      |      | 22.30% | Left Precentral Gyrus           |
|                                    |     |     |    |      |      |      | 8.90%  | Left Inferior Parietal Lobule   |
|                                    |     |     |    |      |      |      | 1.00%  | Left Paracentral Lobule         |
|                                    |     |     |    |      |      |      | 0.40%  | Left Superior Parietal Lobule   |
| 2                                  | -5  | -23 | 64 | 0.12 | 0.09 | 1108 | 27.10% | Right Medial Frontal Gyrus      |
|                                    |     |     |    |      |      |      | 17.50% | Left Medial Frontal Gyrus       |
|                                    |     |     |    |      |      |      | 10.20% | Right Paracentral Lobule        |
|                                    |     |     |    |      |      |      | 4.80%  | Right Cingulate Gyrus           |
|                                    |     |     |    |      |      |      | 3.40%  | Right Postcentral Gyrus         |
|                                    |     |     |    |      |      |      | 2.80%  | Left Paracentral Lobule         |
| 3                                  | -35 | -19 | 8  | 0.12 | 0.09 | 676  | 33.60% | Left Superior Temporal Gyrus    |

|                                   |     |     |    |      |      |     |        |                                |
|-----------------------------------|-----|-----|----|------|------|-----|--------|--------------------------------|
|                                   |     |     |    |      |      |     | 26.10% | Left Insula                    |
|                                   |     |     |    |      |      |     | 10.50% | Left Lentiform Nucleus         |
|                                   |     |     |    |      |      |     | 10.30% | Left Precentral Gyrus          |
|                                   |     |     |    |      |      |     | 3.10%  | Left Claustrum                 |
|                                   |     |     |    |      |      |     | 3.10%  | Left Inferior Parietal Lobule  |
|                                   |     |     |    |      |      |     | 1.90%  | Left Middle Temporal Gyrus     |
| 4                                 | 62  | -21 | 36 | 0.11 | 0.09 | 439 | 40.60% | Right Postcentral Gyrus        |
|                                   |     |     |    |      |      |     | 24.10% | Right Precentral Gyrus         |
|                                   |     |     |    |      |      |     | 21.00% | Right Inferior Parietal Lobule |
|                                   |     |     |    |      |      |     | 9.80%  | Right Insula                   |
| <b>Bilateral Ventral Amygdala</b> |     |     |    |      |      |     |        |                                |
| 1                                 | -31 | 50  | 28 | 0.11 | 0.10 | 304 | 53.80% | Left Middle Frontal Gyrus      |
|                                   |     |     |    |      |      |     | 42.50% | Left Superior Frontal Gyrus    |
| 2                                 | 4   | 32  | 16 | 0.12 | 0.10 | 161 | 63.10% | Left Anterior Cingulate        |
|                                   |     |     |    |      |      |     | 13.10% | Right Anterior Cingulate       |
|                                   |     |     |    |      |      |     | 10.60% | Left Medial Frontal Gyrus      |
|                                   |     |     |    |      |      |     | 8.30%  | Left Cingulate Gyrus           |

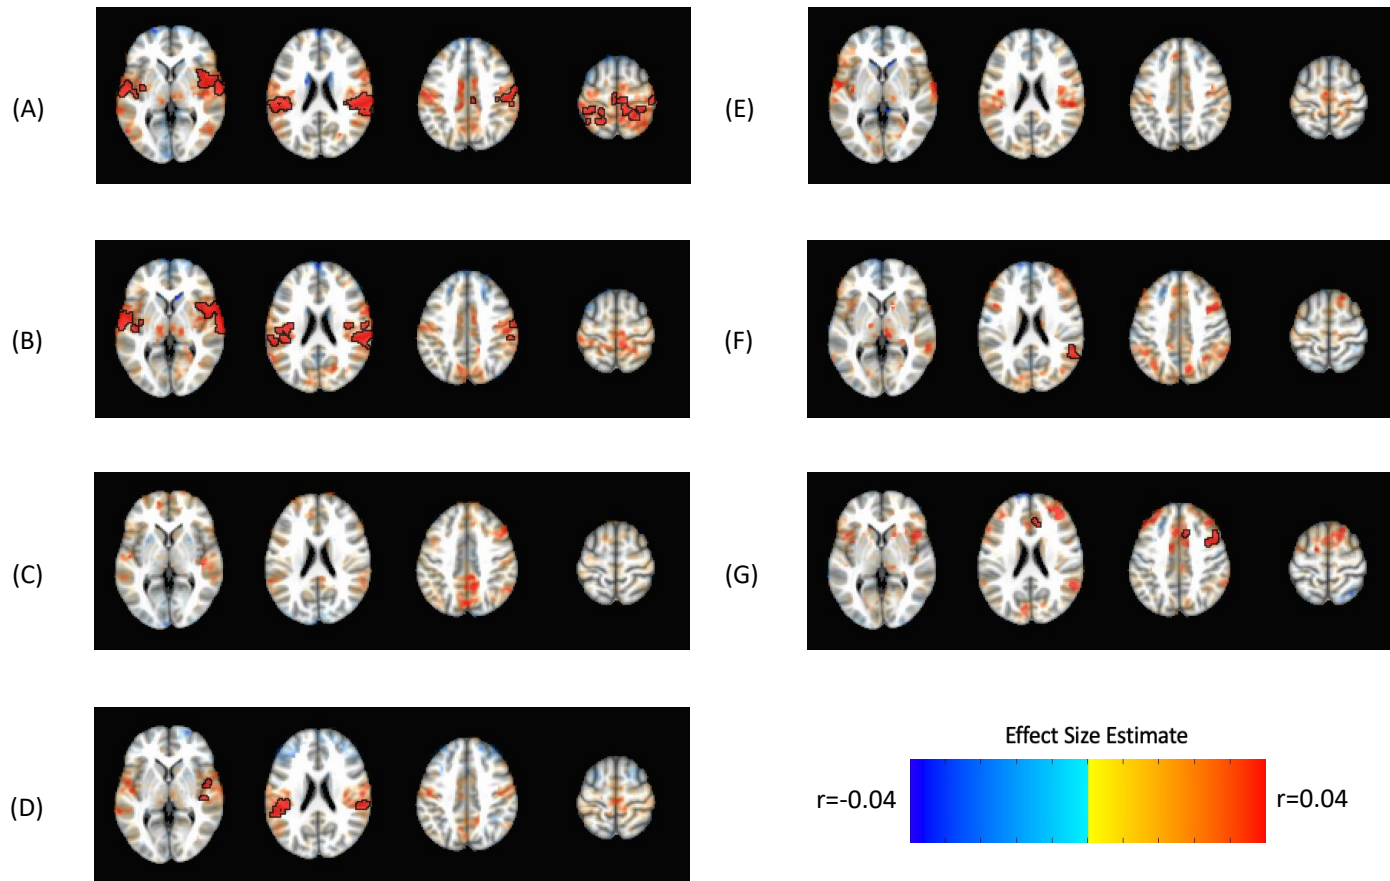

**FIGURE S27.** Findings from a mega-analysis of associations between seed-based subcortico-cortical connectivity and scores on the Attention Problems scale when adopting alternative seed definitions. **(A)** Dorsal Caudate. **(B)** Ventral Caudate. **(C)** Dorsal Putamen **(D)** Ventral Putamen **(E)** Nucleus Accumbens **(F)** Dorsal Amygdala **(G)** Ventral Amygdala. Positive effect sizes indicate ADHD>controls. Voxels in significant clusters are opaque and boxed. Subthreshold voxels are presented translucently.

**TABLE S14. Significant associations between Attention Problems scores and subcortico-cortical connectivity using alternative seed definitions. n= 9890.**

| Cluster                         | X   | Y   | Z  | Peak<br><i>partial-r</i> | Mean<br><i>partial-r</i> | Size<br>(voxels) | Overlap | Talairach label                 |
|---------------------------------|-----|-----|----|--------------------------|--------------------------|------------------|---------|---------------------------------|
| <b>Bilateral Dorsal Caudate</b> |     |     |    |                          |                          |                  |         |                                 |
| 1                               | 48  | -27 | 26 | 0.07                     | 0.04                     | 2664             | 21.50%  | Right Superior Temporal Gyrus   |
|                                 |     |     |    |                          |                          |                  | 21.30%  | Right Postcentral Gyrus         |
|                                 |     |     |    |                          |                          |                  | 20.10%  | Right Insula                    |
|                                 |     |     |    |                          |                          |                  | 14.50%  | Right Inferior Parietal Lobule  |
|                                 |     |     |    |                          |                          |                  | 10.40%  | Right Precentral Gyrus          |
|                                 |     |     |    |                          |                          |                  | 2.10%   | Right Transverse Temporal Gyrus |
|                                 |     |     |    |                          |                          |                  | 1.10%   | Right Middle Temporal Gyrus     |
| 2                               | -61 | -31 | 14 | 0.06                     | 0.04                     | 1311             | 53.40%  | Left Superior Temporal Gyrus    |
|                                 |     |     |    |                          |                          |                  | 15.40%  | Left Insula                     |
|                                 |     |     |    |                          |                          |                  | 12.40%  | Left Postcentral Gyrus          |
|                                 |     |     |    |                          |                          |                  | 6.50%   | Left Inferior Parietal Lobule   |
|                                 |     |     |    |                          |                          |                  | 5.80%   | Left Transverse Temporal Gyrus  |
|                                 |     |     |    |                          |                          |                  | 1.90%   | Left Precentral Gyrus           |
|                                 |     |     |    |                          |                          |                  | 1.80%   | Left Middle Temporal Gyrus      |
| 3                               | 20  | -43 | 68 | 0.05                     | 0.04                     | 919              | 24.00%  | Right Postcentral Gyrus         |
|                                 |     |     |    |                          |                          |                  | 14.60%  | Right Paracentral Lobule        |
|                                 |     |     |    |                          |                          |                  | 6.00%   | Left Medial Frontal Gyrus       |
|                                 |     |     |    |                          |                          |                  | 5.60%   | Right Medial Frontal Gyrus      |
|                                 |     |     |    |                          |                          |                  | 1.90%   | Right Superior Parietal Lobule  |

|                                  |     |     |    |      |      |      |        |                                 |
|----------------------------------|-----|-----|----|------|------|------|--------|---------------------------------|
|                                  |     |     |    |      |      |      | 1.60%  | Right Cingulate Gyrus           |
| 4                                | -29 | -37 | 72 | 0.06 | 0.04 | 604  | 27.50% | Left Postcentral Gyrus          |
|                                  |     |     |    |      |      |      | 9.20%  | Left Inferior Parietal Lobule   |
|                                  |     |     |    |      |      |      | 6.40%  | Left Superior Parietal Lobule   |
| <b>Bilateral Ventral Caudate</b> |     |     |    |      |      |      |        |                                 |
| 1                                | 70  | -15 | 12 | 0.06 | 0.04 | 2365 | 24.20% | Right Superior Temporal Gyrus   |
|                                  |     |     |    |      |      |      | 18.80% | Right Insula                    |
|                                  |     |     |    |      |      |      | 17.00% | Right Inferior Parietal Lobule  |
|                                  |     |     |    |      |      |      | 13.00% | Right Postcentral Gyrus         |
|                                  |     |     |    |      |      |      | 11.50% | Right Precentral Gyrus          |
|                                  |     |     |    |      |      |      | 2.10%  | Right Transverse Temporal Gyrus |
| 2                                | -61 | -11 | 4  | 0.06 | 0.04 | 810  | 48.60% | Left Superior Temporal Gyrus    |
|                                  |     |     |    |      |      |      | 13.70% | Left Insula                     |
|                                  |     |     |    |      |      |      | 13.20% | Left Postcentral Gyrus          |
|                                  |     |     |    |      |      |      | 10.30% | Left Precentral Gyrus           |
|                                  |     |     |    |      |      |      | 7.20%  | Left Transverse Temporal Gyrus  |
| 3                                | -41 | -35 | 24 | 0.05 | 0.04 | 263  | 38.30% | Left Inferior Parietal Lobule   |
|                                  |     |     |    |      |      |      | 35.80% | Left Superior Temporal Gyrus    |
|                                  |     |     |    |      |      |      | 15.60% | Left Insula                     |
|                                  |     |     |    |      |      |      | 4.20%  | Left Postcentral Gyrus          |
| <b>Bilateral Ventral Putamen</b> |     |     |    |      |      |      |        |                                 |
| 1                                | -49 | -31 | 20 | 0.05 | 0.04 | 418  | 37.70% | Left Superior Temporal Gyrus    |
|                                  |     |     |    |      |      |      | 25.80% | Left Insula                     |
|                                  |     |     |    |      |      |      | 25.20% | Left Inferior Parietal Lobule   |
|                                  |     |     |    |      |      |      | 5.90%  | Left Postcentral Gyrus          |

|                                   |    |     |    |      |      |     |        |                                 |
|-----------------------------------|----|-----|----|------|------|-----|--------|---------------------------------|
|                                   |    |     |    |      |      |     | 2.50%  | Left Supramarginal Gyrus        |
| 2                                 | 62 | -31 | 20 | 0.06 | 0.04 | 358 | 47.50% | Right Superior Temporal Gyrus   |
|                                   |    |     |    |      |      |     | 20.30% | Right Inferior Parietal Lobule  |
|                                   |    |     |    |      |      |     | 14.10% | Right Insula                    |
|                                   |    |     |    |      |      |     | 8.30%  | Right Transverse Temporal Gyrus |
|                                   |    |     |    |      |      |     | 6.80%  | Right Postcentral Gyrus         |
|                                   |    |     |    |      |      |     | 2.80%  | Right Precentral Gyrus          |
| <b>Bilateral Dorsal Amygdala</b>  |    |     |    |      |      |     |        |                                 |
| 1                                 | 54 | -45 | 24 | 0.05 | 0.04 | 198 | 51.50% | Right Supramarginal Gyrus       |
|                                   |    |     |    |      |      |     | 30.60% | Right Superior Temporal Gyrus   |
|                                   |    |     |    |      |      |     | 17.80% | Right Inferior Parietal Lobule  |
| <b>Bilateral Ventral Amygdala</b> |    |     |    |      |      |     |        |                                 |
| 1                                 | 8  | 14  | 46 | 0.05 | 0.04 | 228 | 42.30% | Right Cingulate Gyrus           |
|                                   |    |     |    |      |      |     | 28.30% | Right Superior Frontal Gyrus    |
|                                   |    |     |    |      |      |     | 15.40% | Right Anterior Cingulate        |
|                                   |    |     |    |      |      |     | 13.50% | Right Medial Frontal Gyrus      |
| 2                                 | 48 | 10  | 44 | 0.06 | 0.05 | 169 | 90.20% | Right Middle Frontal Gyrus      |
|                                   |    |     |    |      |      |     | 5.60%  | Right Precentral Gyrus          |
|                                   |    |     |    |      |      |     | 4.10%  | Right Inferior Frontal Gyrus    |

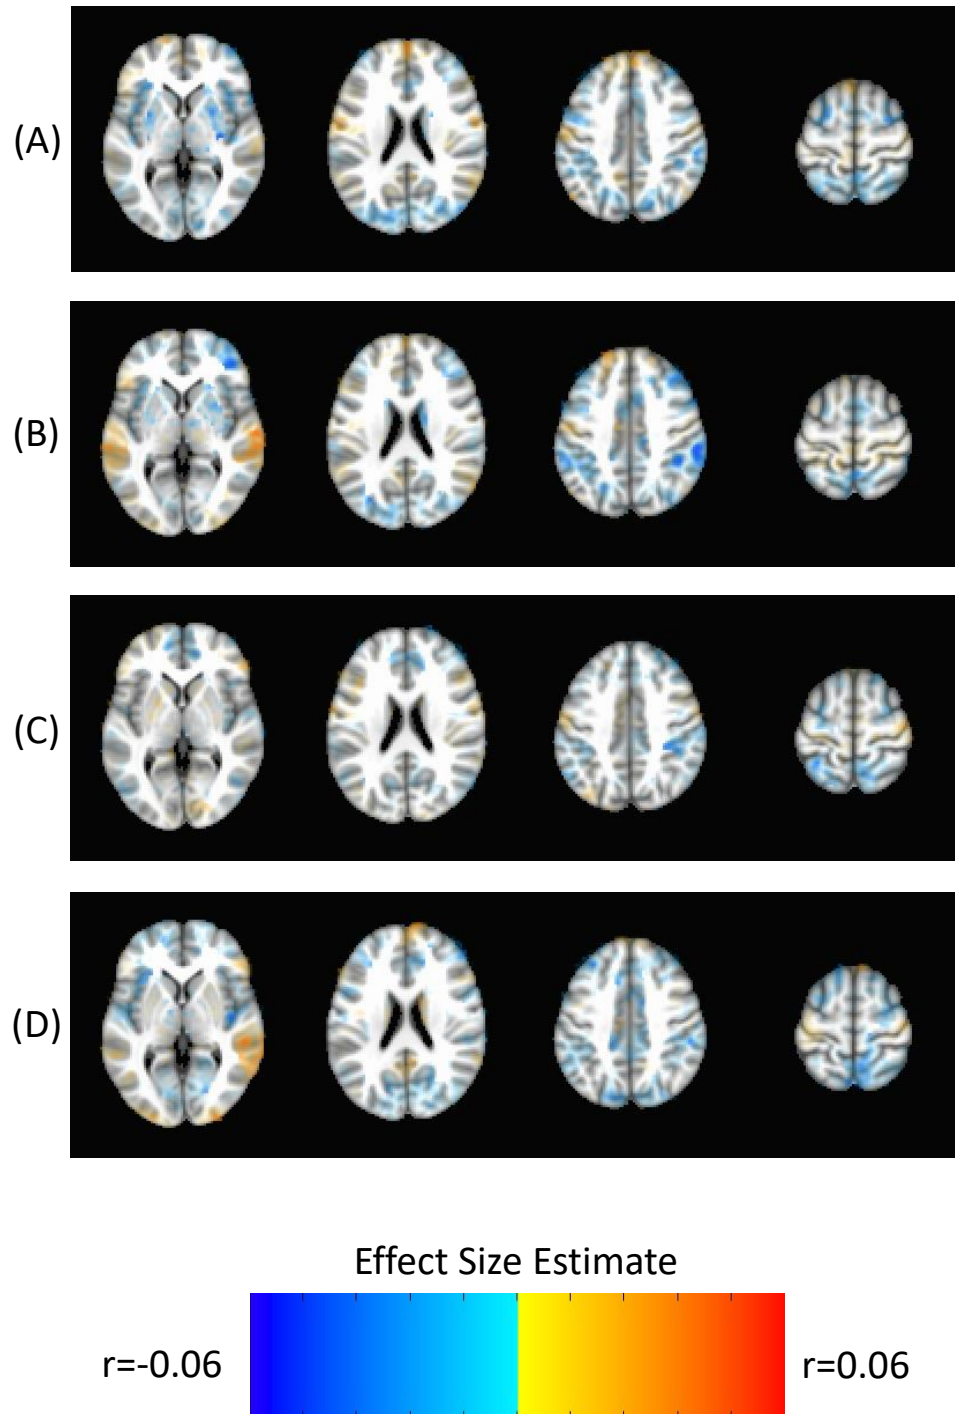

**FIGURE S28.** Findings from models assessing associations between seed-based subcortico-cortical connectivity and scores on the Internalizing Problems broadband scale (A) Caudate. (B) Putamen. (C) Nucleus Accumbens. (D) Amygdala. Subthreshold voxels are presented translucently.



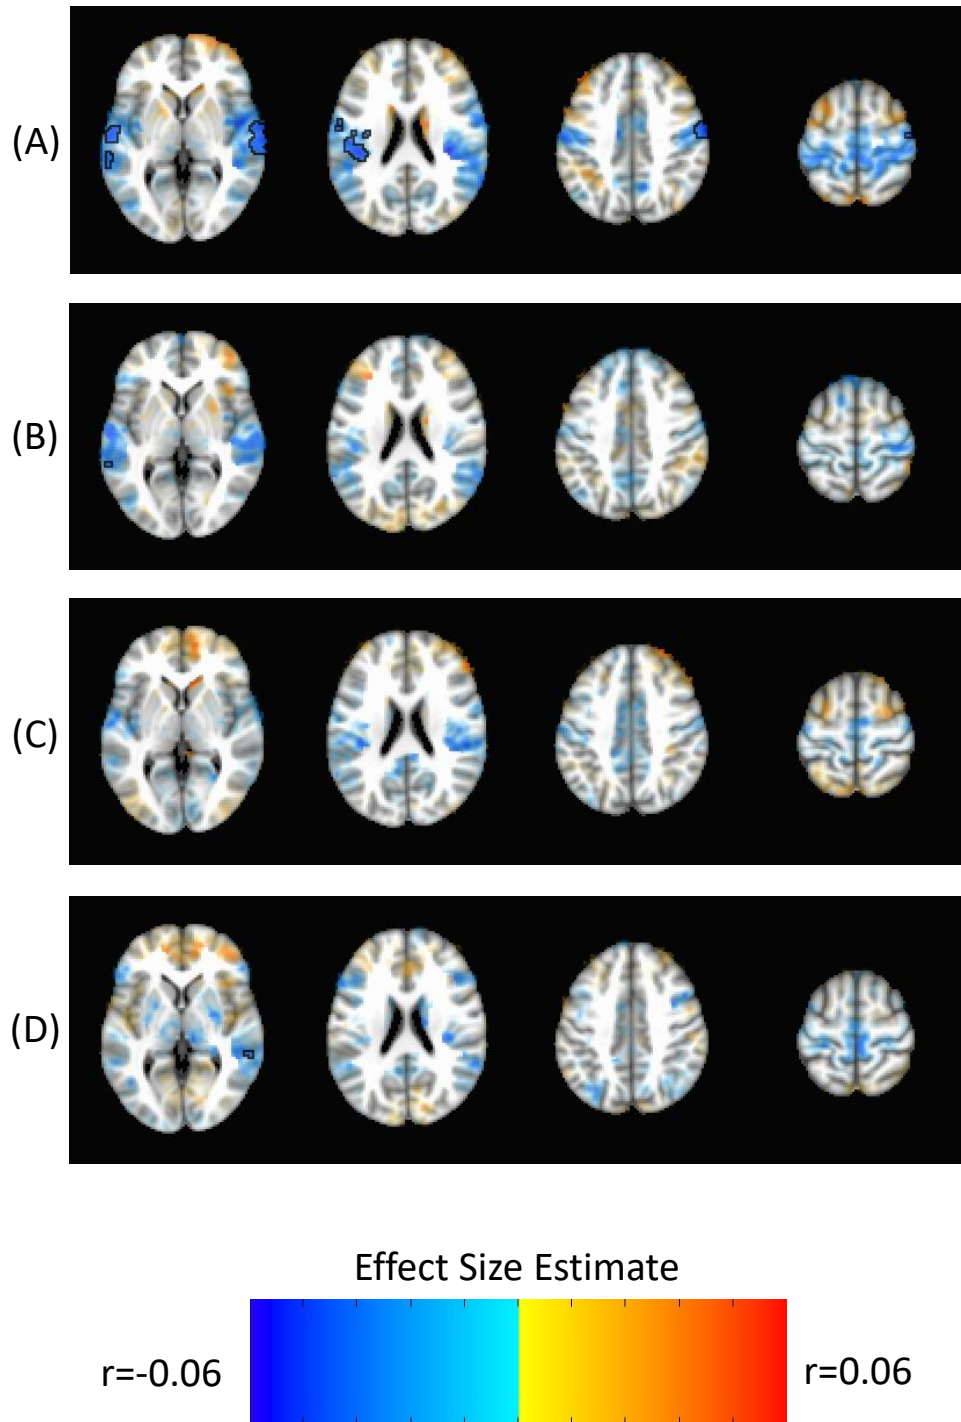

**FIGURE S29.** Findings from models assessing associations between seed-based subcortico-cortical connectivity and scores on the Externalizing Problems broadband scale (A) Caudate. (B) Putamen. (C) Nucleus Accumbens. (D) Amygdala. Voxels in significant clusters are opaque and boxed. Subthreshold voxels are presented translucently.

**TABLE S15. Significant associations between Externalizing Problems scores and subcortico-cortical connectivity. n= 9890.**

| Cluster                   | X   | Y   | Z   | Peak<br><i>partial-r</i> | Mean<br><i>partial-r</i> | Size<br>(voxels) | Overlap | Talairach label                 |
|---------------------------|-----|-----|-----|--------------------------|--------------------------|------------------|---------|---------------------------------|
| <b>Bilateral Caudate</b>  |     |     |     |                          |                          |                  |         |                                 |
| 1                         | -57 | -11 | 6   | -0.06                    | -0.04                    | 818              | 43.80%  | Left Superior Temporal Gyrus    |
|                           |     |     |     |                          |                          |                  | 15.80%  | Left Postcentral Gyrus          |
|                           |     |     |     |                          |                          |                  | 13.40%  | Left Insula                     |
|                           |     |     |     |                          |                          |                  | 9.20%   | Left Precentral Gyrus           |
|                           |     |     |     |                          |                          |                  | 5.40%   | Left Transverse Temporal Gyrus  |
|                           |     |     |     |                          |                          |                  | 4.80%   | Left Middle Temporal Gyrus      |
|                           |     |     |     |                          |                          |                  | 2.70%   | Left Inferior Parietal Lobule   |
| 2                         | 68  | -21 | 8   | -0.06                    | -0.04                    | 514              | 67.10%  | Right Superior Temporal Gyrus   |
|                           |     |     |     |                          |                          |                  | 6.10%   | Right Transverse Temporal Gyrus |
|                           |     |     |     |                          |                          |                  | 5.50%   | Right Middle Temporal Gyrus     |
| 3                         | 52  | -21 | 52  | -0.05                    | -0.04                    | 334              | 48.20%  | Right Postcentral Gyrus         |
|                           |     |     |     |                          |                          |                  | 26.70%  | Right Precentral Gyrus          |
| <b>Bilateral Putamen</b>  |     |     |     |                          |                          |                  |         |                                 |
| 1                         | -63 | -39 | 10  | -0.05                    | -0.04                    | 199              | 77.90%  | Left Superior Temporal Gyrus    |
|                           |     |     |     |                          |                          |                  | 18.20%  | Left Middle Temporal Gyrus      |
| 2                         | 58  | -9  | -15 | -0.05                    | -0.04                    | 157              | 75.10%  | Right Middle Temporal Gyrus     |
|                           |     |     |     |                          |                          |                  | 10.10%  | Right Inferior Temporal Gyrus   |
|                           |     |     |     |                          |                          |                  | 5.70%   | Right Superior Temporal Gyrus   |
|                           |     |     |     |                          |                          |                  | 1.70%   | Right Fusiform Gyrus            |
| <b>Bilateral Amygdala</b> |     |     |     |                          |                          |                  |         |                                 |

|   |    |     |     |       |       |     |        |                               |
|---|----|-----|-----|-------|-------|-----|--------|-------------------------------|
| 1 | 62 | -49 | 10  | -0.05 | -0.04 | 231 | 54.90% | Right Middle Temporal Gyrus   |
|   |    |     |     |       |       |     | 42.60% | Right Superior Temporal Gyrus |
| 2 | 50 | -45 | -23 | -0.06 | -0.04 | 124 | 32.60% | Right Culmen                  |
|   |    |     |     |       |       |     | 28.70% | Right Fusiform Gyrus          |
|   |    |     |     |       |       |     | 9.30%  | Right Tuber                   |
|   |    |     |     |       |       |     | 5.10%  | Right Inferior Temporal Gyrus |

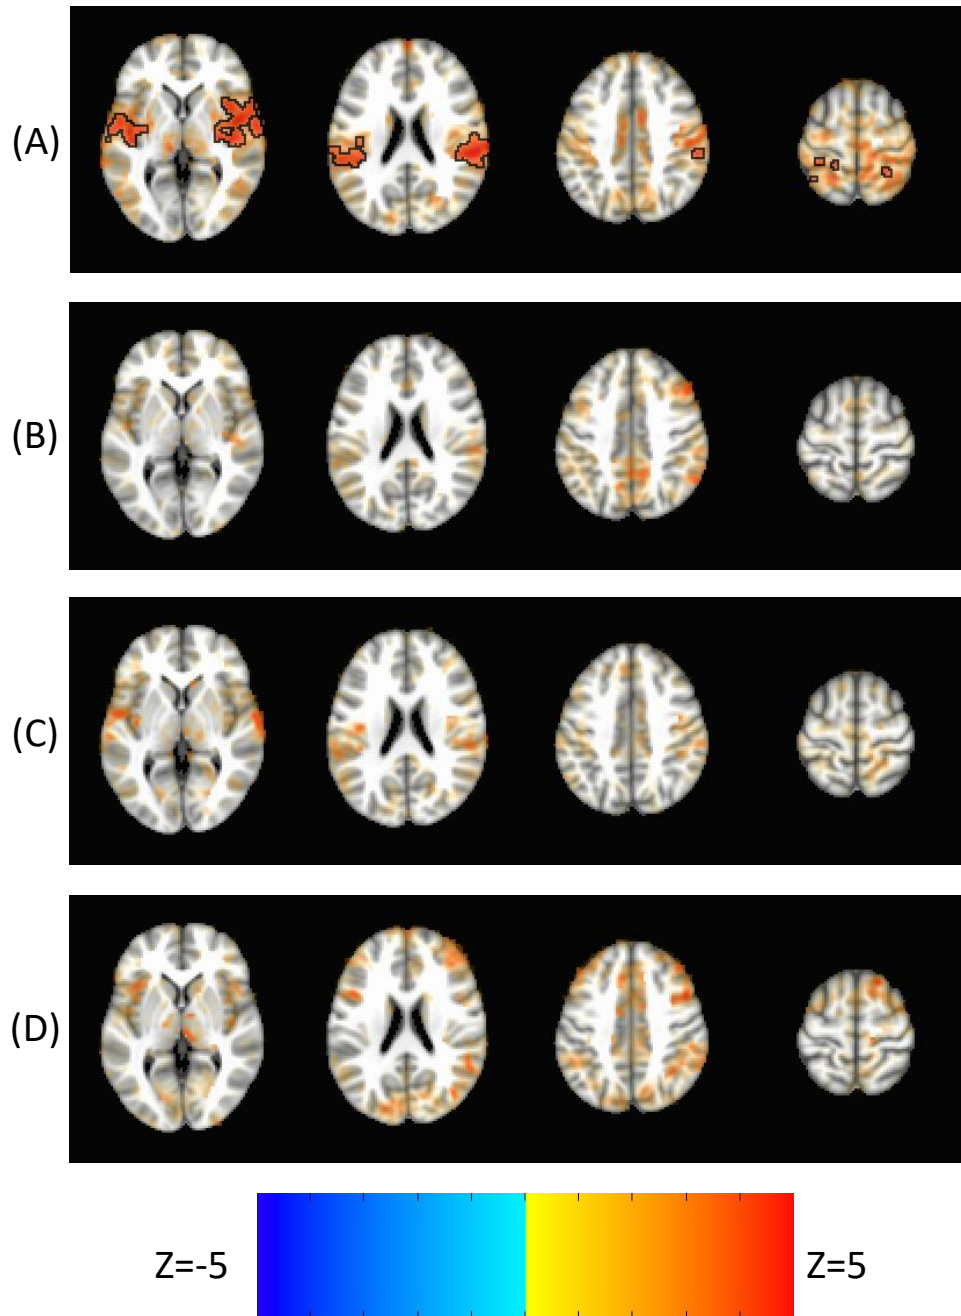

**FIGURE S30.** Shows regions demonstrating significantly different associations with scores on the Attention Problems subscale compared with the Internalizing Problems broadband scale. **(A)** Caudate. **(B)** Putamen. **(C)** Nucleus Accumbens. **(D)** Amygdala. Voxels in significant clusters are opaque and boxed. Subthreshold voxels are presented translucently.

**TABLE S16. Regions demonstrating significantly different associations with scores on the Attention Problems subscale compared with the Internalizing Problems broadband scale (n=9980).**

| Cluster                  | X   | Y   | Z  | Peak-Z | Mean-Z | Size (voxels) | Overlap | Talairach label                 |
|--------------------------|-----|-----|----|--------|--------|---------------|---------|---------------------------------|
| <b>Bilateral Caudate</b> |     |     |    |        |        |               |         |                                 |
| 1                        | 36  | 4   | 12 | 5.88   | 4.29   | 2494          | 28.00%  | Right Superior Temporal Gyrus   |
|                          |     |     |    |        |        |               | 22.70%  | Right Insula                    |
|                          |     |     |    |        |        |               | 16.60%  | Right Inferior Parietal Lobule  |
|                          |     |     |    |        |        |               | 12.30%  | Right Postcentral Gyrus         |
|                          |     |     |    |        |        |               | 9.10%   | Right Precentral Gyrus          |
| 2                        | -49 | -11 | -3 | 5.72   | 4.14   | 1355          | 2.00%   | Right Transverse Temporal Gyrus |
|                          |     |     |    |        |        |               | 52.40%  | Left Superior Temporal Gyrus    |
|                          |     |     |    |        |        |               | 24.00%  | Left Insula                     |
|                          |     |     |    |        |        |               | 7.90%   | Left Inferior Parietal Lobule   |
|                          |     |     |    |        |        |               | 6.80%   | Left Transverse Temporal Gyrus  |
| 3                        | 30  | -55 | 56 | 4.75   | 4.02   | 316           | 4.20%   | Left Postcentral Gyrus          |
|                          |     |     |    |        |        |               | 1.00%   | Left Precentral Gyrus           |
|                          |     |     |    |        |        |               | 22.90%  | Right Superior Parietal Lobule  |
|                          |     |     |    |        |        |               | 5.90%   | Right Postcentral Gyrus         |
|                          |     |     |    |        |        |               | 4.70%   | Right Precuneus                 |
| 4                        | -35 | -43 | 52 | 5.18   | 4.09   | 254           | 1.90%   | Right Inferior Parietal Lobule  |
|                          |     |     |    |        |        |               | 37.40%  | Left Inferior Parietal Lobule   |
|                          |     |     |    |        |        |               | 13.30%  | Left Postcentral Gyrus          |
|                          |     |     |    |        |        |               | 7.10%   | Left Superior Parietal Lobule   |

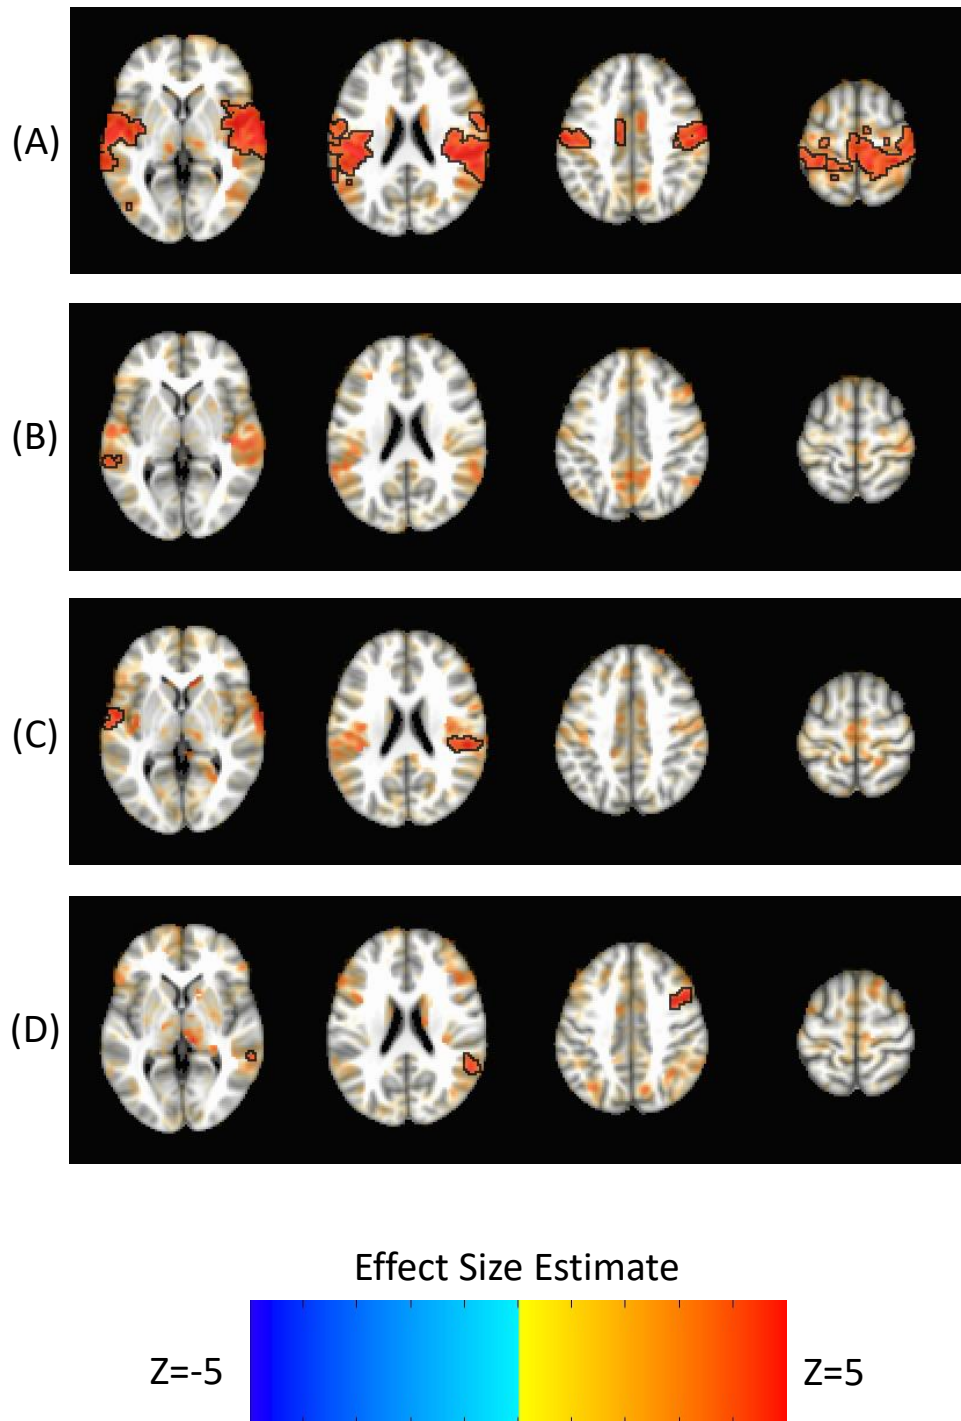

**FIGURE S31.** Shows regions demonstrating significantly different associations with scores on the Attention Problems subscale compared with the Externalizing Problems broadband scale. **(A)** Caudate. **(B)** Putamen. **(C)** Nucleus Accumbens. **(D)** Amygdala. Voxels in significant clusters are opaque and boxed. Subthreshold voxels are presented translucently.

**TABLE S17. Regions demonstrating significantly different associations with scores on the Attention Problems subscale compared with the Externalizing Problems broadband scale (n=9980).**

| Cluster                  | X   | Y   | Z | Peak-Z | Mean-Z | Size (voxels) | Overlap | Talairach label                |
|--------------------------|-----|-----|---|--------|--------|---------------|---------|--------------------------------|
| <b>Bilateral Caudate</b> |     |     |   |        |        |               |         |                                |
| 1                        | -59 | -13 | 6 | 7.74   | 4.47   | 13872         | 12.30%  | Left Superior Temporal Gyrus   |
|                          |     |     |   |        |        |               | 12.00%  | Right Superior Temporal Gyrus  |
|                          |     |     |   |        |        |               | 9.90%   | Right Postcentral Gyrus        |
|                          |     |     |   |        |        |               | 8.10%   | Right Precentral Gyrus         |
|                          |     |     |   |        |        |               | 7.60%   | Left Postcentral Gyrus         |
|                          |     |     |   |        |        |               | 7.30%   | Right Insula                   |
|                          |     |     |   |        |        |               | 5.10%   | Left Precentral Gyrus          |
|                          |     |     |   |        |        |               | 4.20%   | Left Insula                    |
|                          |     |     |   |        |        |               | 3.00%   | Right Inferior Parietal Lobule |
|                          |     |     |   |        |        |               | 2.60%   | Left Middle Temporal Gyrus     |
|                          |     |     |   |        |        |               | 2.20%   | Left Inferior Parietal Lobule  |
|                          |     |     |   |        |        |               | 1.90%   | Right Paracentral Lobule       |
|                          |     |     |   |        |        |               | 1.60%   | Right Medial Frontal Gyrus     |
|                          |     |     |   |        |        |               | 1.50%   | Left Medial Frontal Gyrus      |
|                          |     |     |   |        |        |               | 1.10%   | Right Middle Temporal Gyrus    |
|                          |     |     |   |        |        |               | 1.00%   | Left Paracentral Lobule        |
|                          |     |     |   |        |        |               | 1.00%   | Left Transverse Temporal Gyrus |
| <b>Bilateral Putamen</b> |     |     |   |        |        |               |         |                                |

|                                    |     |     |    |      |      |     |        |                                |
|------------------------------------|-----|-----|----|------|------|-----|--------|--------------------------------|
| 1                                  | 52  | -11 | -9 | 4.96 | 4.12 | 269 | 80.50% | Right Middle Temporal Gyrus    |
|                                    |     |     |    |      |      |     | 7.70%  | Right Inferior Temporal Gyrus  |
|                                    |     |     |    |      |      |     | 3.80%  | Right Superior Temporal Gyrus  |
|                                    |     |     |    |      |      |     | 3.30%  | Right Fusiform Gyrus           |
| 2                                  | -67 | -33 | 14 | 4.84 | 4.04 | 184 | 66.50% | Left Middle Temporal Gyrus     |
|                                    |     |     |    |      |      |     | 33.10% | Left Superior Temporal Gyrus   |
| <b>Bilateral Nucleus Accumbens</b> |     |     |    |      |      |     |        |                                |
| 1                                  | 52  | -31 | 22 | 5.31 | 4.25 | 470 | 42.10% | Right Inferior Parietal Lobule |
|                                    |     |     |    |      |      |     | 29.70% | Right Superior Temporal Gyrus  |
|                                    |     |     |    |      |      |     | 11.10% | Right Insula                   |
|                                    |     |     |    |      |      |     | 10.90% | Right Postcentral Gyrus        |
| 2                                  | -57 | -5  | 2  | 5.21 | 4.18 | 325 | 57.10% | Left Superior Temporal Gyrus   |
|                                    |     |     |    |      |      |     | 26.50% | Left Precentral Gyrus          |
|                                    |     |     |    |      |      |     | 7.10%  | Left Insula                    |
|                                    |     |     |    |      |      |     | 6.30%  | Left Transverse Temporal Gyrus |
| <b>Bilateral Amygdala</b>          |     |     |    |      |      |     |        |                                |
| 1                                  | 48  | 12  | 44 | 6.03 | 4.34 | 397 | 84.10% | Right Middle Frontal Gyrus     |
|                                    |     |     |    |      |      |     | 8.50%  | Right Precentral Gyrus         |
|                                    |     |     |    |      |      |     | 5.00%  | Right Inferior Frontal Gyrus   |
| 2                                  | 62  | -49 | 10 | 5.17 | 4.13 | 364 | 40.60% | Right Superior Temporal Gyrus  |



|  |        |                                |
|--|--------|--------------------------------|
|  | 34.30% | Right Middle Temporal Gyrus    |
|  | 18.70% | Right Supramarginal Gyrus      |
|  | 6.40%  | Right Inferior Parietal Lobule |

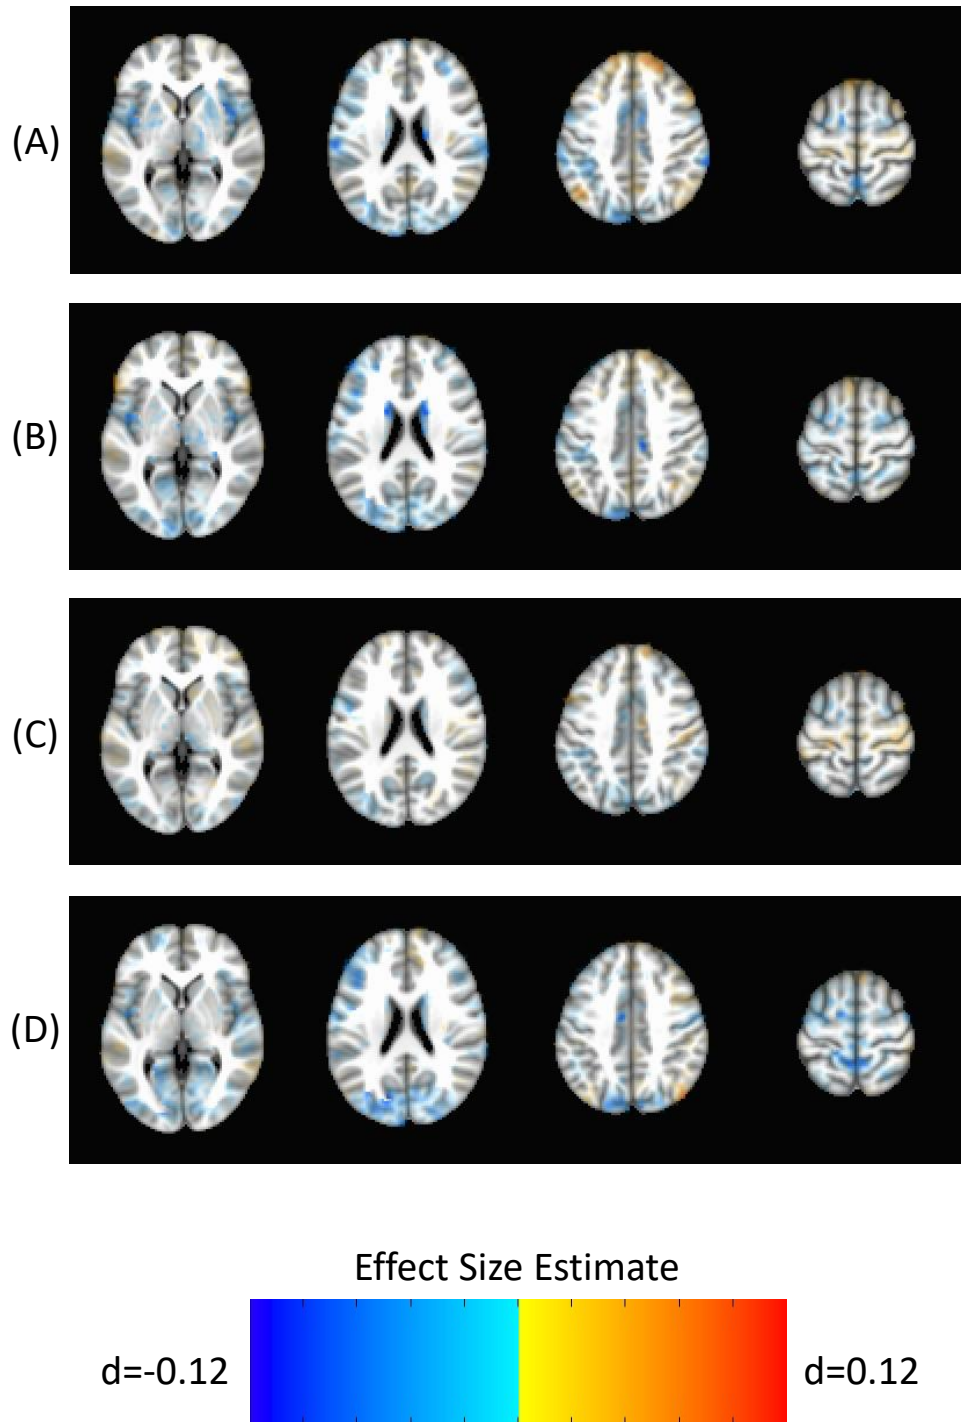

**FIGURE S32.** Findings from models assessing associations between seed-based subcortico-cortical connectivity and working memory performance. **(A)** Caudate. **(B)** Putamen. **(C)** Nucleus Accumbens. **(D)** Amygdala. Voxels in significant clusters are opaque and boxed. Subthreshold voxels are presented translucently.

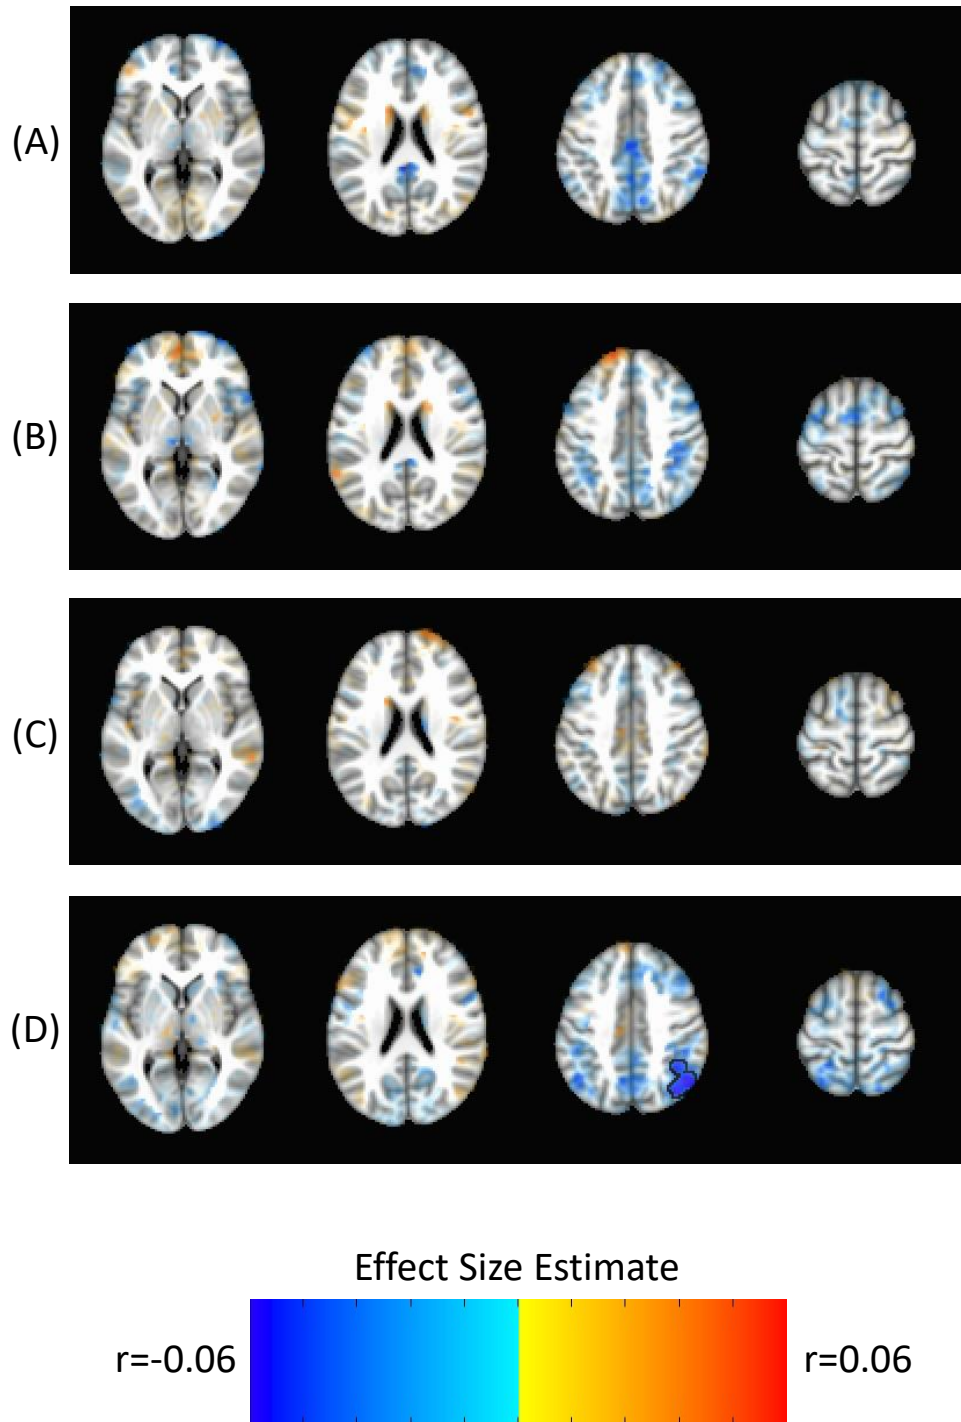

**FIGURE S33.** Findings from models assessing associations between seed-based subcortico-cortical connectivity and working memory performance. **(A)** Caudate. **(B)** Putamen. **(C)** Nucleus Accumbens. **(D)** Amygdala. Voxels in significant clusters are opaque and boxed. Subthreshold voxels are presented translucently.

**TABLE S18. Significant associations between subcortico-cortical connectivity and working memory performance. n= 7245.**

| Cluster                   | X  | Y   | Z  | Peak<br><i>partial-r</i> | Mean<br><i>partial-r</i> | Size<br>(voxels) | Overlap | Talairach label                |
|---------------------------|----|-----|----|--------------------------|--------------------------|------------------|---------|--------------------------------|
| <b>Bilateral Amygdala</b> |    |     |    |                          |                          |                  |         |                                |
| 1                         | 48 | -63 | 44 | -0.07                    | -0.05                    | 531              | 48.40%  | Right Inferior Parietal Lobule |
|                           |    |     |    |                          |                          |                  | 10.10%  | Right Precuneus                |
|                           |    |     |    |                          |                          |                  | 9.00%   | Right Superior Parietal Lobule |
|                           |    |     |    |                          |                          |                  | 5.40%   | Right Angular Gyrus            |

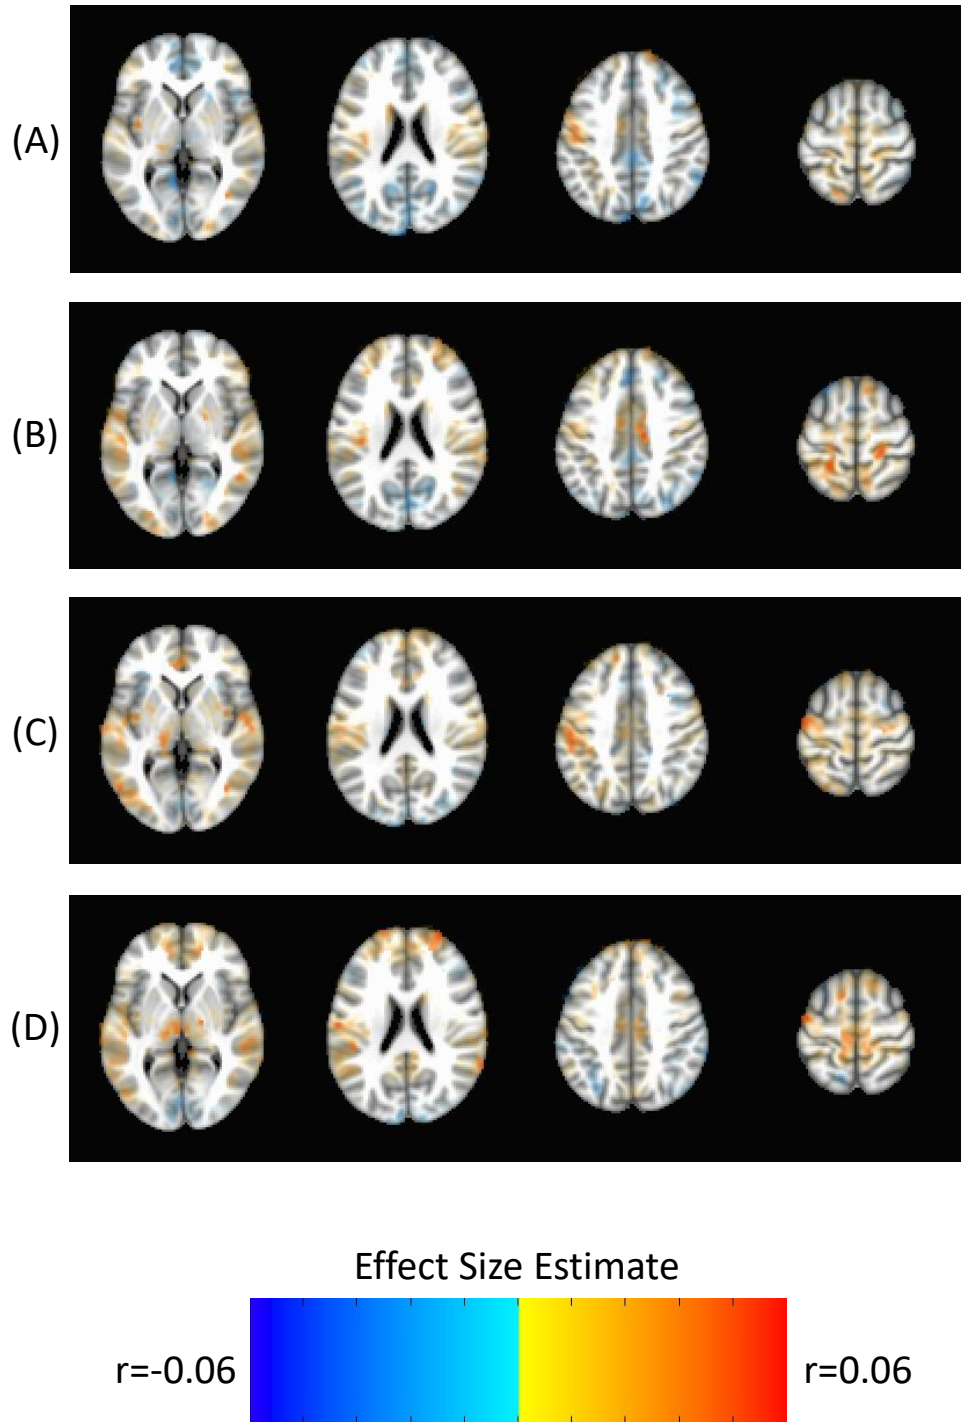

**FIGURE S34.** Findings from models assessing associations between seed-based subcortico-cortical connectivity and processing speed performance. **(A)** Caudate. **(B)** Putamen. **(C)** Nucleus Accumbens. **(D)** Amygdala. Subthreshold voxels are presented translucently.

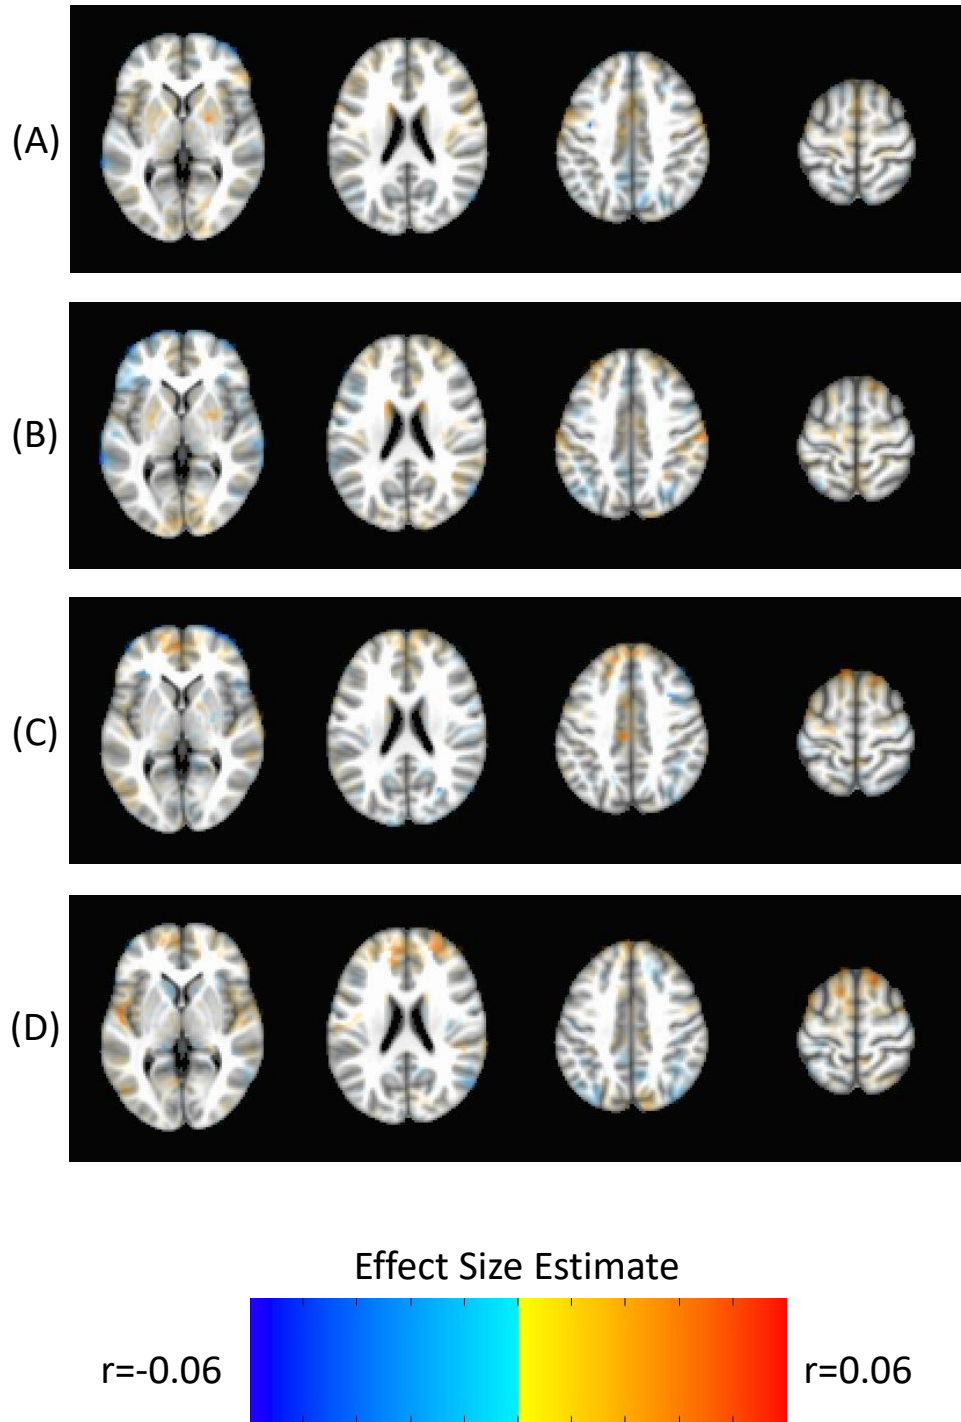

**FIGURE S35.** Findings from models assessing associations between seed-based subcortico-cortical connectivity and flanker task performance. (A) Caudate. (B) Putamen. (C) Nucleus Accumbens. (D) Amygdala. Subthreshold voxels are presented translucently.

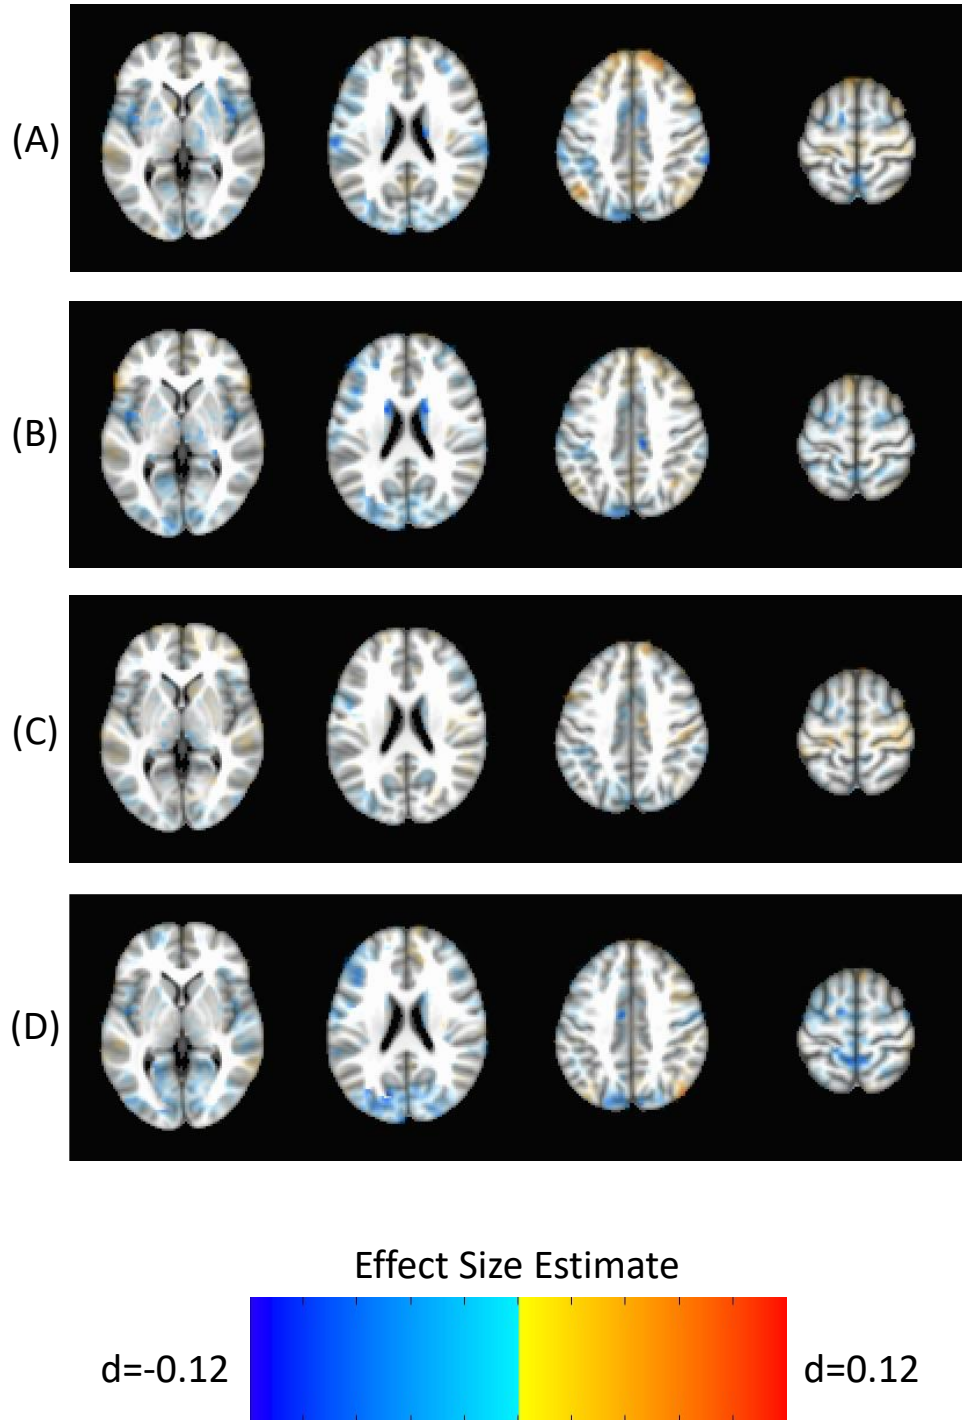

**FIGURE S36.** Findings from models assessing associations between seed-based subcortico-cortical connectivity and decision making on the cash choice task (3 Months >3 days). **(A)** Caudate. **(B)** Putamen. **(C)** Nucleus Accumbens. **(D)** Amygdala. Subthreshold voxels are presented translucently.



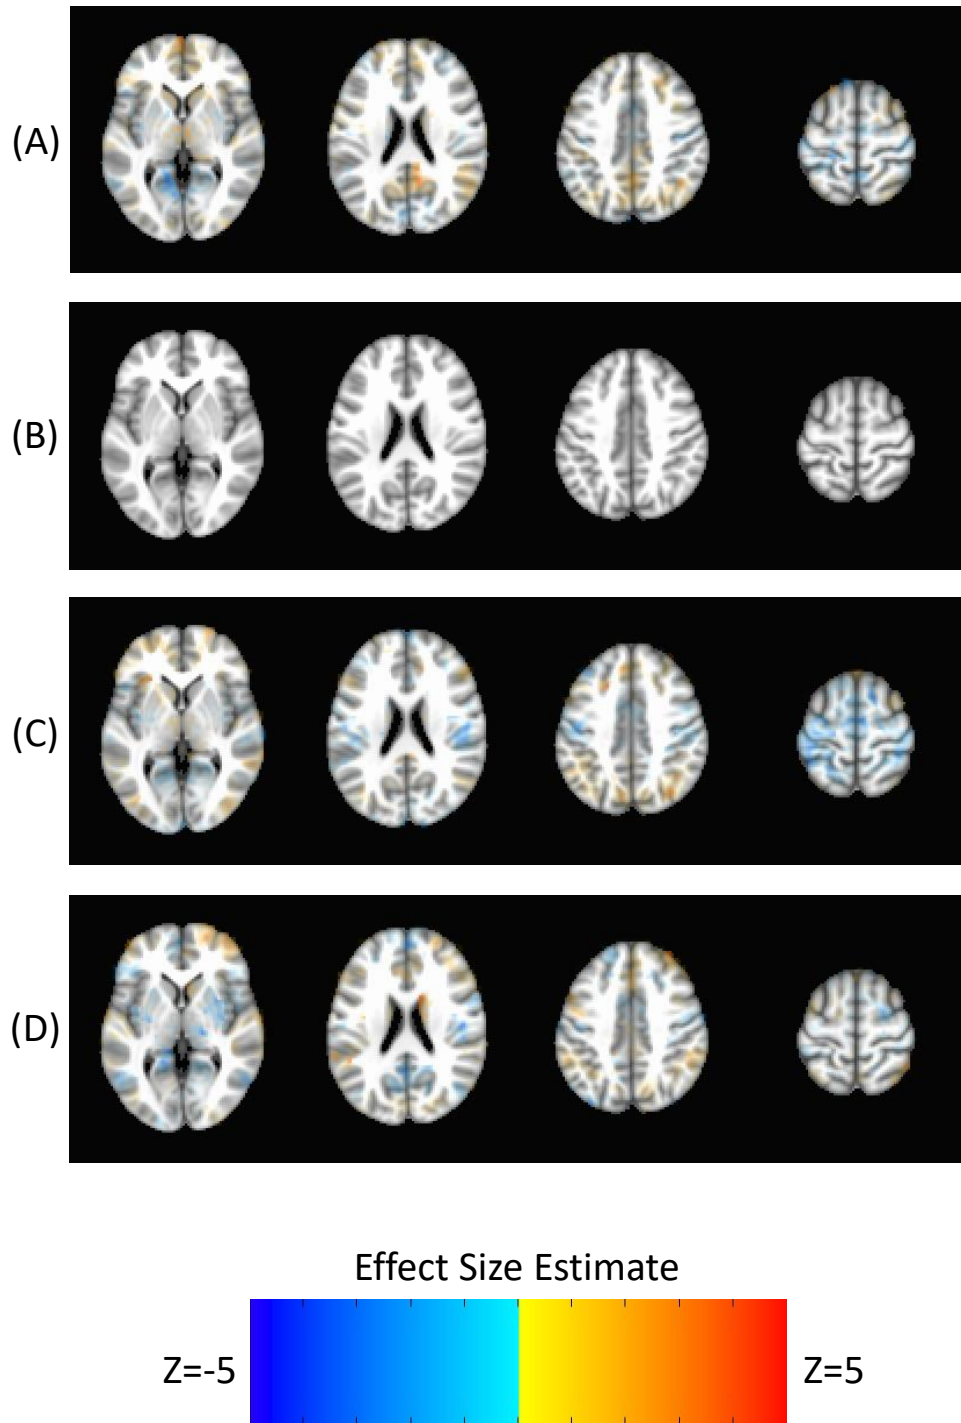

**FIGURE S37.** Findings from models assessing examining association between ADHD diagnosis and the linear effects of age. **(A)** Caudate. **(B)** Putamen. **(C)** Nucleus Accumbens. **(D)** Amygdala. Subthreshold voxels are presented translucently.



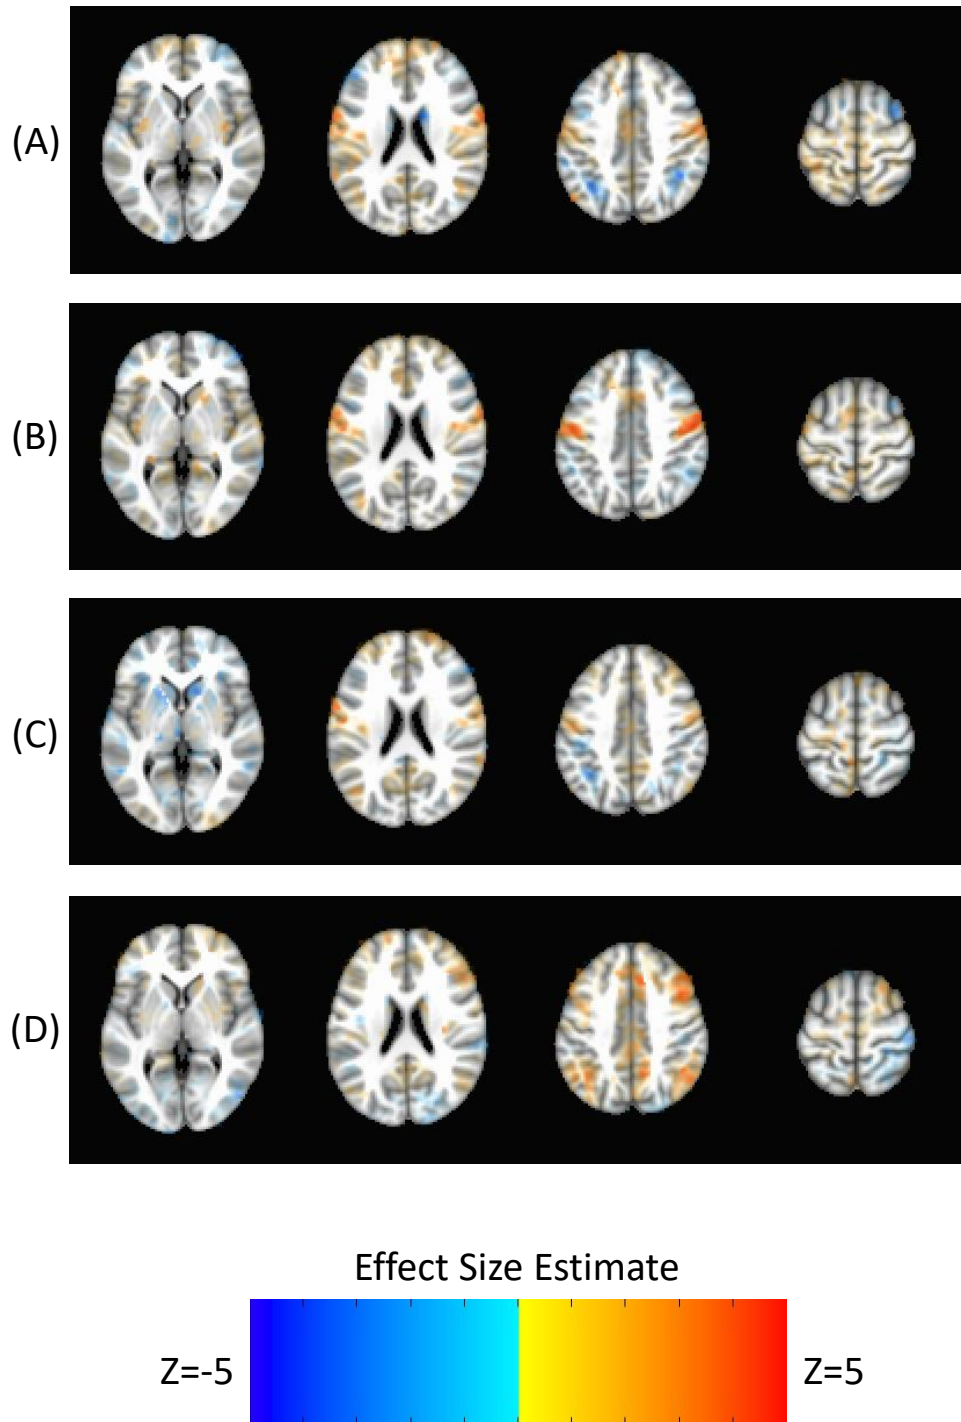

**FIGURE S38.** Findings from models assessing examining association between ADHD diagnosis and quadratic effects of age. (A) Caudate. (B) Putamen. (C) Nucleus Accumbens. (D) Amygdala. Subthreshold voxels are presented translucently.

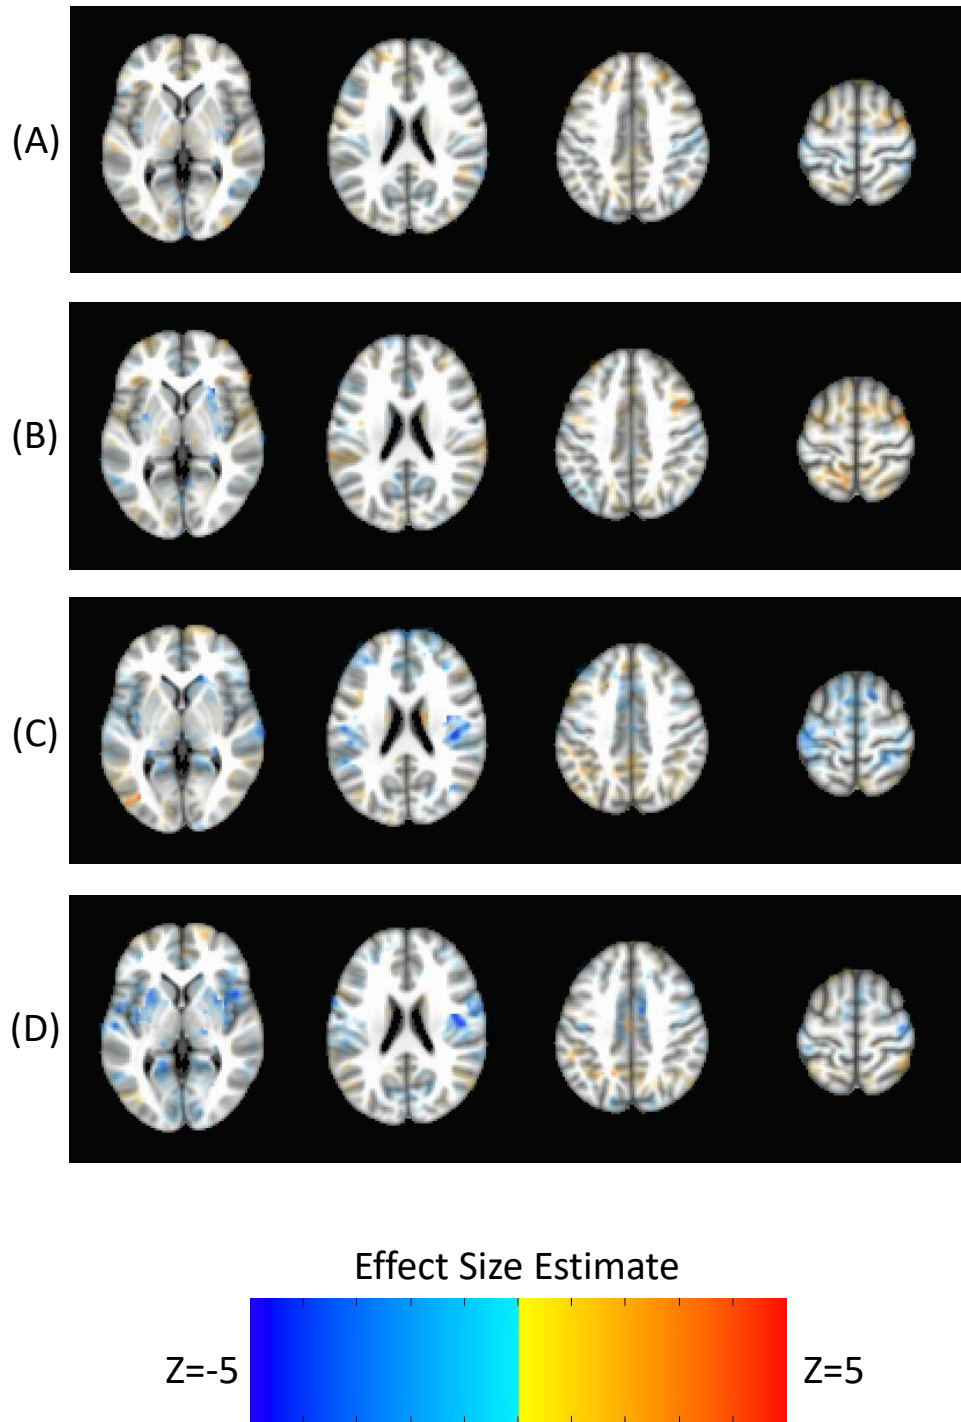

**FIGURE S39.** Findings from models assessing examining association between Attention Problems and the linear effects of age. **(A)** Caudate. **(B)** Putamen. **(C)** Nucleus Accumbens. **(D)** Amygdala. Subthreshold voxels are presented translucently.

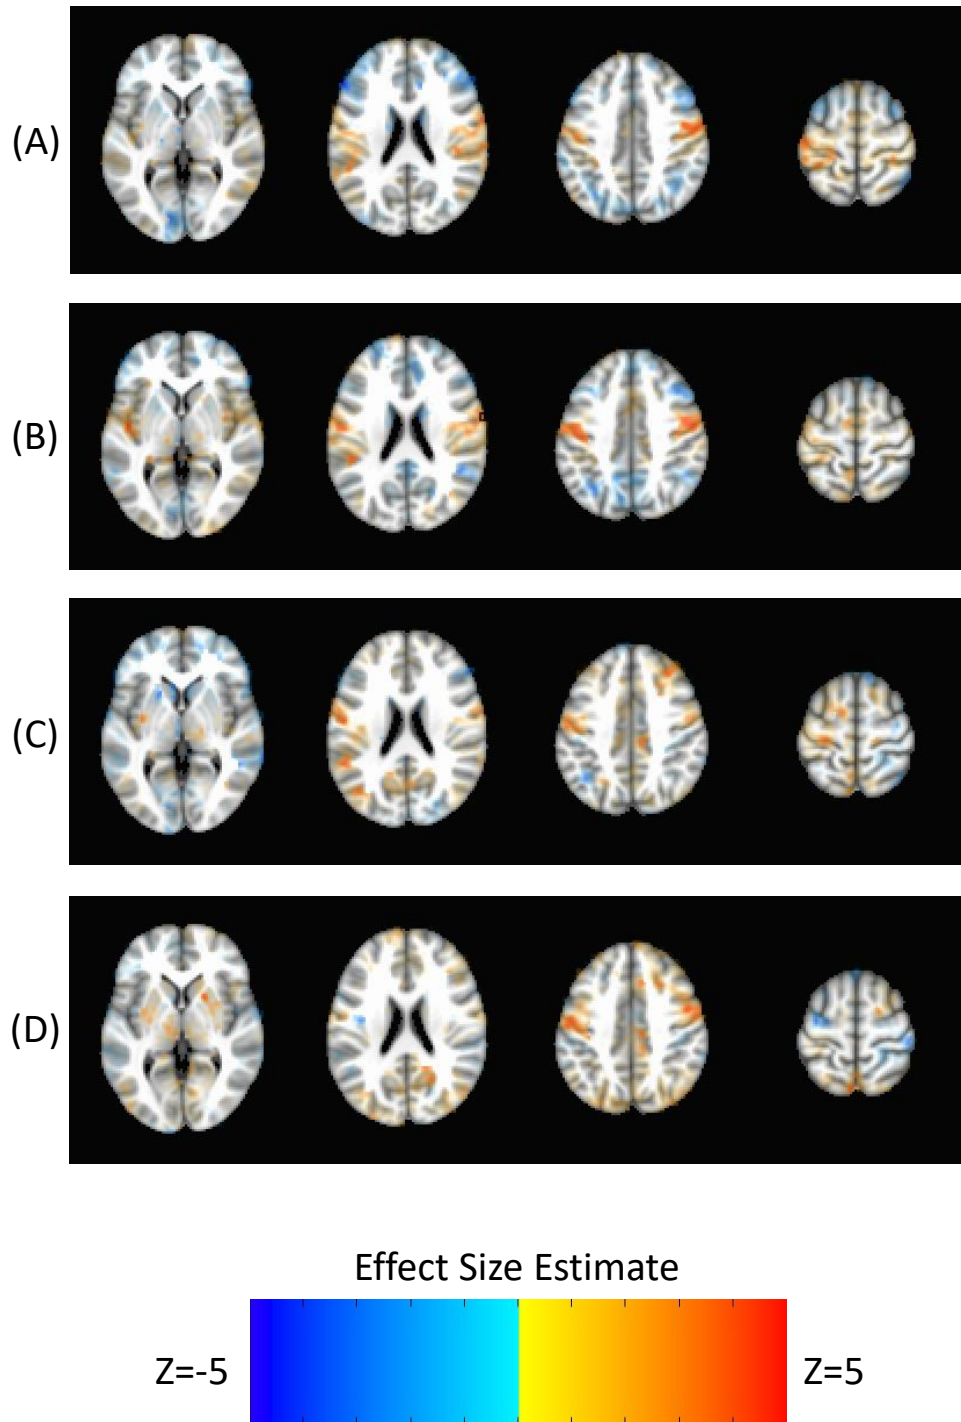

---

**FIGURE S40.** Findings from models assessing examining association between Attention Problems and the quadratic effects of age. **(A)** Caudate. **(B)** Putamen. **(C)** Nucleus Accumbens. **(D)** Amygdala. Subthreshold voxels are presented translucently.

**TABLE S19. Significant interaction between Attention Problems and the quadratic effects of age on subcortico-cortical connectivity.**

| Cluster                  | X  | Y  | Z  | Peak-Z | Mean-Z | Size (voxels) | Overlap | Talairach label               |
|--------------------------|----|----|----|--------|--------|---------------|---------|-------------------------------|
| <b>Bilateral Putamen</b> |    |    |    |        |        |               |         |                               |
| 1                        | 66 | -3 | 16 | 5.26   | 4.34   | 119           | 66.10%  | Right Precentral Gyrus        |
|                          |    |    |    |        |        |               | 8.40%   | Right Superior Temporal Gyrus |
|                          |    |    |    |        |        |               | 5.20%   | Right Postcentral Gyrus       |

## Supplementary References

1. Casey BJ, Cannonier T, Conley MI, et al.: The adolescent brain cognitive development (ABCD) study: imaging acquisition across 21 sites. *Developmental cognitive neuroscience* 2018; 32:43–54
2. Hagler Jr DJ, Hatton S, Cornejo MD, et al.: Image processing and analysis methods for the Adolescent Brain Cognitive Development Study. *Neuroimage* 2019; 202:116091
3. Feczko E, Conan G, Marek S, et al.: Adolescent Brain Cognitive Development (ABCD) Community MRI Collection and Utilities. *bioRxiv* 2021;
4. Townsend L, Kobak K, Kearney C, et al.: Development of three web-based computerized versions of the Kiddie Schedule for affective disorders and schizophrenia child psychiatric diagnostic interview: preliminary validity data. *Journal of the American Academy of Child & Adolescent Psychiatry* 2020; 59:309–325
5. Cordova M, Antovitch DM, Ryabinin P, et al.: ADHD: Restricted Phenotypes Prevalence, Comorbidity, and Polygenic Risk Sensitivity in ABCD Baseline Cohort 2021;
6. Somerville LH, Bookheimer SY, Buckner RL, et al.: The Lifespan Human Connectome Project in Development: A large-scale study of brain connectivity development in 5–21 year olds. *Neuroimage* 2018; 183:456–468
7. Harms MP, Somerville LH, Ances BM, et al.: Extending the Human Connectome Project across ages: Imaging protocols for the Lifespan Development and Aging projects. *Neuroimage* 2018; 183:972–984
8. Norman LJ, Sudre G, Bouyssi-Kobar M, et al.: An examination of the relationships between attention/deficit hyperactivity disorder symptoms and functional connectivity over time. *Neuropsychopharmacology* 2021; 1–7
9. Reich W: Diagnostic interview for children and adolescents (DICA). *Journal of the American Academy of Child & Adolescent Psychiatry* 2000; 39:59–66
10. Brown SA, Brumback T, Tomlinson K, et al.: The National Consortium on Alcohol and NeuroDevelopment in Adolescence (NCANDA): a multisite study of adolescent development and substance use. *Journal of studies on alcohol and drugs* 2015; 76:895–908
11. Pfefferbaum A, Rohlfing T, Pohl KM, et al.: Adolescent development of cortical and white matter structure in the NCANDA sample: role of sex, ethnicity, puberty, and alcohol drinking. *Cerebral cortex* 2016; 26:4101–4121
12. Zhao Q, Sullivan EV, Honnorat N, et al.: Association of heavy drinking with deviant fiber tract development in frontal brain systems in adolescents. *JAMA psychiatry* 2021; 78:407–415

13. Müller-Oehring EM, Kwon D, Nagel BJ, et al.: Influences of age, sex, and moderate alcohol drinking on the intrinsic functional architecture of adolescent brains. *Cerebral Cortex* 2018; 28:1049–1063
14. Pohl KM, Sullivan EV, Pfefferbaum A: The NCANDA\_PUBLIC\_BASE\_RESTINGSTATE\_V01 Data Release of the National Consortium on Alcohol and NeuroDevelopment in Adolescence (NCANDA) [Internet]. Sage Bionetworks Synapse 2017; [cited 2021 Sep 9] Available from: <https://dx.doi.org/10.7303/syn11605291>
15. Pohl KM, Sullivan EV, Pfefferbaum A: The NCANDA\_PUBLIC\_BASE\_STRUCTURAL\_V01 Data Release of the National Consortium on Alcohol and NeuroDevelopment in Adolescence (NCANDA) [Internet]. Sage Bionetworks Synapse 2017; [cited 2021 Sep 9] Available from: <https://dx.doi.org/10.7303/syn11541569>
16. Tobe RH, MacKay-Brandt A, Lim R, et al.: A longitudinal resource for studying connectome development and its psychiatric associations during childhood. *Scientific Data* 2022; 9:300
17. Nooner KB, Colcombe SJ, Tobe RH, et al.: The NKI-Rockland sample: a model for accelerating the pace of discovery science in psychiatry. *Frontiers in neuroscience* 2012; 6:152
18. Wechsler D: WASI-II: Wechsler abbreviated scale of intelligence. 2011;
19. Ai L, Craddock RC, Tottenham N, et al.: Is it time to switch your T1W sequence? Assessing the impact of prospective motion correction on the reliability and quality of structural imaging. *NeuroImage* 2021; 226:117585
20. Esteban O, Markiewicz CJ, Blair RW, et al.: fMRIPrep: a robust preprocessing pipeline for functional MRI. *Nature methods* 2019; 16:111–116
21. Gorgolewski K, Burns CD, Madison C, et al.: Nipype: a flexible, lightweight and extensible neuroimaging data processing framework in python. *Frontiers in neuroinformatics* 2011; 5:13
22. Tustison NJ, Avants BB, Cook PA, et al.: N4ITK: improved N3 bias correction. *IEEE transactions on medical imaging* 2010; 29:1310–1320
23. Jenkinson M, Bannister P, Brady M, et al.: Improved optimization for the robust and accurate linear registration and motion correction of brain images. *Neuroimage* 2002; 17:825–841
24. Ciric R, Wolf DH, Power JD, et al.: Benchmarking of participant-level confound regression strategies for the control of motion artifact in studies of functional connectivity. *Neuroimage* 2017; 154:174–187

25. Ciric R, Rosen AFG, Erus G, et al.: Mitigating head motion artifact in functional connectivity MRI. *Nat Protoc* 2018; 13:2801–2826
26. Gur RE, Moore TM, Rosen AFG, et al.: Burden of Environmental Adversity Associated With Psychopathology, Maturation, and Brain Behavior Parameters in Youths. *JAMA Psychiatry* 2019; 76:966–975
27. Cui Z, Li H, Xia CH, et al.: Individual variation in functional topography of association networks in youth. *Neuron* 2020;
28. Gu S, Xia CH, Ciric R, et al.: Unifying the Notions of Modularity and Core–Periphery Structure in Functional Brain Networks during Youth. *Cerebral Cortex* 2020; 30:1087–1102
29. Cox RW: AFNI: software for analysis and visualization of functional magnetic resonance neuroimages. *Computers and Biomedical research* 1996; 29:162–173
30. Hallquist MN, Hwang K, Luna B: The nuisance of nuisance regression: spectral misspecification in a common approach to resting-state fMRI preprocessing reintroduces noise and obscures functional connectivity. *Neuroimage* 2013; 82:208–225
31. Jenkinson M, Beckmann CF, Behrens TE, et al.: *Fsl*. *Neuroimage* 2012; 62:782–790
32. Desikan RS, Ségonne F, Fischl B, et al.: An automated labeling system for subdividing the human cerebral cortex on MRI scans into gyral based regions of interest. *Neuroimage* 2006; 31:968–980
33. Norman L, Lawrence N, Iles A, et al.: Attachment-security priming attenuates amygdala activation to social and linguistic threat. *Social Cognitive and Affective Neuroscience* 2015; 10:832–839
34. Norman LJ, Sudre G, Bouyssi-Kobar M, et al.: A Longitudinal Study of Resting-State Connectivity and Response to Psychostimulant Treatment in ADHD. *American Journal of Psychiatry* 2021; appi. ajp. 2021.20091342
35. Di Martino A, Scheres A, Margulies DS, et al.: Functional connectivity of human striatum: a resting state FMRI study. *Cerebral cortex* 2008; 18:2735–2747
36. Gianaros PJ, Hariri AR, Sheu LK, et al.: Preclinical atherosclerosis covaries with individual differences in reactivity and functional connectivity of the amygdala. *Biological psychiatry* 2009; 65:943–950
37. Kim S: ppcor: an R package for a fast calculation to semi-partial correlation coefficients. *Communications for statistical applications and methods* 2015; 22:665
38. Kuznetsova A, Brockhoff PB, Christensen RH: lmerTest package: tests in linear mixed effects models. *Journal of statistical software* 2017; 82:1–26

39. Hughett P: Accurate computation of the F-to-z and t-to-z transforms for large arguments. *Journal of Statistical Software* 2008; 23:1–5
40. Ben-Shachar MS, Lüdtke D, Makowski D: effectsize: Estimation of effect size indices and standardized parameters. *Journal of Open Source Software* 2020; 5:2815
41. Fox J, Weisberg S: *An R companion to applied regression*. Sage publications, 2011
42. Yan C-G, Wang X-D, Zuo X-N, et al.: DPABI: data processing & analysis for (resting-state) brain imaging. *Neuroinformatics* 2016; 14:339–351
43. Satterthwaite TD, Wolf DH, Ruparel K, et al.: Heterogeneous impact of motion on fundamental patterns of developmental changes in functional connectivity during youth. *Neuroimage* 2013; 83:45–57
44. Sudre G, Norman L, Bouyssi-Kobar M, et al.: A mega-analytic study of white matter microstructural differences across five cohorts of youth with attention deficit hyperactivity disorder. *Biological Psychiatry* 2022;
45. Arnsten AF, Rubia K: Neurobiological circuits regulating attention, cognitive control, motivation, and emotion: disruptions in neurodevelopmental psychiatric disorders. *Journal of the American Academy of Child & Adolescent Psychiatry* 2012; 51:356–367
46. Norman LJ, Carlisi C, Lukito S, et al.: Structural and functional brain abnormalities in attention-deficit/hyperactivity disorder and obsessive-compulsive disorder: a comparative meta-analysis. *JAMA psychiatry* 2016; 73:815–825
47. Lipszyc J, Schachar R: Inhibitory control and psychopathology: a meta-analysis of studies using the stop signal task. *Journal of the International Neuropsychological Society: JINS* 2010; 16:1064
48. Wright L, Lipszyc J, Dupuis A, et al.: Response inhibition and psychopathology: A meta-analysis of go/no-go task performance. *Journal of Abnormal Psychology* 2014; 123:429
49. Willcutt EG, Doyle AE, Nigg JT, et al.: Validity of the executive function theory of attention-deficit/hyperactivity disorder: a meta-analytic review. *Biological psychiatry* 2005; 57:1336–1346
50. Mowinckel AM, Pedersen ML, Eilertsen E, et al.: A meta-analysis of decision-making and attention in adults with ADHD. *Journal of attention disorders* 2015; 19:355–367
51. Huang-Pollock CL, Karalunas SL, Tam H, et al.: Evaluating vigilance deficits in ADHD: a meta-analysis of CPT performance. *Journal of abnormal psychology* 2012; 121:360
52. Martinussen R, Hayden J, Hogg-Johnson S, et al.: A meta-analysis of working memory impairments in children with attention-deficit/hyperactivity disorder. *Journal of the American academy of child & adolescent psychiatry* 2005; 44:377–384



53. Jackson JN, MacKillop J: Attention-deficit/hyperactivity disorder and monetary delay discounting: a meta-analysis of case-control studies. *Biological Psychiatry: Cognitive Neuroscience and Neuroimaging* 2016; 1:316–325
54. Amlung M, Marsden E, Holshausen K, et al.: Delay discounting as a transdiagnostic process in psychiatric disorders: a meta-analysis. *JAMA psychiatry* 2019; 76:1176–1186
55. Nigg JT, Willcutt EG, Doyle AE, et al.: Causal Heterogeneity in Attention-Deficit/Hyperactivity Disorder: Do We Need Neuropsychologically Impaired Subtypes? *Biological Psychiatry* 2005; 57:1224–1230
56. Norman LJ, Carlisi CO, Christakou A, et al.: Neural dysfunction during temporal discounting in paediatric attention-deficit/hyperactivity disorder and obsessive-compulsive disorder. *Psychiatry Research: Neuroimaging* 2017; 269:97–105
57. Schaefer A, Gray JR: A role for the human amygdala in higher cognition. *Reviews in the Neurosciences* 2007; 18:355–364
58. West HV, Burgess GC, Dust J, et al.: Amygdala activation in cognitive task fMRI varies with individual differences in cognitive traits. *Cognitive, Affective, & Behavioral Neuroscience* 2021; 21:254–264
59. Weintraub S, Dikmen SS, Heaton RK, et al.: Cognition assessment using the NIH Toolbox. *Neurology* 2013; 80:S54–S64
